# Supplementary material for: HCFC1 is a common component of active human CpG-island promoters and coincides with ZNF143, THAP11, YY1, and GABP transcription factor occupancy
Source: HighWire-hosted journal article supplement (doi:10.1101/gr.150078.112), 2013-03-28
Supplement: Supplemental_Figure_Legends.docx [file Supplemental_Figure_Legends.docx]

# Supplementary Figure Legends

# Supplemental Figure 1: A. Distribution of the HCFC1N peaks according to their genomic localization. 5’ DIST: -5000 to -1000 of TSS; TSS-PROX: -1000 to +500 of TSS; 3’ PROX: -500 to +1000 of end of transcript; 3’ DIST: +1000 to +5000 of end of transcript; exon and intron within the coding sequence only, Intergenic: >5000 bps away from transcripts. Percentages of the total number of peaks are indicated for the TSS-PROX and intergenic regions. B. Venn diagram showing the number of HCFC1C or HCFC1N peaks mapping to intergenic regions.

# Supplemental Figure 2: Correlation between ChIP-seq analyses and quantitative PCRs. A. qPCR analysis of TSS-proximal peaks shared between HCFC1C and HCFC1N in ChIP-seq analyses. The IP samples are normalized with the total Input DNA amount using the deltaCt method. B. qPCR analysis TSS-proximal peaks specific to the HCFC1C ChIP-seq analyses. C. qPCR analysis TSS-proximal peaks specific to the HCFC1N ChIP-seq analyses. D. qPCR analysis of intergenic peaks specific to HCFC1N or HCFC1C ChIP-seq analyses or shared by both analyses.

# Supplemental Figure 3: A. Depletion of HCFC1 protein by siRNA treatment. Western blot of the HCFC1C subunit upon siRNA treatment with specific HCFC1 siRNA or luciferase siRNA as negative control. * represents a background band. M : molecular weight marker. B. Boxplots showing the distribution of the difference in mRNA levels in log2 for those genes displaying a significant difference in expression (adjusted p-value ≤ 0.05) with HCFC1 unbound (white) or bound (grey) TSS split between the up-regulated genes (1 and 3) or down-regulated genes (2 and 4).

# Supplemental Figure 4: Identification of DNA binding motifs within HCFC1 peaks A. Distribution of the distances between the middle of the DNA-binding motif and the middle of each HCFC1 peak. The motifs are split according to their forward or reverse direction. B. Percentages of HCFC1 bound (black) or unbound (grey) TSS containing motif 1, 2, or 3 and two other motifs that do not show any specific enrichment. The percentage of E2F1 containing sequences is also indicated. C. The number of TSS-associated peaks, TSS-associated motifs and TSS-associated peaks with motif for each transcription factor indicated is shown. Percentages of motifs showing the presence of the transcription factor and percentages of transcription factor binding sites showing a motif are also indicated.

# Supplemental Figure 5:

# Examples of two promoters bound by HCFC1 in asynchronized and S-phase synchronized cells. The difference in expression (logFC) and the adjusted p-value for the gene expression data are also shown. The tag counts presented in this figure are normalized to 6 mio tags. S-phase synchronized cells were treated with a double thymidine block and released for 4h to permit S-phase entry.
