# Supplementary material for: HCFC1 is a common component of active human CpG-island promoters and coincides with ZNF143, THAP11, YY1, and GABP transcription factor occupancy
Source: HighWire-hosted journal article supplement (doi:10.1101/gr.150078.112), 2013-03-28
Supplement: Supplemental_Table2.xlsx [file Supplemental_Table2.xlsx]

## Sheet: ASYNC_no_gene_match_with_blat_p
HCFC1C peak	chromosome	peak start	peak end	associated feature	feature
ASYNC_2\22\0.55	chr1	751449	752765	Ensembl predicted genes	NCRNA00115
ASYNC_94\14\0.35	chr1	16890299	16919239	Ensembl predicted genes	ESPNP
ASYNC_193\16\0.4	chr1	32469848	32479898	Ensembl predicted genes	LOC339483
ASYNC_380\75\1.875	chr1	109434925	109441077	Ensembl predicted genes	TMEM167B
ASYNC_381\14\0.175	chr1	109434925	109441077	Ensembl predicted genes	TMEM167B
ASYNC_382\106\2.65	chr1	109444337	109444757	Ensembl predicted genes	SCARNA2
ASYNC_573\45\1.125	chr1	153450239	153463949	Ensembl predicted genes	GBAP
ASYNC_574\19\0.316	chr1	153450239	153463949	Ensembl predicted genes	GBAP
ASYNC_575\19\0.475	chr1	153450239	153463949	Ensembl predicted genes	GBAP
ASYNC_576\15\0.375	chr1	153450239	153463949	Ensembl predicted genes	GBAP
ASYNC_771\16\0.4	chr1	200403801	200425200	Ensembl predicted genes	PTPRV
ASYNC_810\20\0.5	chr1	209622783	209672499	Ensembl predicted genes	C1orf97
ASYNC_984\14\0.35	chr2	32904013	33007710	Ensembl predicted genes	LOC285045
ASYNC_1164\17\0.283	chr2	110326394	110337806	Ensembl predicted genes	NCRNA00116
ASYNC_1312\96\2.4	chr2	242225699	242261944	Ensembl predicted genes	ATG4B|ATG4B
ASYNC_1313\21\0.525	chr2	242263829	242274900	Ensembl predicted genes	DTYMK
ASYNC_1552\16\0.4	chr3	127118133	127131555	Ensembl predicted genes	LOC100125556|LOC100125556
ASYNC_1574\18\0.18	chr3	131299314	131312966	Ensembl predicted genes	LOC729375
ASYNC_1921\15\0.25	chr5	1625074	1647646	Ensembl predicted genes	SDHAP3
ASYNC_1922\43\0.716	chr5	1650671	1687120	Ensembl predicted genes	LOC728613
ASYNC_2008\15\0.25	chr5	9694427	9956936	Ensembl predicted genes	LOC285692
ASYNC_2175\60\0.428	chr5	21495345	21625236	Ensembl predicted genes	LOC728411|LOC728411|LOC728411
ASYNC_2176\19\0.475	chr5	21495345	21625236	Ensembl predicted genes	LOC728411|LOC728411|LOC728411
ASYNC_2177\19\0.475	chr5	21495345	21625236	Ensembl predicted genes	LOC728411|LOC728411|LOC728411
ASYNC_2178\24\0.12	chr5	21495345	21625236	Ensembl predicted genes	LOC728411|LOC728411|LOC728411
ASYNC_2179\15\0.375	chr5	21495345	21625236	Ensembl predicted genes	LOC728411|LOC728411|LOC728411
ASYNC_2180\16\0.4	chr5	21495345	21625236	Ensembl predicted genes	LOC728411|LOC728411|LOC728411
ASYNC_2181\18\0.45	chr5	21495345	21625236	Ensembl predicted genes	LOC728411|LOC728411|LOC728411
ASYNC_2182\16\0.4	chr5	21495345	21625236	Ensembl predicted genes	LOC728411|LOC728411|LOC728411
ASYNC_2183\25\0.208	chr5	21495345	21625236	Ensembl predicted genes	LOC728411|LOC728411|LOC728411
ASYNC_2184\14\0.35	chr5	21495345	21625236	Ensembl predicted genes	LOC728411|LOC728411|LOC728411
ASYNC_2185\14\0.35	chr5	21495345	21625236	Ensembl predicted genes	LOC728411|LOC728411|LOC728411
ASYNC_2597\21\0.525	chr5	68549328	68561741	Ensembl predicted genes	MRPS36
ASYNC_2598\36\0.6	chr5	68683308	68701596	Ensembl predicted genes	TAF9|TAF9|TAF9|TAF9
ASYNC_2599\60\1.5	chr5	68683308	68701596	Ensembl predicted genes	TAF9|TAF9|TAF9|TAF9
ASYNC_2601\88\1.466	chr5	70787197	70899405	Ensembl predicted genes	BDP1
ASYNC_2602\18\0.45	chr5	70787197	70899405	Ensembl predicted genes	BDP1
ASYNC_2869\20\0.333	chr6	27433581	27451132	Ensembl predicted genes	ZNF204|ZNF204
ASYNC_2885\34\0.566	chr6	28647385	28663091	Ensembl predicted genes	SCAND3
ASYNC_2887\14\0.233	chr6	28978757	28999747	Ensembl predicted genes	TRIM27
ASYNC_2890\64\1.6	chr6	30018304	30136940	Ensembl predicted genes	NCRNA00171|HLA-J|HLA-A29.1|HLA-A
ASYNC_2891\47\0.783	chr6	30142910	30146087	Ensembl predicted genes	PPP1R11
ASYNC_2892\18\0.45	chr6	30363152	30402906	Ensembl predicted genes	HCG18|HCG18
ASYNC_2893\21\0.262	chr6	30363152	30402906	Ensembl predicted genes	HCG18|HCG18
ASYNC_2894\18\0.3	chr6	30363152	30402906	Ensembl predicted genes	HCG18|HCG18
ASYNC_2895\20\0.5	chr6	30363152	30402906	Ensembl predicted genes	HCG18|HCG18
ASYNC_2896\112\2.8	chr6	30420915	30422611	Ensembl predicted genes	RPP21
ASYNC_2897\14\0.35	chr6	30621672	30632987	Ensembl predicted genes	GNL1
ASYNC_2898\28\0.7	chr6	30621672	30632987	Ensembl predicted genes	GNL1
ASYNC_2899\26\0.65	chr6	30621672	30632987	Ensembl predicted genes	GNL1
ASYNC_2900\15\0.187	chr6	30647148	30667288	Ensembl predicted genes	ABCF1|ABCF1
ASYNC_2901\23\0.127	chr6	30676160	30692999	Ensembl predicted genes	PPP1R10
ASYNC_2902\21\0.21	chr6	30693464	30702153	Ensembl predicted genes	MRPS18B
ASYNC_2903\43\0.716	chr6	30728885	30748736	Ensembl predicted genes	DHX16
ASYNC_2904\47\0.391	chr6	30775562	30793437	Ensembl predicted genes	MDC1
ASYNC_2906\208\5.2	chr6	30983955	30989859	Ensembl predicted genes	GTF2H4
ASYNC_2907\20\0.5	chr6	30983955	30989859	Ensembl predicted genes	GTF2H4
ASYNC_2908\24\0.6	chr6	31605974	31618204	Ensembl predicted genes	BAT1|BAT1|SNORD84
ASYNC_2909\19\0.475	chr6	31605974	31618204	Ensembl predicted genes	BAT1|BAT1|SNORD84
ASYNC_2910\131\3.275	chr6	31622606	31634584	Ensembl predicted genes	NFKBIL1|NFKBIL1|NFKBIL1|NFKBIL1
ASYNC_2912\25\0.208	chr6	31714783	31728456	Ensembl predicted genes	BAT3|BAT3|BAT3|BAT3
ASYNC_2914\18\0.128	chr6	31734053	31736528	Ensembl predicted genes	C6orf47
ASYNC_2915\15\0.375	chr6	31737840	31741142	Ensembl predicted genes	BAT4
ASYNC_2916\195\4.875	chr6	31741635	31745822	Ensembl predicted genes	CSNK2B
ASYNC_2917\19\0.475	chr6	31762714	31779067	Ensembl predicted genes	BAT5
ASYNC_2918\25\0.625	chr6	31853275	31871691	Ensembl predicted genes	VARS
ASYNC_2919\19\0.475	chr6	31873152	31882722	Ensembl predicted genes	LSM2
ASYNC_2921\25\0.416	chr6	31910671	31915520	Ensembl predicted genes	C6orf48|C6orf48|SNORD48
ASYNC_2922\15\0.25	chr6	31934807	31938688	Ensembl predicted genes	NEU1
ASYNC_2925\139\3.475	chr6	32027842	32034843	Ensembl predicted genes	RDBP
ASYNC_2926\14\0.233	chr6	32034559	32045511	Ensembl predicted genes	SKIV2L
ASYNC_2927\23\0.575	chr6	32045566	32048011	Ensembl predicted genes	DOM3Z
ASYNC_2928\51\0.85	chr6	32045566	32048011	Ensembl predicted genes	DOM3Z
ASYNC_2930\29\0.207	chr6	32204461	32206045	Ensembl predicted genes	FKBPL
ASYNC_2931\27\0.45	chr6	32204461	32206045	Ensembl predicted genes	FKBPL
ASYNC_2932\25\0.625	chr6	32266520	32299822	Ensembl predicted genes	NOTCH4|GPSM3
ASYNC_2933\16\0.4	chr6	33044414	33057260	Ensembl predicted genes	BRD2|BRD2
ASYNC_2934\52\0.866	chr6	33269342	33276410	Ensembl predicted genes	RXRB
ASYNC_2935\22\0.55	chr6	33269342	33276410	Ensembl predicted genes	RXRB
ASYNC_2936\53\1.325	chr6	33276580	33280192	Ensembl predicted genes	SLC39A7|SLC39A7
ASYNC_2937\33\0.825	chr6	33326026	33347640	Ensembl predicted genes	VPS52
ASYNC_2938\46\1.15	chr6	33347829	33352259	Ensembl predicted genes	RPS18
ASYNC_2939\26\0.433	chr6	33352894	33354580	Ensembl predicted genes	B3GALT4
ASYNC_2940\41\0.683	chr6	33354862	33364969	Ensembl predicted genes	WDR46
ASYNC_2941\91\2.275	chr6	33365355	33366689	Ensembl predicted genes	PFDN6
ASYNC_2943\54\1.35	chr6	33394312	33398771	Ensembl predicted genes	DAXX|DAXX|DAXX|DAXX
ASYNC_2945\14\0.35	chr6	33467290	33485677	Ensembl predicted genes	KIFC1
ASYNC_3020\21\0.525	chr6	58354117	58395683	Ensembl predicted genes	GUSBL2
ASYNC_3174\22\0.366	chr7	4980141	5004326	Ensembl predicted genes	RNF216L|RNF216L|RNF216L
ASYNC_3181\135\3.375	chr7	5829316	5860592	Ensembl predicted genes	ZNF815
ASYNC_3279\69\0.575	chr7	43947018	44025273	Ensembl predicted genes	POLR2J4
ASYNC_3290\15\0.375	chr7	44989151	44992784	Ensembl predicted genes	C7orf40|SNORA9
ASYNC_3292\53\0.883	chr7	45729914	45775142	Ensembl predicted genes	2013-09-01
ASYNC_3369\55\0.916	chr7	97433843	97439574	Ensembl predicted genes	MGC72080
ASYNC_3446\107\2.675	chr7	112544010	112545873	Ensembl predicted genes	LOC401397|LOC401397
ASYNC_3488\14\0.233	chr7	137633403	137633769	Ensembl predicted genes	LOC442726
ASYNC_3515\48\1.2	chr7	148875177	148952751	Ensembl predicted genes	ZNF767
ASYNC_3744\17\0.283	chr8	128875960	129182681	Ensembl predicted genes	PVT1
ASYNC_4162\132\1.65	chr10	42328968	42368286	Ensembl predicted genes	ZNF37B
ASYNC_4168\36\0.6	chr10	43252579	43298013	Ensembl predicted genes	ZNF487
ASYNC_4169\19\0.475	chr10	43252579	43298013	Ensembl predicted genes	ZNF487
ASYNC_4187\14\0.35	chr10	62299205	62431204	Ensembl predicted genes	RHOBTB1|RHOBTB1
ASYNC_4225\31\0.775	chr10	75128914	75160286	Ensembl predicted genes	BMS1P4
ASYNC_4226\79\1.975	chr10	75128914	75160286	Ensembl predicted genes	BMS1P4
ASYNC_4248\17\0.425	chr10	88988405	89092295	Ensembl predicted genes	LOC728190
ASYNC_4416\14\0.35	chr11	17329892	17355445	Ensembl predicted genes	DKFZp686O24166
ASYNC_4639\234\5.85	chr11	66841885	66915734	Ensembl predicted genes	LOC100130987
ASYNC_5234\86\2.15	chr13	51639847	51666603	Ensembl predicted genes	THSD1P
ASYNC_5246\19\0.19	chr13	90798074	90804830	Ensembl predicted genes	MIRHG1|MIRHG1
ASYNC_5720\65\0.541	chr15	82975694	82986698	Ensembl predicted genes	SCAND2|SCAND2
ASYNC_5767\24\0.6	chr15	100318538	100334331	Ensembl predicted genes	WASH3P
ASYNC_5923\14\0.233	chr16	21365505	21421053	Ensembl predicted genes	LOC100271836
ASYNC_6040\14\0.233	chr16	31619434	31626246	Ensembl predicted genes	C16orf67
ASYNC_6179\18\0.45	chr16	72923804	72959654	Ensembl predicted genes	LOC283922
ASYNC_6397\17\0.425	chr17	21828188	21837197	Ensembl predicted genes	FLJ36000
ASYNC_6666\55\1.375	chr17	72596319	72602662	Ensembl predicted genes	C17orf86|SCARNA16
ASYNC_6694\22\0.157	chr17	77394322	77411833	Ensembl predicted genes	P4HB
ASYNC_6719\33\0.55	chr18	5226723	5228028	Ensembl predicted genes	C18orf18
ASYNC_6775\21\0.21	chr18	70409991	70416051	Ensembl predicted genes	LOC400657
ASYNC_6914\18\0.45	chr19	10013031	10045811	Ensembl predicted genes	LOC388503|CPLP
ASYNC_7053\201\5.025	chr19	19728182	19748222	Ensembl predicted genes	LOC284440
ASYNC_7057\43\1.075	chr19	32973241	32976688	Ensembl predicted genes	LOC148189
ASYNC_7058\104\2.6	chr19	32973241	32976688	Ensembl predicted genes	LOC148189
ASYNC_7490\25\0.312	chr20	18496072	18498201	Ensembl predicted genes	LOC388789
ASYNC_7491\92\1.533	chr20	18716614	18723228	Ensembl predicted genes	HSPC072|HSPC072
ASYNC_7505\26\0.65	chr20	25938434	25950430	Ensembl predicted genes	LOC100134868
ASYNC_7576\116\2.9	chr20	36482652	36497432	Ensembl predicted genes	LOC388796|LOC388796|SNORA71D
ASYNC_7577\103\2.575	chr20	36508710	36512978	Ensembl predicted genes	SNHG11|SNORA39
ASYNC_7715\15\0.375	chr21	16364712	16901413	Ensembl predicted genes	C21orf34|C21orf34
ASYNC_7804\96\2.4	chr22	22310675	22389610	Ensembl predicted genes	LOC91316
ASYNC_7902\15\0.375	chrX	15602959	15631395	Ensembl predicted genes	CA5BP
ASYNC_7903\23\0.164	chrX	15602959	15631395	Ensembl predicted genes	CA5BP
ASYNC_8015\69\0.862	chrX	73080883	73206936	Ensembl predicted genes	LOC554203
ASYNC_8042\26\0.26	chrX	119254335	119263150	Ensembl predicted genes	CXorf42
ASYNC_349\18\0.45	chr1	94085717	94085801	tRNA	chr1_9_tRNAArg_TCT_I+
ASYNC_786\17\0.425	chr1	202742781	202742853	tRNA	chr1_62_tRNALys_TTT-
ASYNC_650\14\0.35	chr1	159658507	159658578	tRNA	chr1_84_tRNAGlu_TTC-
ASYNC_648\14\0.233	chr1	159636114	159636186	tRNA	chr1_85_tRNAVal_CAC-
ASYNC_1207\14\0.35	chr2	156965527	156965598	tRNA	chr2_13_tRNAAla_CGC+
ASYNC_2867\15\0.107	chr6	27096104	27096197	tRNA	chr6_29_tRNAIle_TAT_I+
ASYNC_2864\17\0.425	chr6	26641124	26641197	tRNA	chr6_167_tRNAThr_AGT-
ASYNC_3634\14\0.233	chr8	67188777	67188865	tRNA	chr8_5_tRNATyr_GTA_I+
ASYNC_4191\16\0.1	chr10	69194267	69194348	tRNA	chr10_2_tRNASer_TGA+
ASYNC_5156\17\0.425	chr12	123990465	123990536	tRNA	chr12_8_tRNAAla_TGC+
ASYNC_5218\35\0.875	chr13	44390062	44390133	tRNA	chr13_3_tRNAGlu_TTC-
ASYNC_6077\20\0.333	chr16	55891893	55891975	tRNA	chr16_26_tRNALeu_CAG-
ASYNC_5929\18\0.45	chr16	22114533	22114614	tRNA	chr16_27_tRNALeu_TAG-
ASYNC_6387\26\0.433	chr17	19352086	19352157	tRNA	chr17_12_tRNATrp_CCA+
ASYNC_6617\16\0.4	chr17	63446475	63446547	tRNA	chr17_23_tRNAArg_CCG-
ASYNC_66\18\0.45	chr1	11890797	11890916	RNA	U5E
ASYNC_85\20\0.5	chr1	16713203	16713367	RNA	U1
ASYNC_95\16\0.114	chr1	17095061	17095225	RNA	U1
ASYNC_504\16\0.16	chr1	147490681	147490845	RNA	U1
ASYNC_505\15\0.375	chr1	147490681	147490845	RNA	U1
ASYNC_2726\14\0.35	chr5	140078694	140078782	RNA	HVG-2
ASYNC_5117\27\0.135	chr12	119213945	119214089	RNA	U4
ASYNC_5118\16\0.114	chr12	119215279	119215423	RNA	U4
ASYNC_5359\18\0.45	chr14	49399018	49399317	RNA	SRP_RNA
ASYNC_5642\20\0.111	chr15	63375441	63375558	RNA	U5A
ASYNC_70\19\0.475	chr1	11892102	11892568	RNA	blat|chr1:234093288-234093370|U5E-related
ASYNC_503\48\0.6	chr1	146608088	146608195	RNA	blat|chr6:36715321-36715427|U1-related
ASYNC_856\21\0.525	chr1	226823482	226823903	RNA	blat|chr6:152652773-152652861|5S_rRNA-related
ASYNC_2693\14\0.35	chr5	135444076	135444196	miRNA	hsa-mir-886
ASYNC_1314\16\0.4	chr2	242263829	242275056	Refseq_NR genes	NR_033255|-
ASYNC_1660\16\0.4	chr3	171144467	171167216	Refseq_NR genes	NR_027622|-
ASYNC_1768\21\0.525	chr4	6726721	6728675	Refseq_NR genes	NR_015433|+
ASYNC_2942\21\0.525	chr6	33367409	33375154	Refseq_NR genes	NR_028387|-
ASYNC_3345\33\0.165	chr7	76016593	76095235	Refseq_NR genes	NR_029411|+
ASYNC_4244\78\1.95	chr10	81575637	81577335	Refseq_NR genes	NR_029407|+
ASYNC_4249\55\1.375	chr10	89092147	89093310	Refseq_NR genes	NR_029408|+
ASYNC_5194\15\0.375	chr13	27608980	27611311	Refseq_NR genes	NR_029383|-
ASYNC_6507\29\0.207	chr17	38802738	38821792	Refseq_NR genes	NR_027412|-
ASYNC_7556\104\2.6	chr20	34096955	34102296	Refseq_NR genes	NR_027451|-
ASYNC_1\37\0.925	chr1	80279	703890	SIB predicted genes	HTR000415.1.6(-)
ASYNC_48\59\1.475	chr1	9409301	9423208	SIB predicted genes	HTR048458.1.285(-)
ASYNC_67\21\0.131	chr1	11890810	11907710	SIB predicted genes	HTR048461.1.344(+)
ASYNC_68\17\0.425	chr1	11890810	11907710	SIB predicted genes	HTR048461.1.344(+)
ASYNC_69\17\0.425	chr1	11890810	11907710	SIB predicted genes	HTR048461.1.344(+)
ASYNC_93\90\2.25	chr1	16817332	16844581	SIB predicted genes	HTR021929.1.468(-)
ASYNC_96\18\0.128	chr1	17094818	17172061	SIB predicted genes	HTR006665.1.485(+)
ASYNC_130\16\0.266	chr1	24163423	24180463	SIB predicted genes	HTR000569.1.640(-)
ASYNC_174\16\0.4	chr1	28788418	28847353	SIB predicted genes	HTR006553.1.782(-)
ASYNC_265\20\0.5	chr1	44873496	44970440	SIB predicted genes	HTR010824.1.1170(-)
ASYNC_290\14\0.35	chr1	51756568	51799221	SIB predicted genes	HTR045931.1.1309(+)
ASYNC_355\14\0.233	chr1	96285187	96319600	SIB predicted genes	HTR065957.1.1882(+)
ASYNC_367\15\0.25	chr1	106271768	106372398	SIB predicted genes	HTR032793.1.1977(-)
ASYNC_390\16\0.4	chr1	110172499	110215581	SIB predicted genes	HTR045949.1.2049(+)
ASYNC_406\14\0.35	chr1	113190943	113389880	SIB predicted genes	HTR049697.1.2137(+)
ASYNC_417\39\0.975	chr1	114865539	115039762	SIB predicted genes	HTR000738.1.2168(-)
ASYNC_426\14\0.35	chr1	119484541	119620390	SIB predicted genes	HTR019294.1.2237(+)
ASYNC_431\51\1.275	chr1	141528397	142099530	SIB predicted genes	HTR045612.1.2286(+)
ASYNC_432\16\0.4	chr1	141528397	142099530	SIB predicted genes	HTR045612.1.2286(+)
ASYNC_433\18\0.45	chr1	141528397	142099530	SIB predicted genes	HTR045612.1.2286(+)
ASYNC_434\28\0.7	chr1	142195837	142309179	SIB predicted genes	HTR018829.1.2301(-)
ASYNC_435\16\0.266	chr1	142624797	142805834	SIB predicted genes	HTR020843.1.2319(+)
ASYNC_436\14\0.233	chr1	142624797	142805834	SIB predicted genes	HTR020843.1.2319(+)
ASYNC_437\16\0.4	chr1	142624797	142805834	SIB predicted genes	HTR020843.1.2319(+)
ASYNC_438\23\0.575	chr1	142624797	142805834	SIB predicted genes	HTR020843.1.2319(+)
ASYNC_439\14\0.233	chr1	142624797	142805834	SIB predicted genes	HTR020843.1.2319(+)
ASYNC_440\15\0.375	chr1	142858010	147024930	SIB predicted genes	HTR013067.1.2327(+)
ASYNC_441\18\0.45	chr1	142858010	147024930	SIB predicted genes	HTR013067.1.2327(+)
ASYNC_442\14\0.233	chr1	142858010	147024930	SIB predicted genes	HTR013067.1.2327(+)
ASYNC_443\36\0.9	chr1	142858010	147024930	SIB predicted genes	HTR013067.1.2327(+)
ASYNC_473\18\0.45	chr1	142858010	147024930	SIB predicted genes	HTR013067.1.2327(+)
ASYNC_474\14\0.14	chr1	142858010	147024930	SIB predicted genes	HTR013067.1.2327(+)
ASYNC_482\14\0.35	chr1	142858010	147024930	SIB predicted genes	HTR013067.1.2327(+)
ASYNC_488\19\0.158	chr1	142858010	147024930	SIB predicted genes	HTR013067.1.2327(+)
ASYNC_489\31\0.516	chr1	142858010	147024930	SIB predicted genes	HTR013067.1.2327(+)
ASYNC_494\14\0.35	chr1	142858010	147024930	SIB predicted genes	HTR013067.1.2327(+)
ASYNC_495\15\0.375	chr1	142858010	147024930	SIB predicted genes	HTR013067.1.2327(+)
ASYNC_501\17\0.425	chr1	142858010	147024930	SIB predicted genes	HTR013067.1.2327(+)
ASYNC_502\29\0.483	chr1	142858010	147024930	SIB predicted genes	HTR013067.1.2327(+)
ASYNC_506\21\0.525	chr1	147401641	147549775	SIB predicted genes	HTR019931.1.2427(+)
ASYNC_611\17\0.283	chr1	154828162	154852272	SIB predicted genes	HTR012210.1.2808(+)
ASYNC_626\96\2.4	chr1	156377141	156388464	SIB predicted genes	HTR064790.1.2849(+)
ASYNC_627\15\0.375	chr1	156377141	156388464	SIB predicted genes	HTR064790.1.2849(+)
ASYNC_647\14\0.35	chr1	159626606	159658838	SIB predicted genes	HTR064239.1.2969(+)
ASYNC_649\15\0.375	chr1	159626606	159658838	SIB predicted genes	HTR064239.1.2969(+)
ASYNC_657\16\0.266	chr1	161347534	161558307	SIB predicted genes	HTR000778.1.3008(-)
ASYNC_701\14\0.233	chr1	172252203	172258816	SIB predicted genes	HTR020453.1.3194(-)
ASYNC_711\14\0.35	chr1	175587344	175602216	SIB predicted genes	HTR035474.1.3228(+)
ASYNC_712\14\0.35	chr1	175628444	175980663	SIB predicted genes	HTR030340.1.3229(-)
ASYNC_713\44\1.1	chr1	176163323	176273925	SIB predicted genes	HTR002875.1.3231(-)
ASYNC_725\14\0.35	chr1	180365067	180480157	SIB predicted genes	HTR039750.1.3305(-)
ASYNC_761\15\0.187	chr1	197251884	197312487	SIB predicted genes	HTR040224.1.3471(+)
ASYNC_770\19\0.316	chr1	200104436	200779475	SIB predicted genes	HTR062900.1.3521(+)
ASYNC_778\74\1.85	chr1	201448577	201509392	SIB predicted genes	HTR009634.1.3572(-)
ASYNC_804\30\0.75	chr1	205369804	205412032	SIB predicted genes	HTR032783.1.3692(-)
ASYNC_806\14\0.35	chr1	207450448	207468251	SIB predicted genes	HTR066041.1.3722(-)
ASYNC_815\14\0.233	chr1	210797797	210798994	SIB predicted genes	HTR057622.1.3785(-)
ASYNC_833\28\0.127	chr1	222237356	222246969	SIB predicted genes	HTR061400.1.3928(-)
ASYNC_869\19\0.475	chr1	232848656	232885545	SIB predicted genes	HTR017136.1.4149(+)
ASYNC_884\14\0.175	chr1	237616487	238139537	SIB predicted genes	HTR007608.1.4212(+)
ASYNC_898\29\0.725	chr1	245069008	245161903	SIB predicted genes	HTR002154.1.4304(-)
ASYNC_917\14\0.233	chr2	9815075	9827921	SIB predicted genes	HTR019593.2.159(-)
ASYNC_929\24\0.6	chr2	20311189	20415476	SIB predicted genes	HTR004899.2.286(-)
ASYNC_932\25\0.625	chr2	23451604	23457675	SIB predicted genes	HTR064844.2.321(-)
ASYNC_986\72\1.8	chr2	36612060	36726734	SIB predicted genes	HTR003167.2.536(-)
ASYNC_989\55\1.375	chr2	37330699	37405455	SIB predicted genes	HTR006583.2.551(-)
ASYNC_990\42\1.05	chr2	38005965	38147789	SIB predicted genes	HTR007520.2.571(+)
ASYNC_996\14\0.233	chr2	42016011	42095647	SIB predicted genes	HTR049915.2.634(-)
ASYNC_1010\14\0.35	chr2	46509837	46581921	SIB predicted genes	HTR040832.2.710(+)
ASYNC_1012\14\0.35	chr2	48022338	48321645	SIB predicted genes	HTR040838.2.751(-)
ASYNC_1093\143\3.575	chr2	85474909	85499066	SIB predicted genes	HTR007872.2.1228(-)
ASYNC_1094\120\3	chr2	85499354	85517663	SIB predicted genes	HTR022018.2.1229(+)
ASYNC_1106\26\0.433	chr2	88619352	88656273	SIB predicted genes	HTR040872.2.1299(+)
ASYNC_1108\15\0.375	chr2	91020674	91056753	SIB predicted genes	HTR058984.2.1335(-)
ASYNC_1109\14\0.35	chr2	91114572	91132647	SIB predicted genes	HTR021949.2.1338(+)
ASYNC_1110\15\0.375	chr2	91114572	91132647	SIB predicted genes	HTR021949.2.1338(+)
ASYNC_1114\14\0.175	chr2	91138407	91211814	SIB predicted genes	HTR061694.2.1339(-)
ASYNC_1115\16\0.133	chr2	91138407	91211814	SIB predicted genes	HTR061694.2.1339(-)
ASYNC_1116\14\0.35	chr2	91138407	91211814	SIB predicted genes	HTR061694.2.1339(-)
ASYNC_1117\17\0.425	chr2	91138407	91211814	SIB predicted genes	HTR061694.2.1339(-)
ASYNC_1118\14\0.175	chr2	91138407	91211814	SIB predicted genes	HTR061694.2.1339(-)
ASYNC_1119\14\0.35	chr2	91138407	91211814	SIB predicted genes	HTR061694.2.1339(-)
ASYNC_1120\23\0.575	chr2	91138407	91211814	SIB predicted genes	HTR061694.2.1339(-)
ASYNC_1121\14\0.35	chr2	91138407	91211814	SIB predicted genes	HTR061694.2.1339(-)
ASYNC_1122\19\0.135	chr2	91138407	91211814	SIB predicted genes	HTR061694.2.1339(-)
ASYNC_1123\15\0.375	chr2	91138407	91211814	SIB predicted genes	HTR061694.2.1339(-)
ASYNC_1124\23\0.383	chr2	91138407	91211814	SIB predicted genes	HTR061694.2.1339(-)
ASYNC_1125\14\0.35	chr2	91138407	91211814	SIB predicted genes	HTR061694.2.1339(-)
ASYNC_1126\17\0.17	chr2	91138407	91211814	SIB predicted genes	HTR061694.2.1339(-)
ASYNC_1127\16\0.4	chr2	91138407	91211814	SIB predicted genes	HTR061694.2.1339(-)
ASYNC_1128\14\0.233	chr2	91138407	91211814	SIB predicted genes	HTR061694.2.1339(-)
ASYNC_1129\14\0.35	chr2	91138407	91211814	SIB predicted genes	HTR061694.2.1339(-)
ASYNC_1130\21\0.525	chr2	91138407	91211814	SIB predicted genes	HTR061694.2.1339(-)
ASYNC_1131\16\0.114	chr2	91138407	91211814	SIB predicted genes	HTR061694.2.1339(-)
ASYNC_1135\42\1.05	chr2	95237009	95289249	SIB predicted genes	HTR035886.2.1371(+)
ASYNC_1188\18\0.15	chr2	132735185	132737098	SIB predicted genes	HTR062032.2.1984(+)
ASYNC_1189\18\0.45	chr2	132735185	132737098	SIB predicted genes	HTR062032.2.1984(+)
ASYNC_1196\129\0.921	chr2	132777324	132891643	SIB predicted genes	HTR056793.2.1987(+)
ASYNC_1210\38\0.95	chr2	161846958	161847375	SIB predicted genes	HTR062658.2.2233(+)
ASYNC_1238\19\0.475	chr2	191532229	191593931	SIB predicted genes	HTR001280.2.2589(-)
ASYNC_1296\55\1.375	chr2	234147109	234151219	SIB predicted genes	HTR016006.2.3187(+)
ASYNC_1311\18\0.3	chr2	242172492	242225537	SIB predicted genes	HTR044008.2.3347(-)
ASYNC_1351\36\0.9	chr3	15074738	15480268	SIB predicted genes	HTR064041.3.219(-)
ASYNC_1367\14\0.35	chr3	34892290	35410519	SIB predicted genes	HTR041377.3.404(-)
ASYNC_1392\25\0.625	chr3	44507117	44527126	SIB predicted genes	HTR019446.3.542(-)
ASYNC_1449\36\0.6	chr3	50238727	50275934	SIB predicted genes	HTR002537.3.734(+)
ASYNC_1480\14\0.233	chr3	54023186	54043147	SIB predicted genes	HTR041345.3.842(-)
ASYNC_1560\39\0.975	chr3	129818321	129882639	SIB predicted genes	HTR014859.3.1646(-)
ASYNC_1561\20\0.5	chr3	129818321	129882639	SIB predicted genes	HTR014859.3.1646(-)
ASYNC_1590\211\5.275	chr3	142468885	142568669	SIB predicted genes	HTR060957.3.1864(-)
ASYNC_1604\14\0.35	chr3	150621009	150703873	SIB predicted genes	HTR008322.3.1969(+)
ASYNC_1608\18\0.3	chr3	151239691	151414206	SIB predicted genes	HTR036097.3.1981(+)
ASYNC_1616\14\0.35	chr3	151962437	152043865	SIB predicted genes	HTR041321.3.1998(+)
ASYNC_1631\46\1.15	chr3	158375380	158516628	SIB predicted genes	HTR036104.3.2091(+)
ASYNC_1642\14\0.35	chr3	161113882	161425780	SIB predicted genes	HTR060719.3.2112(-)
ASYNC_1665\14\0.233	chr3	171667766	171955688	SIB predicted genes	HTR024203.3.2210(+)
ASYNC_1673\19\0.135	chr3	175617140	175938230	SIB predicted genes	HTR034040.3.2256(+)
ASYNC_1674\14\0.35	chr3	175617140	175938230	SIB predicted genes	HTR034040.3.2256(+)
ASYNC_1706\40\0.666	chr3	186483422	186529745	SIB predicted genes	HTR044427.3.2418(+)
ASYNC_1722\29\0.725	chr3	197153118	197216488	SIB predicted genes	HTR062031.3.2592(+)
ASYNC_1742\15\0.25	chr4	18125	41583	SIB predicted genes	HTR034151.4.0(-)
ASYNC_1756\62\1.55	chr4	2507199	2704100	SIB predicted genes	HTR005276.4.86(+)
ASYNC_1757\198\4.95	chr4	2507199	2704100	SIB predicted genes	HTR005276.4.86(+)
ASYNC_1773\40\1	chr4	7100319	7151522	SIB predicted genes	HTR041908.4.189(+)
ASYNC_1779\14\0.35	chr4	14082767	14498891	SIB predicted genes	HTR034176.4.288(-)
ASYNC_1843\34\0.85	chr4	119725447	119797723	SIB predicted genes	HTR015958.4.1342(+)
ASYNC_1847\61\1.525	chr4	120590171	120595232	SIB predicted genes	HTR061398.4.1367(-)
ASYNC_1850\19\0.316	chr4	123292937	123503364	SIB predicted genes	HTR019782.4.1403(+)
ASYNC_1884\23\0.575	chr4	185487644	185512124	SIB predicted genes	HTR017103.4.1994(-)
ASYNC_1885\59\0.983	chr4	185664239	185695731	SIB predicted genes	HTR031490.4.1997(-)
ASYNC_1890\14\0.233	chr5	136264	138961	SIB predicted genes	HTR063542.5.1(-)
ASYNC_1891\14\0.233	chr5	145265	192978	SIB predicted genes	HTR042112.5.2(+)
ASYNC_1895\17\0.425	chr5	317434	491406	SIB predicted genes	HTR000680.5.9(+)
ASYNC_1914\14\0.35	chr5	999429	1009635	SIB predicted genes	HTR066666.5.35(+)
ASYNC_1920\15\0.25	chr5	1620596	1689789	SIB predicted genes	HTR042113.5.57(-)
ASYNC_1933\14\0.233	chr5	2884134	2888253	SIB predicted genes	HTR066670.5.83(-)
ASYNC_1940\18\0.45	chr5	3470261	3589208	SIB predicted genes	HTR026169.5.87(-)
ASYNC_1944\14\0.233	chr5	4158682	4196965	SIB predicted genes	HTR041980.5.95(-)
ASYNC_1946\15\0.375	chr5	4505151	4668927	SIB predicted genes	HTR050546.5.97(-)
ASYNC_1948\16\0.4	chr5	4813746	4919318	SIB predicted genes	HTR034237.5.102(-)
ASYNC_1949\15\0.25	chr5	4813746	4919318	SIB predicted genes	HTR034237.5.102(-)
ASYNC_1958\16\0.4	chr5	5437217	5543347	SIB predicted genes	HTR031839.5.115(+)
ASYNC_1982\14\0.35	chr5	6819003	6825066	SIB predicted genes	HTR066678.5.133(+)
ASYNC_1983\14\0.35	chr5	6819003	6825066	SIB predicted genes	HTR066678.5.133(+)
ASYNC_1984\14\0.233	chr5	6848992	6879841	SIB predicted genes	HTR066679.5.135(+)
ASYNC_1985\14\0.35	chr5	6921671	6939900	SIB predicted genes	HTR066680.5.136(+)
ASYNC_1999\23\0.575	chr5	8386595	8510677	SIB predicted genes	HTR031840.5.158(-)
ASYNC_2000\17\0.283	chr5	8503823	8516209	SIB predicted genes	HTR018031.5.157(+)
ASYNC_2001\15\0.187	chr5	8503823	8516209	SIB predicted genes	HTR018031.5.157(+)
ASYNC_2011\15\0.375	chr5	10190249	10243855	SIB predicted genes	HTR030884.5.233(+)
ASYNC_2012\15\0.375	chr5	10190249	10243855	SIB predicted genes	HTR030884.5.233(+)
ASYNC_2020\16\0.266	chr5	10369239	10383167	SIB predicted genes	HTR042219.5.248(+)
ASYNC_2027\15\0.25	chr5	10617434	10703225	SIB predicted genes	HTR028844.5.262(+)
ASYNC_2060\15\0.375	chr5	13743436	14064847	SIB predicted genes	HTR004496.5.301(-)
ASYNC_2093\16\0.4	chr5	15244754	15319669	SIB predicted genes	HTR026197.5.324(-)
ASYNC_2094\16\0.266	chr5	15244754	15319669	SIB predicted genes	HTR026197.5.324(-)
ASYNC_2120\15\0.375	chr5	17457126	17494803	SIB predicted genes	HTR032293.5.354(+)
ASYNC_2124\14\0.35	chr5	17703080	17726893	SIB predicted genes	HTR054434.5.385(-)
ASYNC_2125\15\0.375	chr5	17703080	17726893	SIB predicted genes	HTR054434.5.385(-)
ASYNC_2131\17\0.283	chr5	17825076	17991703	SIB predicted genes	HTR055864.5.386(+)
ASYNC_2132\15\0.375	chr5	17825076	17991703	SIB predicted genes	HTR055864.5.386(+)
ASYNC_2133\17\0.425	chr5	17825076	17991703	SIB predicted genes	HTR055864.5.386(+)
ASYNC_2167\14\0.35	chr5	20341430	20367381	SIB predicted genes	HTR041974.5.393(+)
ASYNC_2171\14\0.35	chr5	20986746	21152444	SIB predicted genes	HTR042309.5.400(-)
ASYNC_2172\16\0.4	chr5	20986746	21152444	SIB predicted genes	HTR042309.5.400(-)
ASYNC_2173\15\0.375	chr5	20986746	21152444	SIB predicted genes	HTR042309.5.400(-)
ASYNC_2174\15\0.25	chr5	21175060	21377219	SIB predicted genes	HTR066693.5.401(-)
ASYNC_2186\17\0.425	chr5	21652127	21815752	SIB predicted genes	HTR020571.5.412(+)
ASYNC_2187\15\0.25	chr5	21652127	21815752	SIB predicted genes	HTR020571.5.412(+)
ASYNC_2214\19\0.475	chr5	24011860	24214131	SIB predicted genes	HTR024395.5.416(+)
ASYNC_2215\14\0.35	chr5	24011860	24214131	SIB predicted genes	HTR024395.5.416(+)
ASYNC_2216\14\0.35	chr5	24011860	24214131	SIB predicted genes	HTR024395.5.416(+)
ASYNC_2217\15\0.375	chr5	24011860	24214131	SIB predicted genes	HTR024395.5.416(+)
ASYNC_2218\14\0.233	chr5	24011860	24214131	SIB predicted genes	HTR024395.5.416(+)
ASYNC_2219\17\0.425	chr5	24011860	24214131	SIB predicted genes	HTR024395.5.416(+)
ASYNC_2233\16\0.4	chr5	25254838	25334478	SIB predicted genes	HTR061273.5.427(-)
ASYNC_2234\15\0.187	chr5	25254838	25334478	SIB predicted genes	HTR061273.5.427(-)
ASYNC_2235\15\0.375	chr5	25254838	25334478	SIB predicted genes	HTR061273.5.427(-)
ASYNC_2237\15\0.375	chr5	25440598	25481791	SIB predicted genes	HTR055987.5.430(-)
ASYNC_2238\14\0.175	chr5	25440598	25481791	SIB predicted genes	HTR055987.5.430(-)
ASYNC_2239\14\0.35	chr5	25440598	25481791	SIB predicted genes	HTR055987.5.430(-)
ASYNC_2248\14\0.175	chr5	26418384	26435685	SIB predicted genes	HTR049138.5.431(-)
ASYNC_2271\15\0.25	chr5	27448476	27472275	SIB predicted genes	HTR066694.5.434(-)
ASYNC_2272\19\0.475	chr5	27448476	27472275	SIB predicted genes	HTR066694.5.434(-)
ASYNC_2293\18\0.45	chr5	28723711	28745838	SIB predicted genes	HTR045640.5.440(-)
ASYNC_2296\16\0.4	chr5	29066844	29072796	SIB predicted genes	HTR036324.5.443(-)
ASYNC_2300\15\0.25	chr5	29179366	29208222	SIB predicted genes	HTR022125.5.445(+)
ASYNC_2302\15\0.375	chr5	29227562	29252475	SIB predicted genes	HTR042023.5.446(+)
ASYNC_2306\14\0.35	chr5	29340416	29505511	SIB predicted genes	HTR031507.5.447(-)
ASYNC_2307\14\0.35	chr5	29340416	29505511	SIB predicted genes	HTR031507.5.447(-)
ASYNC_2308\17\0.425	chr5	29340416	29505511	SIB predicted genes	HTR031507.5.447(-)
ASYNC_2309\17\0.425	chr5	29340416	29505511	SIB predicted genes	HTR031507.5.447(-)
ASYNC_2310\14\0.233	chr5	29340416	29505511	SIB predicted genes	HTR031507.5.447(-)
ASYNC_2337\19\0.475	chr5	31675273	32146981	SIB predicted genes	HTR006538.5.462(+)
ASYNC_2360\16\0.4	chr5	32961501	33059190	SIB predicted genes	HTR042029.5.479(-)
ASYNC_2361\14\0.35	chr5	32961501	33059190	SIB predicted genes	HTR042029.5.479(-)
ASYNC_2399\15\0.375	chr5	36701318	36761054	SIB predicted genes	HTR031255.5.527(-)
ASYNC_2411\14\0.35	chr5	37113490	37115801	SIB predicted genes	HTR024358.5.533(-)
ASYNC_2430\14\0.35	chr5	37975223	37983814	SIB predicted genes	HTR042053.5.553(-)
ASYNC_2444\14\0.35	chr5	38592627	38707075	SIB predicted genes	HTR018431.5.564(+)
ASYNC_2445\19\0.475	chr5	38592627	38707075	SIB predicted genes	HTR018431.5.564(+)
ASYNC_2446\14\0.175	chr5	38592627	38707075	SIB predicted genes	HTR018431.5.564(+)
ASYNC_2447\14\0.35	chr5	38717738	38720985	SIB predicted genes	HTR064921.5.566(+)
ASYNC_2448\14\0.14	chr5	38729071	38882696	SIB predicted genes	HTR042056.5.569(-)
ASYNC_2449\14\0.35	chr5	38729071	38882696	SIB predicted genes	HTR042056.5.569(-)
ASYNC_2462\14\0.35	chr5	39141110	39310331	SIB predicted genes	HTR004198.5.577(-)
ASYNC_2467\15\0.375	chr5	39320005	39498159	SIB predicted genes	HTR009206.5.578(-)
ASYNC_2471\14\0.35	chr5	39556294	39560567	SIB predicted genes	HTR033039.5.580(+)
ASYNC_2499\14\0.35	chr5	40945280	41051870	SIB predicted genes	HTR008197.5.594(+)
ASYNC_2500\26\0.65	chr5	41118764	41197275	SIB predicted genes	HTR042137.5.597(+)
ASYNC_2507\18\0.15	chr5	41711772	41906860	SIB predicted genes	HTR010387.5.601(-)
ASYNC_2515\18\0.3	chr5	42191407	42211204	SIB predicted genes	HTR021443.5.606(-)
ASYNC_2520\26\0.65	chr5	43018221	43051001	SIB predicted genes	HTR018011.5.620(-)
ASYNC_2521\15\0.375	chr5	43018221	43051001	SIB predicted genes	HTR018011.5.620(-)
ASYNC_2522\24\0.6	chr5	43018221	43051001	SIB predicted genes	HTR018011.5.620(-)
ASYNC_2523\17\0.121	chr5	43050265	43103298	SIB predicted genes	HTR016592.5.624(-)
ASYNC_2524\14\0.233	chr5	43050265	43103298	SIB predicted genes	HTR016592.5.624(-)
ASYNC_2527\28\0.7	chr5	43050265	43103298	SIB predicted genes	HTR016592.5.624(-)
ASYNC_2528\86\2.15	chr5	43050265	43103298	SIB predicted genes	HTR016592.5.624(-)
ASYNC_2542\16\0.4	chr5	43607423	43639089	SIB predicted genes	HTR015089.5.643(-)
ASYNC_2550\17\0.283	chr5	44424590	44449848	SIB predicted genes	HTR026173.5.649(+)
ASYNC_2558\14\0.35	chr5	44780186	44844638	SIB predicted genes	HTR031252.5.654(-)
ASYNC_2559\16\0.4	chr5	44780186	44844638	SIB predicted genes	HTR031252.5.654(-)
ASYNC_2591\15\0.375	chr5	65207975	65274494	SIB predicted genes	HTR059427.5.837(+)
ASYNC_2667\14\0.35	chr5	123856450	123899931	SIB predicted genes	HTR042081.5.1540(-)
ASYNC_2713\19\0.19	chr5	139432625	139468399	SIB predicted genes	HTR030623.5.1795(-)
ASYNC_2734\15\0.375	chr5	145063676	145195125	SIB predicted genes	HTR011322.5.1917(-)
ASYNC_2737\14\0.35	chr5	145666859	145736719	SIB predicted genes	HTR036376.5.1926(-)
ASYNC_2806\26\0.433	chr5	179038167	179040581	SIB predicted genes	HTR030298.5.2459(-)
ASYNC_2811\36\0.9	chr5	180207216	180233428	SIB predicted genes	HTR016974.5.2500(-)
ASYNC_2822\25\0.25	chr6	3009073	3060425	SIB predicted genes	HTR006869.6.67(+)
ASYNC_2824\14\0.35	chr6	3837936	3966448	SIB predicted genes	HTR060801.6.91(-)
ASYNC_2829\36\0.9	chr6	6831122	6836692	SIB predicted genes	HTR064942.6.140(+)
ASYNC_2835\74\1.85	chr6	9815975	10319827	SIB predicted genes	HTR001825.6.176(-)
ASYNC_2874\25\0.416	chr6	28166314	28213818	SIB predicted genes	HTR029818.6.502(-)
ASYNC_2876\48\0.4	chr6	28166314	28213818	SIB predicted genes	HTR029818.6.502(-)
ASYNC_2888\21\0.525	chr6	29060504	29064292	SIB predicted genes	HTR042460.6.537(+)
ASYNC_2889\25\0.625	chr6	29631366	29731652	SIB predicted genes	HTR000148.6.565(-)
ASYNC_2905\72\1.8	chr6	30641554	30798152	SIB predicted genes	HTR066849.6.628(+)
ASYNC_2913\15\0.375	chr6	31728165	31733966	SIB predicted genes	HTR001022.6.718(+)
ASYNC_2920\23\0.575	chr6	31910363	31993638	SIB predicted genes	HTR055386.6.713(+)
ASYNC_2923\92\2.3	chr6	31910363	31993638	SIB predicted genes	HTR055386.6.713(+)
ASYNC_2924\14\0.35	chr6	31910363	31993638	SIB predicted genes	HTR055386.6.713(+)
ASYNC_3000\62\1.55	chr6	44071437	44150367	SIB predicted genes	HTR024481.6.1072(-)
ASYNC_3058\17\0.283	chr6	99985540	100076325	SIB predicted genes	HTR026342.6.1538(-)
ASYNC_3093\14\0.35	chr6	114397557	114899562	SIB predicted genes	HTR020007.6.1715(+)
ASYNC_3134\60\1.5	chr6	157632649	157665279	SIB predicted genes	HTR006827.6.2213(-)
ASYNC_3152\24\0.6	chr7	230936	244549	SIB predicted genes	HTR018752.7.5(-)
ASYNC_3170\17\0.283	chr7	2727981	2876946	SIB predicted genes	HTR002326.7.86(-)
ASYNC_3171\39\0.15	chr7	4648019	4777969	SIB predicted genes	HTR061484.7.106(+)
ASYNC_3178\101\2.525	chr7	5533280	5790834	SIB predicted genes	HTR001751.7.133(-)
ASYNC_3184\14\0.175	chr7	6084899	6099242	SIB predicted genes	HTR064408.7.149(+)
ASYNC_3194\20\0.333	chr7	6621772	6666316	SIB predicted genes	HTR018033.7.165(+)
ASYNC_3196\22\0.55	chr7	6639278	6805521	SIB predicted genes	HTR004946.7.167(+)
ASYNC_3205\14\0.35	chr7	11199517	11328476	SIB predicted genes	HTR056156.7.211(+)
ASYNC_3209\14\0.175	chr7	17138559	17305488	SIB predicted genes	HTR061899.7.258(+)
ASYNC_3210\14\0.35	chr7	17138559	17305488	SIB predicted genes	HTR061899.7.258(+)
ASYNC_3214\14\0.233	chr7	18296334	19003518	SIB predicted genes	HTR000416.7.272(+)
ASYNC_3297\15\0.25	chr7	53415327	53454050	SIB predicted genes	HTR031553.7.783(-)
ASYNC_3306\17\0.425	chr7	64237975	64873232	SIB predicted genes	HTR029059.7.951(-)
ASYNC_3307\18\0.45	chr7	64237975	64873232	SIB predicted genes	HTR029059.7.951(-)
ASYNC_3310\18\0.45	chr7	65511564	65596521	SIB predicted genes	HTR031865.7.981(-)
ASYNC_3311\22\0.55	chr7	65647864	65694829	SIB predicted genes	HTR036584.7.977(-)
ASYNC_3312\24\0.6	chr7	65731302	65914099	SIB predicted genes	HTR012606.7.976(+)
ASYNC_3316\47\1.175	chr7	65912414	65947295	SIB predicted genes	HTR029061.7.978(-)
ASYNC_3404\33\0.33	chr7	100262377	100302570	SIB predicted genes	HTR002465.7.1518(+)
ASYNC_3410\26\0.185	chr7	100662092	100682346	SIB predicted genes	HTR001527.7.1548(-)
ASYNC_3413\67\1.675	chr7	101764326	101854134	SIB predicted genes	HTR000178.7.1568(+)
ASYNC_3414\16\0.4	chr7	101764326	101854134	SIB predicted genes	HTR000178.7.1568(+)
ASYNC_3426\28\0.7	chr7	104248250	104529157	SIB predicted genes	HTR061087.7.1627(+)
ASYNC_3430\77\1.925	chr7	105889727	106038145	SIB predicted genes	HTR060329.7.1652(-)
ASYNC_3573\16\0.16	chr8	28513904	28669035	SIB predicted genes	HTR003268.8.531(+)
ASYNC_3586\48\0.8	chr8	32905028	33025523	SIB predicted genes	HTR016528.8.584(+)
ASYNC_3590\15\0.25	chr8	37398079	37530859	SIB predicted genes	HTR036805.8.617(-)
ASYNC_3617\14\0.35	chr8	55801519	55966047	SIB predicted genes	HTR062147.8.834(+)
ASYNC_3679\14\0.35	chr8	101462384	101495863	SIB predicted genes	HTR030747.8.1325(-)
ASYNC_3689\16\0.4	chr8	103886920	103892560	SIB predicted genes	HTR034422.8.1370(+)
ASYNC_3691\18\0.3	chr8	103945703	104059280	SIB predicted genes	HTR029749.8.1372(+)
ASYNC_3703\14\0.35	chr8	115392870	115402515	SIB predicted genes	HTR034394.8.1457(+)
ASYNC_3717\16\0.4	chr8	123036021	123208604	SIB predicted genes	HTR044844.8.1537(-)
ASYNC_3727\32\0.8	chr8	124498145	124548651	SIB predicted genes	HTR010672.8.1558(+)
ASYNC_3741\14\0.14	chr8	127848224	127872064	SIB predicted genes	HTR036760.8.1616(-)
ASYNC_3748\28\0.466	chr8	131133531	131525281	SIB predicted genes	HTR008285.8.1642(-)
ASYNC_3749\14\0.35	chr8	132120698	132171014	SIB predicted genes	HTR034428.8.1656(+)
ASYNC_3770\18\0.45	chr8	143780554	143805393	SIB predicted genes	HTR056703.8.1770(-)
ASYNC_3774\16\0.266	chr8	143912664	143994924	SIB predicted genes	HTR013641.8.1781(+)
ASYNC_3807\64\1.6	chr8	145725370	145896714	SIB predicted genes	HTR060284.8.1893(-)
ASYNC_3854\63\0.787	chr9	37068809	37069773	SIB predicted genes	HTR024649.9.487(+)
ASYNC_3866\15\0.375	chr9	67890997	67899695	SIB predicted genes	HTR016881.9.747(-)
ASYNC_3867\18\0.15	chr9	67902797	67908420	SIB predicted genes	HTR067202.9.749(-)
ASYNC_3869\14\0.233	chr9	67915886	67945215	SIB predicted genes	HTR021305.9.750(-)
ASYNC_3870\16\0.4	chr9	68077773	68116251	SIB predicted genes	HTR045699.9.753(-)
ASYNC_3905\19\0.105	chr9	95968391	96002976	SIB predicted genes	HTR061004.9.1173(+)
ASYNC_3956\19\0.475	chr9	116653068	116923130	SIB predicted genes	HTR048063.9.1494(+)
ASYNC_3999\79\1.975	chr9	129026364	129195760	SIB predicted genes	HTR007444.9.1686(+)
ASYNC_4041\16\0.4	chr9	130978547	131012683	SIB predicted genes	HTR049503.9.1779(+)
ASYNC_4042\271\6.775	chr9	130978547	131012683	SIB predicted genes	HTR049503.9.1779(+)
ASYNC_4046\18\0.128	chr9	131232751	131249390	SIB predicted genes	HTR043654.9.1790(-)
ASYNC_4047\141\3.525	chr9	131377508	131386656	SIB predicted genes	HTR063934.9.1788(+)
ASYNC_4058\18\0.3	chr9	132213751	132284790	SIB predicted genes	HTR017433.9.1818(+)
ASYNC_4118\36\0.9	chr9	139124812	139143992	SIB predicted genes	HTR044148.9.2040(-)
ASYNC_4125\42\0.7	chr9	139308140	139309994	SIB predicted genes	HTR050169.9.2064(-)
ASYNC_4131\14\0.35	chr10	844103	967840	SIB predicted genes	HTR015923.10.19(-)
ASYNC_4163\14\0.35	chr10	42335408	42408993	SIB predicted genes	HTR052311.10.612(-)
ASYNC_4175\15\0.15	chr10	46431530	46601668	SIB predicted genes	HTR031301.10.703(-)
ASYNC_4176\14\0.233	chr10	46431530	46601668	SIB predicted genes	HTR031301.10.703(-)
ASYNC_4177\15\0.25	chr10	46431530	46601668	SIB predicted genes	HTR031301.10.703(-)
ASYNC_4178\15\0.375	chr10	46431530	46601668	SIB predicted genes	HTR031301.10.703(-)
ASYNC_4179\15\0.375	chr10	46431530	46601668	SIB predicted genes	HTR031301.10.703(-)
ASYNC_4186\16\0.266	chr10	61458071	62163282	SIB predicted genes	HTR006459.10.876(-)
ASYNC_4210\23\0.23	chr10	72803738	72808783	SIB predicted genes	HTR049003.10.1019(+)
ASYNC_4224\15\0.25	chr10	74866191	75165686	SIB predicted genes	HTR004975.10.1064(-)
ASYNC_4243\14\0.35	chr10	79668017	80104872	SIB predicted genes	HTR023333.10.1151(+)
ASYNC_4265\52\1.3	chr10	95495493	95507470	SIB predicted genes	HTR064583.10.1384(-)
ASYNC_4270\23\0.575	chr10	97502952	97839986	SIB predicted genes	HTR031939.10.1411(-)
ASYNC_4271\30\0.75	chr10	97502952	97839986	SIB predicted genes	HTR031939.10.1411(-)
ASYNC_4295\20\0.333	chr10	102981998	103019895	SIB predicted genes	HTR020326.10.1534(+)
ASYNC_4348\27\0.27	chr10	122473313	123347738	SIB predicted genes	HTR024779.10.1819(-)
ASYNC_4362\19\0.475	chr10	126594708	126596219	SIB predicted genes	HTR063246.10.1890(-)
ASYNC_4367\16\0.114	chr10	131751532	131799071	SIB predicted genes	HTR018440.10.1959(-)
ASYNC_4368\35\0.875	chr10	131751532	131799071	SIB predicted genes	HTR018440.10.1959(-)
ASYNC_4427\14\0.35	chr11	27040696	27198236	SIB predicted genes	HTR030769.11.588(-)
ASYNC_4433\14\0.35	chr11	30751984	30826656	SIB predicted genes	HTR065173.11.638(+)
ASYNC_4440\15\0.375	chr11	33454390	33652224	SIB predicted genes	HTR011473.11.674(+)
ASYNC_4453\174\4.35	chr11	43534561	43836383	SIB predicted genes	HTR021633.11.760(+)
ASYNC_4456\15\0.375	chr11	45333497	45344284	SIB predicted genes	HTR045210.11.791(+)
ASYNC_4514\14\0.35	chr11	59466934	59555126	SIB predicted genes	HTR037551.11.1043(+)
ASYNC_4528\15\0.375	chr11	61957589	62080295	SIB predicted genes	HTR008985.11.1127(-)
ASYNC_4712\14\0.233	chr11	76903628	77026499	SIB predicted genes	HTR004787.11.1656(-)
ASYNC_4713\14\0.233	chr11	76903628	77026499	SIB predicted genes	HTR004787.11.1656(-)
ASYNC_4720\16\0.4	chr11	77528464	77564230	SIB predicted genes	HTR031615.11.1673(+)
ASYNC_4759\15\0.25	chr11	118269310	118301372	SIB predicted genes	HTR013676.11.2176(-)
ASYNC_4760\34\0.85	chr11	118269310	118301372	SIB predicted genes	HTR013676.11.2176(-)
ASYNC_4798\14\0.233	chr12	4541636	4831354	SIB predicted genes	HTR011210.12.108(+)
ASYNC_4811\15\0.375	chr12	6852813	6893667	SIB predicted genes	HTR015678.12.172(+)
ASYNC_4839\20\0.2	chr12	28190281	28625711	SIB predicted genes	HTR006774.12.551(+)
ASYNC_4859\34\0.85	chr12	43187879	43631120	SIB predicted genes	HTR005157.12.684(-)
ASYNC_4864\14\0.35	chr12	45063728	45556399	SIB predicted genes	HTR023493.12.701(+)
ASYNC_4870\15\0.187	chr12	47030994	47122461	SIB predicted genes	HTR065288.12.750(+)
ASYNC_4893\14\0.35	chr12	48656973	48713186	SIB predicted genes	HTR048758.12.824(-)
ASYNC_4983\29\0.483	chr12	56611498	56622633	SIB predicted genes	HTR022420.12.1138(-)
ASYNC_5024\15\0.375	chr12	88800192	88981706	SIB predicted genes	HTR064347.12.1458(+)
ASYNC_5027\15\0.375	chr12	91921324	92295666	SIB predicted genes	HTR045242.12.1493(-)
ASYNC_5045\18\0.45	chr12	97403452	97421764	SIB predicted genes	HTR031624.12.1571(-)
ASYNC_5052\17\0.283	chr12	100486261	100603789	SIB predicted genes	HTR001858.12.1609(+)
ASYNC_5080\270\6.75	chr12	108633660	108636752	SIB predicted genes	HTR063287.12.1759(+)
ASYNC_5097\20\0.5	chr12	111242247	111419358	SIB predicted genes	HTR060233.12.1813(+)
ASYNC_5110\64\1.6	chr12	118147890	118181205	SIB predicted genes	HTR034849.12.1933(-)
ASYNC_5146\52\0.433	chr12	122339608	122415709	SIB predicted genes	HTR047156.12.2045(-)
ASYNC_5153\32\0.8	chr12	123123304	123167497	SIB predicted genes	HTR060899.12.2067(+)
ASYNC_5158\17\0.425	chr12	125144681	125154431	SIB predicted genes	HTR031991.12.2098(+)
ASYNC_5183\31\0.31	chr13	20732167	20865069	SIB predicted genes	HTR012927.13.74(+)
ASYNC_5202\16\0.266	chr13	32575272	33148972	SIB predicted genes	HTR006975.13.264(-)
ASYNC_5203\18\0.3	chr13	32575272	33148972	SIB predicted genes	HTR006975.13.264(-)
ASYNC_5241\14\0.35	chr13	77391824	78090292	SIB predicted genes	HTR034927.13.713(+)
ASYNC_5323\17\0.283	chr14	26137457	26270196	SIB predicted genes	HTR034992.14.254(+)
ASYNC_5329\38\0.38	chr14	30830744	30996467	SIB predicted genes	HTR014550.14.303(-)
ASYNC_5410\175\4.375	chr14	68719492	68750562	SIB predicted genes	HTR025054.14.797(-)
ASYNC_5464\31\0.775	chr14	89919620	89924005	SIB predicted genes	HTR063921.14.1107(+)
ASYNC_5485\20\0.5	chr14	96277280	96326704	SIB predicted genes	HTR033479.14.1236(+)
ASYNC_5490\15\0.375	chr14	99507511	99680656	SIB predicted genes	HTR003066.14.1274(+)
ASYNC_5511\105\2.625	chr14	104353545	104361100	SIB predicted genes	HTR010017.14.1404(+)
ASYNC_5512\14\0.233	chr14	104353545	104361100	SIB predicted genes	HTR010017.14.1404(+)
ASYNC_5522\17\0.425	chr14	105120692	106352297	SIB predicted genes	HTR014166.14.1436(-)
ASYNC_5523\14\0.233	chr15	18847549	18971462	SIB predicted genes	HTR035082.15.21(-)
ASYNC_5524\14\0.233	chr15	19109753	19221520	SIB predicted genes	HTR057770.15.32(-)
ASYNC_5525\14\0.233	chr15	19363175	19363943	SIB predicted genes	HTR063331.15.41(-)
ASYNC_5527\17\0.425	chr15	19899946	19942229	SIB predicted genes	HTR054047.15.54(-)
ASYNC_5528\14\0.175	chr15	20047751	20072491	SIB predicted genes	HTR032610.15.62(+)
ASYNC_5569\24\0.6	chr15	39700713	39850045	SIB predicted genes	HTR014573.15.462(+)
ASYNC_5643\23\0.575	chr15	63341643	63534005	SIB predicted genes	HTR051326.15.886(-)
ASYNC_5695\16\0.4	chr15	73817215	73841796	SIB predicted genes	HTR025165.15.1126(+)
ASYNC_5715\33\0.825	chr15	81125087	81223804	SIB predicted genes	HTR062962.15.1294(-)
ASYNC_5746\24\0.4	chr15	91077817	91154118	SIB predicted genes	HTR033533.15.1504(-)
ASYNC_5748\18\0.3	chr15	91192620	91372240	SIB predicted genes	HTR003664.15.1501(+)
ASYNC_5751\21\0.525	chr15	94698469	94747968	SIB predicted genes	HTR038532.15.1541(+)
ASYNC_5824\22\0.366	chr16	2606122	2672394	SIB predicted genes	HTR025235.16.178(-)
ASYNC_5835\14\0.35	chr16	3055313	3121519	SIB predicted genes	HTR008006.16.228(+)
ASYNC_5836\45\1.125	chr16	3055313	3121519	SIB predicted genes	HTR008006.16.228(+)
ASYNC_5842\21\0.35	chr16	3253743	3257568	SIB predicted genes	HTR053358.16.239(+)
ASYNC_5843\36\0.257	chr16	3253743	3257568	SIB predicted genes	HTR053358.16.239(+)
ASYNC_5881\35\0.583	chr16	10327791	10485001	SIB predicted genes	HTR011495.16.360(+)
ASYNC_5912\21\0.525	chr16	19032754	19187157	SIB predicted genes	HTR009117.16.531(+)
ASYNC_5928\29\0.725	chr16	21917763	21926884	SIB predicted genes	HTR063191.16.605(+)
ASYNC_5947\57\0.237	chr16	24950562	24986257	SIB predicted genes	HTR023708.16.671(+)
ASYNC_5969\32\0.8	chr16	29462894	30118235	SIB predicted genes	HTR001711.16.775(-)
ASYNC_5971\33\0.33	chr16	29462894	30118235	SIB predicted genes	HTR001711.16.775(-)
ASYNC_6013\64\1.6	chr16	30752447	30824853	SIB predicted genes	HTR010847.16.850(-)
ASYNC_6067\15\0.25	chr16	53851380	53925001	SIB predicted genes	HTR038732.16.1164(-)
ASYNC_6085\66\1.65	chr16	56749307	57159744	SIB predicted genes	HTR060065.16.1242(-)
ASYNC_6099\14\0.35	chr16	65394278	65464657	SIB predicted genes	HTR003899.16.1302(-)
ASYNC_6177\15\0.375	chr16	70882643	71256409	SIB predicted genes	HTR030796.16.1486(-)
ASYNC_6211\154\3.85	chr16	80330179	80549545	SIB predicted genes	HTR003366.16.1640(+)
ASYNC_6220\16\0.4	chr16	83733798	83760115	SIB predicted genes	HTR057884.16.1703(-)
ASYNC_6227\37\0.616	chr16	85893661	85983245	SIB predicted genes	HTR059570.16.1745(-)
ASYNC_6295\14\0.35	chr17	4719384	5061423	SIB predicted genes	HTR051201.17.180(-)
ASYNC_6373\37\0.616	chr17	17435469	17454524	SIB predicted genes	HTR059015.17.512(+)
ASYNC_6384\50\1.25	chr17	18542035	18580157	SIB predicted genes	HTR061609.17.561(+)
ASYNC_6389\203\5.075	chr17	19851959	19853139	SIB predicted genes	HTR063939.17.613(+)
ASYNC_6396\91\1.516	chr17	21131759	21186045	SIB predicted genes	HTR063386.17.649(+)
ASYNC_6399\48\1.2	chr17	23560022	23579015	SIB predicted genes	HTR039111.17.690(-)
ASYNC_6434\19\0.135	chr17	30919239	30925515	SIB predicted genes	HTR029810.17.912(+)
ASYNC_6445\15\0.375	chr17	33541107	33675352	SIB predicted genes	HTR025320.17.977(-)
ASYNC_6446\17\0.212	chr17	33541107	33675352	SIB predicted genes	HTR025320.17.977(-)
ASYNC_6447\14\0.35	chr17	33541107	33675352	SIB predicted genes	HTR025320.17.977(-)
ASYNC_6468\17\0.283	chr17	35514146	35581961	SIB predicted genes	HTR007950.17.1054(+)
ASYNC_6476\14\0.35	chr17	37080814	37102150	SIB predicted genes	HTR055087.17.1147(+)
ASYNC_6505\16\0.4	chr17	38724486	38822017	SIB predicted genes	HTR018524.17.1293(-)
ASYNC_6506\19\0.475	chr17	38724486	38822017	SIB predicted genes	HTR018524.17.1293(-)
ASYNC_6528\21\0.525	chr17	41462770	41658517	SIB predicted genes	HTR014695.17.1361(-)
ASYNC_6529\14\0.35	chr17	41462770	41658517	SIB predicted genes	HTR014695.17.1361(-)
ASYNC_6530\227\5.675	chr17	41462770	41658517	SIB predicted genes	HTR014695.17.1361(-)
ASYNC_6531\15\0.15	chr17	41462770	41658517	SIB predicted genes	HTR014695.17.1361(-)
ASYNC_6533\32\0.8	chr17	42416409	42532626	SIB predicted genes	HTR033612.17.1388(-)
ASYNC_6590\20\0.5	chr17	55558265	55567891	SIB predicted genes	HTR059602.17.1688(-)
ASYNC_6618\37\0.925	chr17	63462096	63474264	SIB predicted genes	HTR061466.17.1840(+)
ASYNC_6624\42\0.262	chr17	67892037	68101810	SIB predicted genes	HTR025318.17.1905(-)
ASYNC_6660\175\4.375	chr17	72035025	72065360	SIB predicted genes	HTR007047.17.2040(-)
ASYNC_6667\18\0.45	chr17	73424749	73456665	SIB predicted genes	HTR065751.17.2104(-)
ASYNC_6670\276\6.9	chr17	73681755	73887830	SIB predicted genes	HTR007966.17.2095(-)
ASYNC_6672\56\1.4	chr17	73791423	74135337	SIB predicted genes	HTR045036.17.2098(-)
ASYNC_6680\44\1.1	chr17	76041593	76044569	SIB predicted genes	HTR019166.17.2174(-)
ASYNC_6712\14\0.35	chr18	1499035	1637168	SIB predicted genes	HTR033687.18.32(+)
ASYNC_6717\24\0.4	chr18	3274142	3320680	SIB predicted genes	HTR025382.18.56(+)
ASYNC_6767\98\2.45	chr18	53448531	53556883	SIB predicted genes	HTR020429.18.637(+)
ASYNC_6826\30\0.5	chr19	2900032	2901642	SIB predicted genes	HTR057684.19.142(-)
ASYNC_6880\46\1.15	chr19	6354131	6702495	SIB predicted genes	HTR062907.19.286(+)
ASYNC_6906\16\0.4	chr19	8781251	8804004	SIB predicted genes	HTR012453.19.369(-)
ASYNC_6950\14\0.35	chr19	12733871	12765129	SIB predicted genes	HTR010581.19.530(-)
ASYNC_6964\35\0.875	chr19	13490551	13604839	SIB predicted genes	HTR030812.19.560(-)
ASYNC_6975\90\2.25	chr19	14052951	14057640	SIB predicted genes	HTR061120.19.579(-)
ASYNC_6976\167\4.175	chr19	14052951	14057640	SIB predicted genes	HTR061120.19.579(-)
ASYNC_6977\19\0.475	chr19	14052951	14057640	SIB predicted genes	HTR061120.19.579(-)
ASYNC_7033\17\0.283	chr19	17983115	18003348	SIB predicted genes	HTR035436.19.733(-)
ASYNC_7034\20\0.5	chr19	17983115	18003348	SIB predicted genes	HTR035436.19.733(-)
ASYNC_7054\44\1.1	chr19	19748369	19806736	SIB predicted genes	HTR031176.19.812(+)
ASYNC_7055\14\0.35	chr19	20407197	20503265	SIB predicted genes	HTR039340.19.827(+)
ASYNC_7106\125\3.125	chr19	41517194	41561945	SIB predicted genes	HTR058369.19.1133(-)
ASYNC_7116\65\1.625	chr19	42275760	42400895	SIB predicted genes	HTR039481.19.1162(-)
ASYNC_7117\112\2.8	chr19	42275760	42400895	SIB predicted genes	HTR039481.19.1162(-)
ASYNC_7118\15\0.25	chr19	42367561	42542376	SIB predicted genes	HTR000642.19.1165(-)
ASYNC_7146\23\0.575	chr19	45230497	45288685	SIB predicted genes	HTR059518.19.1279(-)
ASYNC_7176\82\2.05	chr19	49108100	49131270	SIB predicted genes	HTR007593.19.1417(-)
ASYNC_7188\18\0.112	chr19	49403539	49433264	SIB predicted genes	HTR016389.19.1433(+)
ASYNC_7222\47\0.783	chr19	51675884	51796297	SIB predicted genes	HTR025416.19.1538(-)
ASYNC_7235\23\0.575	chr19	53398216	53450984	SIB predicted genes	HTR002819.19.1600(-)
ASYNC_7236\58\1.45	chr19	53398216	53450984	SIB predicted genes	HTR002819.19.1600(-)
ASYNC_7327\14\0.35	chr19	55844513	55854966	SIB predicted genes	HTR030337.19.1744(+)
ASYNC_7328\35\0.875	chr19	55844513	55854966	SIB predicted genes	HTR030337.19.1744(+)
ASYNC_7335\15\0.375	chr19	56589553	56598716	SIB predicted genes	HTR065876.19.1797(+)
ASYNC_7383\69\1.725	chr19	60838172	60856339	SIB predicted genes	HTR000677.19.1997(+)
ASYNC_7392\19\0.316	chr19	61392869	61571564	SIB predicted genes	HTR011030.19.2015(-)
ASYNC_7393\69\1.725	chr19	61392869	61571564	SIB predicted genes	HTR011030.19.2015(-)
ASYNC_7394\61\1.525	chr19	61392869	61571564	SIB predicted genes	HTR011030.19.2015(-)
ASYNC_7422\232\5.8	chr19	63481701	63518835	SIB predicted genes	HTR003334.19.2100(+)
ASYNC_7506\17\0.141	chr20	28225488	28267569	SIB predicted genes	HTR012353.20.443(+)
ASYNC_7507\15\0.375	chr20	28225488	28267569	SIB predicted genes	HTR012353.20.443(+)
ASYNC_7585\58\1.45	chr20	39754588	39755609	SIB predicted genes	HTR045579.20.707(-)
ASYNC_7591\144\3.6	chr20	41719614	41778549	SIB predicted genes	HTR010121.20.723(+)
ASYNC_7599\73\1.825	chr20	42681571	42808595	SIB predicted genes	HTR004186.20.733(-)
ASYNC_7600\17\0.17	chr20	42681571	42808595	SIB predicted genes	HTR004186.20.733(-)
ASYNC_7601\85\2.125	chr20	42681571	42808595	SIB predicted genes	HTR004186.20.733(-)
ASYNC_7609\15\0.25	chr20	43809989	43853973	SIB predicted genes	HTR015776.20.784(-)
ASYNC_7628\33\0.825	chr20	45335406	45521455	SIB predicted genes	HTR046982.20.833(+)
ASYNC_7665\14\0.233	chr20	50580833	50701082	SIB predicted genes	HTR040324.20.935(+)
ASYNC_7679\14\0.35	chr20	57585958	57856161	SIB predicted genes	HTR005700.20.1042(+)
ASYNC_7692\18\0.18	chr20	61689390	61729531	SIB predicted genes	HTR005447.20.1153(-)
ASYNC_7693\23\0.104	chr20	61689390	61729531	SIB predicted genes	HTR005447.20.1153(-)
ASYNC_7694\49\1.225	chr20	61729023	61730620	SIB predicted genes	HTR030240.20.1154(+)
ASYNC_7743\41\0.41	chr21	34225312	34265357	SIB predicted genes	HTR050081.21.329(+)
ASYNC_7772\17\0.425	chr21	45550314	45563276	SIB predicted genes	HTR066173.21.667(-)
ASYNC_7782\17\0.425	chr22	17232555	17264242	SIB predicted genes	HTR059975.22.86(-)
ASYNC_7805\14\0.35	chr22	22566604	22728238	SIB predicted genes	HTR020175.22.326(-)
ASYNC_7814\45\0.75	chr22	28163003	28204115	SIB predicted genes	HTR016651.22.467(-)
ASYNC_7827\25\0.208	chr22	30343288	30388547	SIB predicted genes	HTR007118.22.532(-)
ASYNC_7840\15\0.25	chr22	35429866	35493079	SIB predicted genes	HTR035794.22.662(+)
ASYNC_7889\30\0.75	chrX	3608205	3804767	SIB predicted genes	HTR051976.X.59(-)
ASYNC_7909\18\0.3	chrX	17148431	17207901	SIB predicted genes	HTR067281.X.174(+)
ASYNC_7962\38\0.633	chrX	48442391	48485345	SIB predicted genes	HTR033231.X.472(-)
ASYNC_7978\27\0.675	chrX	52936113	52994838	SIB predicted genes	HTR003308.X.584(+)
ASYNC_7979\15\0.375	chrX	52936113	52994838	SIB predicted genes	HTR003308.X.584(+)
ASYNC_7980\19\0.135	chrX	52936113	52994838	SIB predicted genes	HTR003308.X.584(+)
ASYNC_7981\46\1.15	chrX	52952660	53041376	SIB predicted genes	HTR003308.X.585(-)
ASYNC_8061\101\2.525	chrX	138841840	138842895	SIB predicted genes	HTR055983.X.1353(-)
ASYNC_175\17\0.425	chr1	28847974	28848124	Alus repeats	AluJo_SINE_Alu
ASYNC_314\14\0.14	chr1	65242207	65242511	Alus repeats	AluSx_SINE_Alu
ASYNC_656\14\0.35	chr1	160771680	160771798	Alus repeats	FLAM_C_SINE_Alu
ASYNC_744\14\0.35	chr1	184885302	184885611	Alus repeats	AluSq_SINE_Alu
ASYNC_746\14\0.35	chr1	187150416	187150715	Alus repeats	AluSg_SINE_Alu
ASYNC_756\15\0.375	chr1	193505030	193505323	Alus repeats	AluJb_SINE_Alu
ASYNC_762\14\0.35	chr1	198256864	198257161	Alus repeats	AluSx_SINE_Alu
ASYNC_780\14\0.35	chr1	201846529	201846827	Alus repeats	AluJo_SINE_Alu
ASYNC_1193\20\0.125	chr2	132746404	132746696	Alus repeats	AluSx_SINE_Alu
ASYNC_1194\16\0.266	chr2	132747691	132748259	Alus repeats	AluJo_SINE_Alu
ASYNC_1377\14\0.35	chr3	39355657	39355956	Alus repeats	AluJb_SINE_Alu
ASYNC_1610\15\0.25	chr3	151726155	151726415	Alus repeats	AluJb_SINE_Alu
ASYNC_1650\14\0.175	chr3	163991133	163991445	Alus repeats	AluSx_SINE_Alu
ASYNC_1669\14\0.35	chr3	173036097	173036220	Alus repeats	FLAM_C_SINE_Alu
ASYNC_1973\14\0.35	chr5	6634457	6634622	Alus repeats	FRAM_SINE_Alu
ASYNC_2036\15\0.25	chr5	11013427	11013576	Alus repeats	FAM_SINE_Alu
ASYNC_2092\14\0.35	chr5	15239368	15239692	Alus repeats	AluSx_SINE_Alu
ASYNC_2129\20\0.5	chr5	17810059	17810367	Alus repeats	AluJb_SINE_Alu
ASYNC_2143\14\0.35	chr5	18506885	18507181	Alus repeats	AluSx_SINE_Alu
ASYNC_2162\16\0.266	chr5	20136822	20137127	Alus repeats	AluJo_SINE_Alu
ASYNC_2166\14\0.35	chr5	20287971	20288243	Alus repeats	AluSc_SINE_Alu
ASYNC_2168\14\0.35	chr5	20460951	20461253	Alus repeats	AluSg_SINE_Alu
ASYNC_2207\16\0.266	chr5	23803843	23804163	Alus repeats	AluSx_SINE_Alu
ASYNC_2213\18\0.45	chr5	23898247	23898537	Alus repeats	AluJb_SINE_Alu
ASYNC_2240\14\0.116	chr5	25564171	25564459	Alus repeats	AluJb_SINE_Alu
ASYNC_2242\19\0.475	chr5	25751554	25751858	Alus repeats	AluSx_SINE_Alu
ASYNC_2243\14\0.35	chr5	25768322	25768626	Alus repeats	AluSx_SINE_Alu
ASYNC_2252\15\0.375	chr5	26542792	26543092	Alus repeats	AluSx_SINE_Alu
ASYNC_2256\18\0.225	chr5	26749838	26750006	Alus repeats	AluJb_SINE_Alu
ASYNC_2287\15\0.375	chr5	28230223	28230515	Alus repeats	AluSx_SINE_Alu
ASYNC_2304\18\0.45	chr5	29271230	29271525	Alus repeats	AluSg_SINE_Alu
ASYNC_2373\14\0.35	chr5	34612402	34612688	Alus repeats	AluSq_SINE_Alu
ASYNC_2379\14\0.35	chr5	35000099	35000405	Alus repeats	AluJo_SINE_Alu
ASYNC_2489\14\0.14	chr5	40595763	40596047	Alus repeats	AluJb_SINE_Alu
ASYNC_2519\14\0.35	chr5	42977055	42977378	Alus repeats	AluJb_SINE_Alu
ASYNC_2852\21\0.525	chr6	19879160	19879356	Alus repeats	AluJ_SINE_Alu
ASYNC_2868\14\0.35	chr6	27143824	27144150	Alus repeats	AluJo_SINE_Alu
ASYNC_2886\20\0.333	chr6	28976449	28976598	Alus repeats	FRAM_SINE_Alu
ASYNC_3157\15\0.375	chr7	1151296	1151589	Alus repeats	AluJb_SINE_Alu
ASYNC_3225\14\0.233	chr7	23500857	23501152	Alus repeats	AluJb_SINE_Alu
ASYNC_3258\17\0.283	chr7	37466897	37467214	Alus repeats	AluJb_SINE_Alu
ASYNC_3351\15\0.375	chr7	84306098	84306413	Alus repeats	AluJb_SINE_Alu
ASYNC_4161\17\0.085	chr10	42019596	42019903	Alus repeats	AluY_SINE_Alu
ASYNC_4240\14\0.35	chr10	79126456	79126745	Alus repeats	AluSx_SINE_Alu
ASYNC_4495\14\0.35	chr11	47940721	47940846	Alus repeats	FLAM_A_SINE_Alu
ASYNC_4702\16\0.4	chr11	74643983	74644274	Alus repeats	AluJo_SINE_Alu
ASYNC_5038\18\0.45	chr12	94291443	94291746	Alus repeats	AluSx_SINE_Alu
ASYNC_5237\14\0.35	chr13	64627904	64628210	Alus repeats	AluJb_SINE_Alu
ASYNC_5761\16\0.4	chr15	99057720	99058022	Alus repeats	AluJb_SINE_Alu
ASYNC_6096\14\0.35	chr16	63853861	63854178	Alus repeats	AluJb_SINE_Alu
ASYNC_6200\15\0.25	chr16	78622519	78622804	Alus repeats	AluJb_SINE_Alu
ASYNC_6996\15\0.375	chr19	15942038	15942326	Alus repeats	AluJb_SINE_Alu
ASYNC_7756\17\0.425	chr21	38967561	38967891	Alus repeats	AluY_SINE_Alu
ASYNC_805\14\0.35	chr1	206578323	206578504	MIR repeats	MIRb_SINE_MIR
ASYNC_2146\14\0.175	chr5	18862285	18862512	MIR repeats	MIRb_SINE_MIR
ASYNC_2358\15\0.25	chr5	32875495	32875683	MIR repeats	MIR_SINE_MIR
ASYNC_2427\14\0.35	chr5	37823218	37823278	MIR repeats	MIRb_SINE_MIR
ASYNC_2468\16\0.4	chr5	39498937	39499158	MIR repeats	MIRb_SINE_MIR
ASYNC_2555\14\0.35	chr5	44687376	44687562	MIR repeats	MIRb_SINE_MIR
ASYNC_3739\16\0.4	chr8	127530253	127530385	MIR repeats	MIR_SINE_MIR
ASYNC_4436\14\0.233	chr11	32172683	32172717	MIR repeats	MIR_SINE_MIR
ASYNC_288\14\0.233	chr1	50605321	50606213	L1 repeats	HAL1_LINE_L1
ASYNC_747\16\0.4	chr1	188152229	188152324	L1 repeats	L1PA17_LINE_L1
ASYNC_751\14\0.35	chr1	190978655	190979017	L1 repeats	L1MEb_LINE_L1
ASYNC_822\15\0.25	chr1	212318410	212319018	L1 repeats	L1MC4_LINE_L1
ASYNC_1634\14\0.233	chr3	158935162	158937580	L1 repeats	L1M3f_LINE_L1
ASYNC_1652\14\0.35	chr3	167140498	167141796	L1 repeats	L1MB7_LINE_L1
ASYNC_1919\14\0.35	chr5	1587989	1589988	L1 repeats	L1ME1_LINE_L1
ASYNC_1937\14\0.35	chr5	3302605	3303463	L1 repeats	L1MC1_LINE_L1
ASYNC_1939\14\0.233	chr5	3431943	3432324	L1 repeats	L1MD1_LINE_L1
ASYNC_1947\15\0.25	chr5	4675924	4678103	L1 repeats	L1M4c_LINE_L1
ASYNC_1988\15\0.375	chr5	7408566	7409502	L1 repeats	L1MC1_LINE_L1
ASYNC_1998\17\0.283	chr5	8334957	8335396	L1 repeats	L1PB2_LINE_L1
ASYNC_2054\14\0.35	chr5	13381527	13381693	L1 repeats	L1MEa_LINE_L1
ASYNC_2056\18\0.3	chr5	13434400	13437623	L1 repeats	L1P4c_LINE_L1
ASYNC_2089\14\0.35	chr5	14988821	14990194	L1 repeats	L1MB5_LINE_L1
ASYNC_2090\17\0.425	chr5	15103505	15110959	L1 repeats	L1MA5_LINE_L1
ASYNC_2140\18\0.45	chr5	18228555	18228726	L1 repeats	L1M3b_LINE_L1
ASYNC_2147\16\0.266	chr5	18925658	18928188	L1 repeats	L1PA8A_LINE_L1
ASYNC_2148\15\0.375	chr5	19080242	19081760	L1 repeats	L1PBa_LINE_L1
ASYNC_2154\15\0.375	chr5	19227012	19228357	L1 repeats	L1M3de_LINE_L1
ASYNC_2163\17\0.283	chr5	20205884	20206284	L1 repeats	L1PA10_LINE_L1
ASYNC_2170\14\0.35	chr5	20622176	20622548	L1 repeats	L1PA8_LINE_L1
ASYNC_2206\16\0.4	chr5	23691235	23693505	L1 repeats	L1MA4_LINE_L1
ASYNC_2209\14\0.116	chr5	23830965	23831337	L1 repeats	L1MCa_LINE_L1
ASYNC_2220\15\0.375	chr5	24249709	24250906	L1 repeats	L1MC1_LINE_L1
ASYNC_2241\17\0.425	chr5	25618081	25622527	L1 repeats	L1PB2_LINE_L1
ASYNC_2267\14\0.35	chr5	27374770	27377803	L1 repeats	L1P5_LINE_L1
ASYNC_2273\14\0.233	chr5	27482780	27484779	L1 repeats	L1M2_LINE_L1
ASYNC_2281\15\0.187	chr5	27906661	27909260	L1 repeats	L1PA10_LINE_L1
ASYNC_2283\14\0.175	chr5	28101834	28104759	L1 repeats	L1PA13_LINE_L1
ASYNC_2284\15\0.25	chr5	28101834	28104759	L1 repeats	L1PA13_LINE_L1
ASYNC_2286\19\0.475	chr5	28215482	28217863	L1 repeats	L1MA7_LINE_L1
ASYNC_2290\16\0.4	chr5	28580868	28581545	L1 repeats	L1PA13_LINE_L1
ASYNC_2311\14\0.35	chr5	29532581	29535545	L1 repeats	L1PA13_LINE_L1
ASYNC_2314\16\0.4	chr5	29772937	29777504	L1 repeats	L1PA15_LINE_L1
ASYNC_2318\16\0.4	chr5	30164621	30169076	L1 repeats	L1MA7_LINE_L1
ASYNC_2321\14\0.35	chr5	30325985	30327008	L1 repeats	L1MDa_LINE_L1
ASYNC_2330\14\0.35	chr5	31371019	31371150	L1 repeats	HAL1_LINE_L1
ASYNC_2382\17\0.425	chr5	35419909	35426566	L1 repeats	L1M5_LINE_L1
ASYNC_2474\17\0.283	chr5	39705981	39706421	L1 repeats	L1ME4a_LINE_L1
ASYNC_2504\14\0.175	chr5	41576178	41578377	L1 repeats	L1PA15-16_LINE_L1
ASYNC_2554\14\0.175	chr5	44640724	44641779	L1 repeats	L1PB1_LINE_L1
ASYNC_3061\14\0.233	chr6	102767372	102767782	L1 repeats	L1MC1_LINE_L1
ASYNC_3202\15\0.375	chr7	10130923	10131309	L1 repeats	L1P3_LINE_L1
ASYNC_3208\16\0.2	chr7	12982159	12982456	L1 repeats	L1MA8_LINE_L1
ASYNC_3232\14\0.35	chr7	25977609	25979078	L1 repeats	HAL1_LINE_L1
ASYNC_3298\16\0.4	chr7	54181870	54182158	L1 repeats	L1MA6_LINE_L1
ASYNC_3680\14\0.35	chr8	101527514	101530400	L1 repeats	L1MB4_LINE_L1
ASYNC_3701\14\0.233	chr8	111817947	111821952	L1 repeats	L1MD2_LINE_L1
ASYNC_3750\16\0.4	chr8	132528509	132529031	L1 repeats	L1MDa_LINE_L1
ASYNC_4426\18\0.45	chr11	25544126	25544605	L1 repeats	L1M2a_LINE_L1
ASYNC_4733\14\0.35	chr11	87208536	87208885	L1 repeats	L1MEd_LINE_L1
ASYNC_4775\17\0.425	chr11	127386602	127387878	L1 repeats	L1PA11_LINE_L1
ASYNC_4776\17\0.425	chr11	128714020	128720007	L1 repeats	L1PA3_LINE_L1
ASYNC_4829\16\0.266	chr12	20813261	20820428	L1 repeats	L1PA3_LINE_L1
ASYNC_4984\14\0.233	chr12	57990636	57993178	L1 repeats	L1PA16_LINE_L1
ASYNC_5205\15\0.375	chr13	33447964	33449511	L1 repeats	L1MC3_LINE_L1
ASYNC_5342\14\0.35	chr14	38155640	38156910	L1 repeats	L1PA15-16_LINE_L1
ASYNC_5663\16\0.4	chr15	66616879	66617140	L1 repeats	L1PA10_LINE_L1
ASYNC_5924\15\0.187	chr16	21497465	21498564	L1 repeats	L1M5_LINE_L1
ASYNC_6186\15\0.375	chr16	73433139	73433456	L1 repeats	L1MC5_LINE_L1
ASYNC_6391\76\1.9	chr17	20942749	20942978	L1 repeats	L1ME3_LINE_L1
ASYNC_7587\15\0.25	chr20	41428698	41429239	L1 repeats	L1PA16_LINE_L1
ASYNC_7904\14\0.35	chrX	16023491	16024418	L1 repeats	L1MA2_LINE_L1
ASYNC_8033\15\0.375	chrX	109732482	109745840	L1 repeats	L1PA4_LINE_L1
ASYNC_99\22\0.55	chr1	18651537	18651925	other repeats	MLT1I_LTR_MaLR
ASYNC_109\57\1.425	chr1	20639773	20640094	other repeats	MLT1J_LTR_MaLR
ASYNC_114\58\1.45	chr1	22627779	22628024	other repeats	MLT1J_LTR_MaLR
ASYNC_131\52\1.3	chr1	24448025	24448189	other repeats	MLT1J2_LTR_MaLR
ASYNC_146\15\0.25	chr1	26585296	26585406	other repeats	MLT2E_LTR_ERVL
ASYNC_182\86\2.15	chr1	31099431	31099868	other repeats	MLT1J_LTR_MaLR
ASYNC_219\14\0.233	chr1	37397146	37397602	other repeats	LTR67_LTR_ERVL
ASYNC_343\17\0.283	chr1	91790749	91791027	other repeats	MLT1J2_LTR_MaLR
ASYNC_351\14\0.233	chr1	94594854	94595186	other repeats	MER2B_DNA_MER2_type
ASYNC_356\15\0.375	chr1	96475125	96475297	other repeats	MER91A_DNA_Tip100
ASYNC_369\15\0.25	chr1	108367936	108368312	other repeats	MLT2A1_LTR_ERVL
ASYNC_371\14\0.233	chr1	108868831	108869207	other repeats	THE1C_LTR_MaLR
ASYNC_429\15\0.375	chr1	119997607	119997894	other repeats	MLT1K_LTR_MaLR
ASYNC_587\14\0.35	chr1	153860881	153863079	other repeats	HERV17_LTR_ERV1
ASYNC_659\20\0.5	chr1	162765517	162765916	other repeats	MSTA_LTR_MaLR
ASYNC_729\16\0.4	chr1	181226458	181226925	other repeats	LTR33A_LTR_ERVL
ASYNC_755\14\0.35	chr1	192693258	192693795	other repeats	MLT2A2_LTR_ERVL
ASYNC_779\22\0.55	chr1	201775648	201776101	other repeats	MLT1J1_LTR_MaLR
ASYNC_832\14\0.35	chr1	221293728	221295212	other repeats	L2_LINE_L2
ASYNC_877\20\0.2	chr1	234327170	234327245	other repeats	LTR10A_LTR_ERV1
ASYNC_899\292\7.3	chr1	245162164	245162195	other repeats	GC_rich_Low_complexity_Low_complexity
ASYNC_936\14\0.35	chr2	24548142	24548375	other repeats	MLT1J1_LTR_MaLR
ASYNC_1076\14\0.35	chr2	74527792	74528120	other repeats	MER63_DNA_AcHobo
ASYNC_1095\34\0.566	chr2	85581684	85582167	other repeats	LTR33A_LTR_ERVL
ASYNC_1112\15\0.375	chr2	91133760	91134911	other repeats	HSMAR2_DNA_Mariner
ASYNC_1191\16\0.4	chr2	132740398	132740578	other repeats	GA-rich_Low_complexity_Low_complexity
ASYNC_1192\20\0.166	chr2	132743413	132743636	other repeats	HERVIP10FH_LTR_ERV1
ASYNC_1209\29\0.181	chr2	161844917	161845371	other repeats	MER21B_LTR_ERV1
ASYNC_1343\28\0.7	chr3	13908323	13908402	other repeats	MLT1J_LTR_MaLR
ASYNC_1347\87\2.175	chr3	14336224	14336593	other repeats	MLT1J2_LTR_MaLR
ASYNC_1592\37\0.925	chr3	142848446	142848607	other repeats	LTR33A_LTR_ERVL
ASYNC_1618\14\0.35	chr3	153173886	153174407	other repeats	MER41C_LTR_ERV1
ASYNC_1651\14\0.35	chr3	165172658	165172863	other repeats	MLT1H1_LTR_MaLR
ASYNC_1653\15\0.375	chr3	167669135	167669517	other repeats	MSTD_LTR_MaLR
ASYNC_1735\37\0.925	chr3	198712674	198713144	other repeats	MLT1J_LTR_MaLR
ASYNC_1762\19\0.475	chr4	3727991	3728149	other repeats	MLT1J_LTR_MaLR
ASYNC_1789\14\0.175	chr4	39970419	39970810	other repeats	MLT1J_LTR_MaLR
ASYNC_1791\27\0.675	chr4	41541177	41541610	other repeats	MLT1J_LTR_MaLR
ASYNC_1800\26\0.65	chr4	55947049	55947507	other repeats	MLT1J_LTR_MaLR
ASYNC_1887\15\0.25	chr4	187969771	187970567	other repeats	LTR1B_LTR_ERV1
ASYNC_1888\17\0.425	chr4	188984947	188985079	other repeats	LTR33A_LTR_ERVL
ASYNC_1926\15\0.375	chr5	1954742	1955037	other repeats	MLT1E_LTR_MaLR
ASYNC_1936\18\0.45	chr5	3015547	3015849	other repeats	MER61C_LTR_ERV1
ASYNC_1941\14\0.35	chr5	3881930	3882090	other repeats	MLT1H2_LTR_MaLR
ASYNC_1951\16\0.4	chr5	5179630	5180054	other repeats	LTR53_LTR_ERVL
ASYNC_1967\16\0.266	chr5	5968940	5969514	other repeats	MLT1E2_LTR_MaLR
ASYNC_1969\14\0.233	chr5	6239706	6240565	other repeats	MER21C_LTR_ERV1
ASYNC_1978\14\0.35	chr5	6761285	6761614	other repeats	MLT1J_LTR_MaLR
ASYNC_2009\17\0.425	chr5	9986012	9986182	other repeats	MLT1J2_LTR_MaLR
ASYNC_2010\14\0.35	chr5	10115634	10116192	other repeats	MER89_LTR_ERV1
ASYNC_2034\14\0.35	chr5	10903669	10903735	other repeats	MLT1K_LTR_MaLR
ASYNC_2047\14\0.233	chr5	12324320	12324428	other repeats	LTR43_LTR_ERV1
ASYNC_2048\14\0.233	chr5	12573513	12573931	other repeats	MSTB_LTR_MaLR
ASYNC_2052\18\0.45	chr5	13293940	13294332	other repeats	MLT1H_LTR_MaLR
ASYNC_2055\15\0.125	chr5	13416687	13417214	other repeats	MLT2B2_LTR_ERVL
ASYNC_2057\14\0.35	chr5	13563158	13563634	other repeats	MLT1D_LTR_MaLR
ASYNC_2065\32\0.533	chr5	14114400	14114456	other repeats	LTR67_LTR_ERVL
ASYNC_2067\14\0.35	chr5	14178337	14178454	other repeats	MLT1I_LTR_MaLR
ASYNC_2091\14\0.35	chr5	15195685	15195924	other repeats	MER121_Unknown_Unknown
ASYNC_2096\17\0.425	chr5	15400701	15401102	other repeats	MLT1C_LTR_MaLR
ASYNC_2118\17\0.283	chr5	17349758	17350184	other repeats	MLT2B1_LTR_ERVL
ASYNC_2121\14\0.233	chr5	17538753	17539106	other repeats	MLT1E3_LTR_MaLR
ASYNC_2126\15\0.25	chr5	17742593	17742788	other repeats	MLT2F_LTR_ERVL
ASYNC_2136\16\0.4	chr5	18045989	18046230	other repeats	Arthur1_DNA_Tip100
ASYNC_2142\14\0.35	chr5	18423828	18424221	other repeats	MSTA_LTR_MaLR
ASYNC_2144\14\0.35	chr5	18635679	18635946	other repeats	MER74C_LTR_ERVL
ASYNC_2149\14\0.233	chr5	19082962	19083588	other repeats	LTR9B_LTR_ERV1
ASYNC_2150\16\0.4	chr5	19096835	19097160	other repeats	MER61A_LTR_ERV1
ASYNC_2152\17\0.425	chr5	19133213	19135538	other repeats	Tigger1_DNA_MER2_type
ASYNC_2156\15\0.25	chr5	19431794	19432185	other repeats	MLT1F2_LTR_MaLR
ASYNC_2165\14\0.35	chr5	20257879	20258041	other repeats	MER115_DNA_Tip100
ASYNC_2203\17\0.283	chr5	23382250	23382622	other repeats	THE1D_LTR_MaLR
ASYNC_2208\16\0.4	chr5	23810298	23810801	other repeats	MLT1E3_LTR_MaLR
ASYNC_2211\16\0.4	chr5	23865046	23865410	other repeats	THE1B_LTR_MaLR
ASYNC_2212\16\0.4	chr5	23897184	23897354	other repeats	LTR16A_LTR_ERVL
ASYNC_2221\14\0.35	chr5	24266785	24267404	other repeats	MER63C_DNA_AcHobo
ASYNC_2222\15\0.25	chr5	24307374	24307893	other repeats	MLT2A2_LTR_ERVL
ASYNC_2228\17\0.425	chr5	24883382	24885789	other repeats	Tigger2_DNA_MER2_type
ASYNC_2230\14\0.35	chr5	24983435	24983846	other repeats	MER76-int_LTR_ERVL
ASYNC_2232\14\0.35	chr5	25077685	25078292	other repeats	Tigger1_DNA_MER2_type
ASYNC_2244\14\0.35	chr5	26096572	26096892	other repeats	L2_LINE_L2
ASYNC_2246\14\0.35	chr5	26148943	26149804	other repeats	MER45B_DNA_Tip100
ASYNC_2247\14\0.35	chr5	26213442	26213584	other repeats	L4_LINE_RTE
ASYNC_2250\16\0.4	chr5	26495095	26495439	other repeats	MSTB_LTR_MaLR
ASYNC_2253\15\0.375	chr5	26645786	26646292	other repeats	MER1A_DNA_MER1_type
ASYNC_2255\14\0.35	chr5	26741141	26741655	other repeats	Tigger3b_DNA_MER2_type
ASYNC_2257\15\0.25	chr5	26814746	26814804	other repeats	MLT1H2_LTR_MaLR
ASYNC_2258\14\0.35	chr5	26904388	26904730	other repeats	Tigger5b_DNA_MER2_type
ASYNC_2264\18\0.3	chr5	27137144	27137477	other repeats	MER1B_DNA_MER1_type
ASYNC_2266\17\0.141	chr5	27327071	27327388	other repeats	MER1A_DNA_MER1_type
ASYNC_2268\15\0.375	chr5	27399357	27399716	other repeats	THE1B_LTR_MaLR
ASYNC_2269\16\0.266	chr5	27408876	27409097	other repeats	MER20_DNA_MER1_type
ASYNC_2270\19\0.475	chr5	27413561	27413786	other repeats	MLT2B4_LTR_ERVL
ASYNC_2274\16\0.4	chr5	27580568	27580950	other repeats	THE1C_LTR_MaLR
ASYNC_2275\14\0.35	chr5	27655961	27656468	other repeats	MER1A_DNA_MER1_type
ASYNC_2276\16\0.4	chr5	27760538	27760845	other repeats	THE1D_LTR_MaLR
ASYNC_2277\20\0.5	chr5	27786401	27786794	other repeats	MLT2B2_LTR_ERVL
ASYNC_2278\16\0.4	chr5	27817187	27818007	other repeats	MER54B_LTR_ERVL
ASYNC_2279\14\0.35	chr5	27822121	27822288	other repeats	MER74B_LTR_ERVL
ASYNC_2282\14\0.35	chr5	28048549	28049380	other repeats	HUERS-P3b_LTR_ERV1
ASYNC_2285\15\0.375	chr5	28185987	28186242	other repeats	Tigger7_DNA_MER2_type
ASYNC_2288\14\0.233	chr5	28541049	28546243	other repeats	HERVL-A2_LTR_ERVL
ASYNC_2289\14\0.35	chr5	28558623	28559021	other repeats	MER6_DNA_MER2_type
ASYNC_2291\19\0.475	chr5	28621411	28621719	other repeats	MLT1F1_LTR_MaLR
ASYNC_2295\14\0.35	chr5	29023195	29023687	other repeats	MLT2B3_LTR_ERVL
ASYNC_2297\15\0.25	chr5	29079257	29079668	other repeats	MER93a_LTR_ERV1
ASYNC_2298\14\0.35	chr5	29127898	29128357	other repeats	LTR2_LTR_ERV1
ASYNC_2301\15\0.25	chr5	29211472	29211814	other repeats	MLT2D_LTR_ERVL
ASYNC_2305\16\0.4	chr5	29290585	29290965	other repeats	MLT1A1_LTR_MaLR
ASYNC_2315\14\0.35	chr5	29794860	29795358	other repeats	LTR22C_LTR_ERVK
ASYNC_2319\14\0.35	chr5	30196805	30197396	other repeats	MER51A_LTR_ERV1
ASYNC_2320\15\0.375	chr5	30208604	30209060	other repeats	MLT1C_LTR_MaLR
ASYNC_2324\15\0.25	chr5	30873445	30874049	other repeats	L2_LINE_L2
ASYNC_2362\14\0.14	chr5	33302171	33302573	other repeats	LTR33_LTR_ERVL
ASYNC_2372\15\0.25	chr5	34557453	34557914	other repeats	LTR33_LTR_ERVL
ASYNC_2384\14\0.35	chr5	35562844	35562997	other repeats	MER45A_DNA_Tip100
ASYNC_2395\16\0.4	chr5	36461069	36461722	other repeats	MER21C_LTR_ERV1
ASYNC_2401\14\0.35	chr5	36791791	36791955	other repeats	LTR16D_LTR_ERVL
ASYNC_2428\15\0.375	chr5	37842715	37843126	other repeats	MLT1I_LTR_MaLR
ASYNC_2429\15\0.375	chr5	37961994	37962513	other repeats	MER74B_LTR_ERVL
ASYNC_2473\15\0.25	chr5	39704911	39705220	other repeats	MLT1J2_LTR_MaLR
ASYNC_2475\15\0.25	chr5	39708445	39708756	other repeats	MLT1J_LTR_MaLR
ASYNC_2477\14\0.35	chr5	39876285	39876734	other repeats	MLT1C_LTR_MaLR
ASYNC_2482\15\0.375	chr5	40053166	40054527	other repeats	MLT1B-int_LTR_MaLR
ASYNC_2484\14\0.35	chr5	40098484	40099154	other repeats	MLT-int_LTR_MaLR
ASYNC_2485\14\0.35	chr5	40276656	40277128	other repeats	MLT1H1_LTR_MaLR
ASYNC_2486\14\0.35	chr5	40324211	40324560	other repeats	LTR16A_LTR_ERVL
ASYNC_2506\17\0.425	chr5	41689989	41690353	other repeats	L2_LINE_L2
ASYNC_2545\14\0.35	chr5	43814928	43815312	other repeats	THE1D_LTR_MaLR
ASYNC_2548\15\0.375	chr5	44167209	44167627	other repeats	MSTA_LTR_MaLR
ASYNC_2553\16\0.4	chr5	44555497	44555622	other repeats	MER77_LTR_ERVL
ASYNC_2556\14\0.35	chr5	44694092	44696284	other repeats	Tigger2_DNA_MER2_type
ASYNC_2557\16\0.133	chr5	44743726	44743979	other repeats	MER1B_DNA_MER1_type
ASYNC_2568\16\0.4	chr5	52747895	52748227	other repeats	MLT1J1_LTR_MaLR
ASYNC_2603\15\0.25	chr5	71219181	71219596	other repeats	MLT1J_LTR_MaLR
ASYNC_2631\14\0.233	chr5	90844712	90844903	other repeats	L2_LINE_L2
ASYNC_2632\18\0.225	chr5	92667518	92667591	other repeats	MLT1J_LTR_MaLR
ASYNC_2642\14\0.35	chr5	99479642	99479847	other repeats	MER54B_LTR_ERVL
ASYNC_2656\38\0.95	chr5	114783281	114783755	other repeats	MLT1J_LTR_MaLR
ASYNC_2707\54\0.9	chr5	137996715	137996820	other repeats	MLT1J_LTR_MaLR
ASYNC_2751\16\0.4	chr5	153191852	153192028	other repeats	MLT1J2_LTR_MaLR
ASYNC_2773\14\0.233	chr5	171862734	171863029	other repeats	MLT1J2_LTR_MaLR
ASYNC_2781\21\0.525	chr5	173683612	173683751	other repeats	MLT1J1_LTR_MaLR
ASYNC_2783\17\0.283	chr5	175106494	175107006	other repeats	MLT1J_LTR_MaLR
ASYNC_2847\29\0.725	chr6	14908185	14908413	other repeats	MLT1J_LTR_MaLR
ASYNC_2853\17\0.425	chr6	20107940	20108364	other repeats	MLT1J1_LTR_MaLR
ASYNC_2855\16\0.266	chr6	21396129	21396473	other repeats	MLT1C_LTR_MaLR
ASYNC_2950\47\1.175	chr6	33891412	33891906	other repeats	LTR33A_LTR_ERVL
ASYNC_3021\28\0.7	chr6	64366279	64366839	other repeats	MLT2E_LTR_ERVL
ASYNC_3049\30\0.75	chr6	89829944	89830128	other repeats	U2_snRNA_snRNA
ASYNC_3060\14\0.35	chr6	101844715	101845066	other repeats	MLT1H_LTR_MaLR
ASYNC_3062\14\0.35	chr6	103688238	103688580	other repeats	MER51A_LTR_ERV1
ASYNC_3133\18\0.3	chr6	157050137	157050344	other repeats	GC_rich_Low_complexity_Low_complexity
ASYNC_3138\21\0.525	chr6	159415204	159415667	other repeats	MLT1J_LTR_MaLR
ASYNC_3160\88\2.2	chr7	1431868	1431971	other repeats	MLT1J_LTR_MaLR
ASYNC_3201\14\0.233	chr7	9337932	9338274	other repeats	MLT2B1_LTR_ERVL
ASYNC_3228\23\0.383	chr7	24425124	24425516	other repeats	MLT1J_LTR_MaLR
ASYNC_3231\16\0.4	chr7	25900458	25900846	other repeats	MLT1J2_LTR_MaLR
ASYNC_3235\14\0.35	chr7	27487304	27487738	other repeats	MLT1G_LTR_MaLR
ASYNC_3243\14\0.233	chr7	30492106	30492618	other repeats	MLT1D_LTR_MaLR
ASYNC_3252\15\0.25	chr7	34277877	34278013	other repeats	Kanga1_DNA_Tc2
ASYNC_3271\14\0.35	chr7	41938759	41939278	other repeats	L2_LINE_L2
ASYNC_3340\35\0.875	chr7	75659056	75659338	other repeats	MLT1J2_LTR_MaLR
ASYNC_3447\15\0.375	chr7	114489223	114489612	other repeats	MLT1K_LTR_MaLR
ASYNC_3644\15\0.25	chr8	73254615	73254760	other repeats	LTR50_LTR_ERVL
ASYNC_3645\14\0.35	chr8	73391352	73391517	other repeats	LTR50_LTR_ERVL
ASYNC_3685\15\0.375	chr8	101897733	101897850	other repeats	MLT1J_LTR_MaLR
ASYNC_3686\44\1.1	chr8	102235185	102235524	other repeats	MLT1J_LTR_MaLR
ASYNC_3688\35\0.875	chr8	103832532	103832702	other repeats	MLT1J_LTR_MaLR
ASYNC_3719\14\0.35	chr8	123691956	123692118	other repeats	MLT1I_LTR_MaLR
ASYNC_3738\20\0.5	chr8	126781456	126781944	other repeats	MLT1J_LTR_MaLR
ASYNC_3740\29\0.725	chr8	127591814	127592091	other repeats	MLT1J1_LTR_MaLR
ASYNC_3752\24\0.6	chr8	133201882	133202011	other repeats	MLT1J2_LTR_MaLR
ASYNC_3754\106\2.65	chr8	134472348	134472848	other repeats	MLT1J_LTR_MaLR
ASYNC_3891\47\0.587	chr9	89250441	89250922	other repeats	MLT1J_LTR_MaLR
ASYNC_3909\45\1.125	chr9	97229002	97229111	other repeats	C-rich_Low_complexity_Low_complexity
ASYNC_3924\15\0.25	chr9	101097030	101097316	other repeats	MLT1J_LTR_MaLR
ASYNC_3994\33\0.55	chr9	128590835	128591009	other repeats	MLT2F_LTR_ERVL
ASYNC_4043\46\1.15	chr9	131070855	131071293	other repeats	MLT1J2_LTR_MaLR
ASYNC_4045\14\0.233	chr9	131208526	131208826	other repeats	L2_LINE_L2
ASYNC_4059\45\0.75	chr9	132414367	132414553	other repeats	MLT1J2_LTR_MaLR
ASYNC_4097\25\0.625	chr9	137170995	137171364	other repeats	MLT1J_LTR_MaLR
ASYNC_4109\45\1.125	chr9	138788101	138788483	other repeats	MLT1J_LTR_MaLR
ASYNC_4205\28\0.7	chr10	71424209	71424301	other repeats	MLT1J_LTR_MaLR
ASYNC_4274\14\0.35	chr10	98551351	98551529	other repeats	GA-rich_Low_complexity_Low_complexity
ASYNC_4336\40\0.666	chr10	118936906	118937186	other repeats	MLT1J_LTR_MaLR
ASYNC_4370\16\0.266	chr10	132395502	132395866	other repeats	MLT1J1_LTR_MaLR
ASYNC_4379\17\0.283	chr11	354311	355032	other repeats	ERVL-E_LTR_ERVL
ASYNC_4425\14\0.175	chr11	25401508	25401958	other repeats	MSTB1_LTR_MaLR
ASYNC_4465\20\0.5	chr11	46227650	46227975	other repeats	MLT1J_LTR_MaLR
ASYNC_4494\22\0.366	chr11	47933253	47933643	other repeats	MLT1J1_LTR_MaLR
ASYNC_4656\94\2.35	chr11	68498850	68499027	other repeats	MLT1J2_LTR_MaLR
ASYNC_4657\40\0.666	chr11	68696800	68696928	other repeats	LTR33A_LTR_ERVL
ASYNC_4658\38\0.633	chr11	69154070	69154319	other repeats	MLT1J_LTR_MaLR
ASYNC_4660\22\0.11	chr11	69323524	69323943	other repeats	MLT1J_LTR_MaLR
ASYNC_4707\14\0.35	chr11	75804811	75804911	other repeats	ERVL-E_LTR_ERVL
ASYNC_4724\15\0.25	chr11	79687047	79687154	other repeats	MLT1J_LTR_MaLR
ASYNC_5025\14\0.35	chr12	90527230	90527733	other repeats	L2_LINE_L2
ASYNC_5100\35\0.583	chr12	111638780	111638973	other repeats	MLT1J_LTR_MaLR
ASYNC_5104\23\0.383	chr12	115814475	115814828	other repeats	MLT1J_LTR_MaLR
ASYNC_5128\19\0.475	chr12	119973074	119973229	other repeats	MLT1J_LTR_MaLR
ASYNC_5149\48\1.2	chr12	122621843	122622221	other repeats	MLT1J2_LTR_MaLR
ASYNC_5154\18\0.3	chr12	123291044	123291439	other repeats	MLT1J2_LTR_MaLR
ASYNC_5160\79\1.975	chr12	130293301	130293762	other repeats	MLT1J_LTR_MaLR
ASYNC_5161\15\0.25	chr12	130466337	130466797	other repeats	MLT1J_LTR_MaLR
ASYNC_5245\14\0.35	chr13	89427134	89427687	other repeats	MER41A_LTR_ERV1
ASYNC_5423\21\0.525	chr14	73373176	73373297	other repeats	MLT2E_LTR_ERVL
ASYNC_5439\14\0.35	chr14	76492745	76492789	other repeats	GC_rich_Low_complexity_Low_complexity
ASYNC_5593\15\0.375	chr15	46462575	46462876	other repeats	MLT1I_LTR_MaLR
ASYNC_5667\18\0.45	chr15	68038070	68038458	other repeats	MLT1J_LTR_MaLR
ASYNC_5675\20\0.333	chr15	71874026	71874540	other repeats	MLT1J_LTR_MaLR
ASYNC_5701\34\0.566	chr15	75615375	75615789	other repeats	MLT1J_LTR_MaLR
ASYNC_5730\25\0.625	chr15	87801270	87801696	other repeats	MLT1J_LTR_MaLR
ASYNC_5737\63\1.05	chr15	88866469	88866732	other repeats	MLT1J_LTR_MaLR
ASYNC_5752\14\0.35	chr15	95319809	95320185	other repeats	MLT1A1_LTR_MaLR
ASYNC_5874\23\0.575	chr16	5198006	5198391	other repeats	MLT1J2_LTR_MaLR
ASYNC_5877\89\2.225	chr16	9054593	9054689	other repeats	MLT1J1_LTR_MaLR
ASYNC_5878\67\1.675	chr16	9080255	9080694	other repeats	MLT1J_LTR_MaLR
ASYNC_5879\41\0.683	chr16	9141343	9141731	other repeats	MLT1J_LTR_MaLR
ASYNC_5885\18\0.45	chr16	11441597	11441852	other repeats	MLT1J2_LTR_MaLR
ASYNC_5935\14\0.35	chr16	23193695	23194134	other repeats	MLT1J2_LTR_MaLR
ASYNC_5946\14\0.233	chr16	24751038	24751390	other repeats	MLT1J_LTR_MaLR
ASYNC_6064\24\0.6	chr16	52833533	52833959	other repeats	MLT1J2_LTR_MaLR
ASYNC_6065\16\0.2	chr16	52907644	52907771	other repeats	MLT1J1_LTR_MaLR
ASYNC_6217\58\1.45	chr16	82857558	82857952	other repeats	MLT1J_LTR_MaLR
ASYNC_6222\30\0.75	chr16	84953652	84953995	other repeats	MLT1J_LTR_MaLR
ASYNC_6225\18\0.45	chr16	85543997	85544425	other repeats	LTR33A_LTR_ERVL
ASYNC_6226\79\1.316	chr16	85566527	85567036	other repeats	MLT1J_LTR_MaLR
ASYNC_6307\15\0.375	chr17	6172249	6172646	other repeats	MLT1J_LTR_MaLR
ASYNC_6369\56\1.4	chr17	17259978	17260443	other repeats	MLT1J_LTR_MaLR
ASYNC_6473\21\0.525	chr17	35781188	35781320	other repeats	MLT1J2_LTR_MaLR
ASYNC_6570\21\0.15	chr17	46804874	46805300	other repeats	MLT1J2_LTR_MaLR
ASYNC_6614\17\0.283	chr17	62357442	62357911	other repeats	LTR67_LTR_ERVL
ASYNC_6626\21\0.525	chr17	69698040	69698140	other repeats	MLT1J_LTR_MaLR
ASYNC_6628\26\0.433	chr17	69900676	69901119	other repeats	MLT1J2_LTR_MaLR
ASYNC_6739\18\0.3	chr18	21337324	21337897	other repeats	MLT2F_LTR_ERVL
ASYNC_6754\41\1.025	chr18	42158436	42158905	other repeats	MLT1J_LTR_MaLR
ASYNC_6965\27\0.675	chr19	13661087	13661267	other repeats	MLT1J2_LTR_MaLR
ASYNC_7155\21\0.525	chr19	46262764	46263150	other repeats	MLT1J_LTR_MaLR
ASYNC_7450\20\0.5	chr20	513071	513408	other repeats	MLT1J_LTR_MaLR
ASYNC_7479\14\0.35	chr20	17690186	17690506	other repeats	MLT1J2_LTR_MaLR
ASYNC_7480\54\1.35	chr20	17782824	17783187	other repeats	LTR33A_LTR_ERVL
ASYNC_7497\27\0.675	chr20	22614859	22615266	other repeats	LTR33A_LTR_ERVL
ASYNC_7575\38\0.95	chr20	36454481	36454951	other repeats	MLT1J1_LTR_MaLR
ASYNC_7586\14\0.35	chr20	41349824	41350053	other repeats	MLT1J_LTR_MaLR
ASYNC_7595\17\0.425	chr20	42353882	42354100	other repeats	MLT1J2_LTR_MaLR
ASYNC_7624\28\0.7	chr20	44756760	44756955	other repeats	MLT1J_LTR_MaLR
ASYNC_7650\62\1.55	chr20	48385064	48385415	other repeats	MLT1J1_LTR_MaLR
ASYNC_7651\33\0.825	chr20	48549411	48549635	other repeats	MLT1J_LTR_MaLR
ASYNC_7658\18\0.45	chr20	49390535	49390596	other repeats	MLT1J_LTR_MaLR
ASYNC_7661\16\0.4	chr20	50083138	50083621	other repeats	MLT1J_LTR_MaLR
ASYNC_7664\14\0.233	chr20	50390119	50390131	other repeats	LTR67_LTR_ERVL
ASYNC_7666\15\0.25	chr20	50944215	50944660	other repeats	MLT1C_LTR_MaLR
ASYNC_7667\25\0.625	chr20	51969031	51969153	other repeats	MLT1J_LTR_MaLR
ASYNC_7669\15\0.25	chr20	53522811	53522889	other repeats	MLT1J_LTR_MaLR
ASYNC_7709\15\0.375	chr21	10143060	10143558	other repeats	MLT1D_LTR_MaLR
ASYNC_7720\21\0.21	chr21	26980638	26980799	other repeats	MLT1J_LTR_MaLR
ASYNC_7721\14\0.35	chr21	28672500	28673699	other repeats	L2_LINE_L2
ASYNC_7744\37\0.616	chr21	34324359	34324509	other repeats	MLT1J2_LTR_MaLR
ASYNC_7745\23\0.383	chr21	34356051	34356488	other repeats	MLT1J_LTR_MaLR
ASYNC_7842\23\0.575	chr22	36168520	36168864	other repeats	MLT1J_LTR_MaLR
ASYNC_7915\15\0.375	chrX	20358434	20358619	other repeats	MER5A_DNA_MER1_type
ASYNC_7922\22\0.55	chrX	24354496	24354570	other repeats	LTR67_LTR_ERVL
ASYNC_7928\15\0.187	chrX	39427051	39427524	other repeats	MLT1H2_LTR_MaLR
ASYNC_7929\19\0.19	chrX	39493955	39494447	other repeats	MLT1J_LTR_MaLR
ASYNC_7931\40\1	chrX	39699948	39700414	other repeats	LTR33A_LTR_ERVL
ASYNC_7934\48\1.2	chrX	40741008	40741476	other repeats	MLT1J_LTR_MaLR
ASYNC_7937\25\0.625	chrX	43348279	43348715	other repeats	MLT2F_LTR_ERVL
ASYNC_7939\20\0.5	chrX	44395433	44395890	other repeats	LTR33A_LTR_ERVL
ASYNC_43\29\0.725	chr1	7936811	7936851		OTHER
ASYNC_44\14\0.35	chr1	7936951	7936991		OTHER
ASYNC_75\14\0.35	chr1	14458231	14458271		OTHER
ASYNC_148\14\0.35	chr1	26699431	26699471		OTHER
ASYNC_287\18\0.45	chr1	47989611	47989651		OTHER
ASYNC_370\14\0.233	chr1	108369911	108369971		OTHER
ASYNC_537\14\0.35	chr1	150709811	150709851		OTHER
ASYNC_606\15\0.25	chr1	154693771	154693831		OTHER
ASYNC_634\14\0.35	chr1	159013491	159013531		OTHER
ASYNC_676\14\0.35	chr1	166555771	166555811		OTHER
ASYNC_726\14\0.35	chr1	180939531	180939571		OTHER
ASYNC_738\14\0.233	chr1	183601551	183601611		OTHER
ASYNC_745\15\0.25	chr1	185049791	185049851		OTHER
ASYNC_750\14\0.35	chr1	189445971	189446011		OTHER
ASYNC_757\14\0.35	chr1	194231771	194231811		OTHER
ASYNC_760\14\0.35	chr1	197040271	197040311		OTHER
ASYNC_840\17\0.17	chr1	224382391	224382491		OTHER
ASYNC_908\19\0.475	chr2	2596331	2596371		OTHER
ASYNC_998\38\0.95	chr2	43025571	43025611		OTHER
ASYNC_1031\23\0.575	chr2	61844851	61844891		OTHER
ASYNC_1032\21\0.35	chr2	61845011	61845071		OTHER
ASYNC_1056\20\0.5	chr2	70223371	70223411		OTHER
ASYNC_1074\31\0.775	chr2	74200951	74200991		OTHER
ASYNC_1088\19\0.475	chr2	81502971	81503011		OTHER
ASYNC_1111\16\0.4	chr2	91133491	91133531		OTHER
ASYNC_1113\20\0.333	chr2	91137731	91137791		OTHER
ASYNC_1190\15\0.125	chr2	132739131	132739251		OTHER
ASYNC_1195\22\0.55	chr2	132749571	132749611		OTHER
ASYNC_1208\14\0.35	chr2	161843771	161843811		OTHER
ASYNC_1414\17\0.425	chr3	48249391	48249431		OTHER
ASYNC_1512\18\0.3	chr3	107160271	107160331		OTHER
ASYNC_1572\16\0.2	chr3	130828411	130828491		OTHER
ASYNC_1599\16\0.133	chr3	147776231	147776351		OTHER
ASYNC_1600\14\0.35	chr3	147968851	147968891		OTHER
ASYNC_1601\14\0.35	chr3	148400071	148400111		OTHER
ASYNC_1602\14\0.175	chr3	149223071	149223151		OTHER
ASYNC_1609\16\0.4	chr3	151557871	151557911		OTHER
ASYNC_1621\14\0.35	chr3	156504691	156504731		OTHER
ASYNC_1629\14\0.233	chr3	158254331	158254391		OTHER
ASYNC_1656\14\0.35	chr3	169359891	169359931		OTHER
ASYNC_1675\14\0.35	chr3	177865151	177865191		OTHER
ASYNC_1703\14\0.233	chr3	185888811	185888871		OTHER
ASYNC_1736\54\0.9	chr3	198866131	198866191		OTHER
ASYNC_1823\15\0.375	chr4	85605711	85605751		OTHER
ASYNC_1927\15\0.15	chr5	2037511	2037611		OTHER
ASYNC_1928\14\0.35	chr5	2119671	2119711		OTHER
ASYNC_1929\14\0.35	chr5	2256591	2256631		OTHER
ASYNC_1930\14\0.233	chr5	2278331	2278391		OTHER
ASYNC_1931\15\0.375	chr5	2685951	2685991		OTHER
ASYNC_1932\15\0.25	chr5	2883391	2883451		OTHER
ASYNC_1934\14\0.35	chr5	2903731	2903771		OTHER
ASYNC_1935\14\0.35	chr5	2907871	2907911		OTHER
ASYNC_1938\14\0.35	chr5	3388711	3388751		OTHER
ASYNC_1942\15\0.25	chr5	3957731	3957791		OTHER
ASYNC_1943\14\0.35	chr5	3977771	3977811		OTHER
ASYNC_1945\15\0.375	chr5	4294331	4294371		OTHER
ASYNC_1950\15\0.375	chr5	4951191	4951231		OTHER
ASYNC_1964\19\0.475	chr5	5636631	5636671		OTHER
ASYNC_1965\15\0.375	chr5	5693831	5693871		OTHER
ASYNC_1966\15\0.25	chr5	5712391	5712451		OTHER
ASYNC_1968\14\0.35	chr5	6111631	6111671		OTHER
ASYNC_1971\17\0.425	chr5	6471351	6471391		OTHER
ASYNC_1986\15\0.375	chr5	6941131	6941171		OTHER
ASYNC_1987\16\0.266	chr5	7101211	7101271		OTHER
ASYNC_1996\16\0.16	chr5	7986671	7986771		OTHER
ASYNC_1997\14\0.175	chr5	8236231	8236311		OTHER
ASYNC_2002\16\0.4	chr5	8521431	8521471		OTHER
ASYNC_2003\15\0.375	chr5	8657511	8657551		OTHER
ASYNC_2004\16\0.4	chr5	8748411	8748451		OTHER
ASYNC_2005\14\0.233	chr5	9035671	9035731		OTHER
ASYNC_2013\14\0.233	chr5	10274251	10274311		OTHER
ASYNC_2035\14\0.35	chr5	10973031	10973071		OTHER
ASYNC_2046\14\0.233	chr5	12293771	12293831		OTHER
ASYNC_2049\16\0.2	chr5	12860331	12860411		OTHER
ASYNC_2050\15\0.375	chr5	13219911	13219951		OTHER
ASYNC_2051\15\0.375	chr5	13244031	13244071		OTHER
ASYNC_2053\15\0.375	chr5	13365371	13365411		OTHER
ASYNC_2058\15\0.15	chr5	13607151	13607251		OTHER
ASYNC_2061\15\0.25	chr5	14064991	14065051		OTHER
ASYNC_2062\14\0.35	chr5	14070411	14070451		OTHER
ASYNC_2063\21\0.525	chr5	14089811	14089851		OTHER
ASYNC_2064\14\0.233	chr5	14091711	14091771		OTHER
ASYNC_2066\15\0.068	chr5	14140271	14140491		OTHER
ASYNC_2068\14\0.35	chr5	14185871	14185911		OTHER
ASYNC_2082\15\0.25	chr5	14605411	14605471		OTHER
ASYNC_2095\14\0.35	chr5	15394731	15394771		OTHER
ASYNC_2101\14\0.233	chr5	16006511	16006571		OTHER
ASYNC_2102\17\0.425	chr5	16107131	16107171		OTHER
ASYNC_2103\14\0.35	chr5	16258371	16258411		OTHER
ASYNC_2119\14\0.35	chr5	17377051	17377091		OTHER
ASYNC_2122\16\0.4	chr5	17555951	17555991		OTHER
ASYNC_2123\15\0.187	chr5	17672071	17672151		OTHER
ASYNC_2127\16\0.266	chr5	17756091	17756151		OTHER
ASYNC_2128\16\0.4	chr5	17762551	17762591		OTHER
ASYNC_2130\14\0.35	chr5	17823091	17823131		OTHER
ASYNC_2134\15\0.375	chr5	18025691	18025731		OTHER
ASYNC_2135\14\0.233	chr5	18028411	18028471		OTHER
ASYNC_2137\16\0.4	chr5	18047131	18047171		OTHER
ASYNC_2138\15\0.107	chr5	18074351	18074491		OTHER
ASYNC_2139\15\0.375	chr5	18113811	18113851		OTHER
ASYNC_2141\15\0.375	chr5	18360291	18360331		OTHER
ASYNC_2145\15\0.375	chr5	18844711	18844751		OTHER
ASYNC_2151\15\0.375	chr5	19128431	19128471		OTHER
ASYNC_2153\15\0.375	chr5	19208991	19209031		OTHER
ASYNC_2155\17\0.425	chr5	19412971	19413011		OTHER
ASYNC_2164\16\0.266	chr5	20231911	20231971		OTHER
ASYNC_2169\17\0.283	chr5	20522851	20522911		OTHER
ASYNC_2201\15\0.375	chr5	23093591	23093631		OTHER
ASYNC_2202\17\0.283	chr5	23276151	23276211		OTHER
ASYNC_2204\16\0.4	chr5	23463131	23463171		OTHER
ASYNC_2205\17\0.283	chr5	23638831	23638891		OTHER
ASYNC_2210\14\0.35	chr5	23853531	23853571		OTHER
ASYNC_2229\16\0.2	chr5	24974891	24974971		OTHER
ASYNC_2231\14\0.233	chr5	25056491	25056551		OTHER
ASYNC_2236\14\0.14	chr5	25411871	25411971		OTHER
ASYNC_2245\16\0.4	chr5	26105611	26105651		OTHER
ASYNC_2249\14\0.35	chr5	26489451	26489491		OTHER
ASYNC_2251\14\0.233	chr5	26535011	26535071		OTHER
ASYNC_2254\14\0.35	chr5	26683651	26683691		OTHER
ASYNC_2259\14\0.35	chr5	26906611	26906651		OTHER
ASYNC_2265\17\0.425	chr5	27181391	27181431		OTHER
ASYNC_2280\15\0.25	chr5	27899211	27899271		OTHER
ASYNC_2292\19\0.475	chr5	28661231	28661271		OTHER
ASYNC_2294\14\0.233	chr5	28764511	28764571		OTHER
ASYNC_2299\22\0.55	chr5	29142931	29142971		OTHER
ASYNC_2303\16\0.2	chr5	29258691	29258771		OTHER
ASYNC_2312\14\0.35	chr5	29542711	29542751		OTHER
ASYNC_2313\17\0.425	chr5	29750571	29750611		OTHER
ASYNC_2316\14\0.35	chr5	29858491	29858531		OTHER
ASYNC_2317\14\0.35	chr5	30100431	30100471		OTHER
ASYNC_2322\16\0.4	chr5	30367811	30367851		OTHER
ASYNC_2323\14\0.35	chr5	30387891	30387931		OTHER
ASYNC_2325\16\0.4	chr5	30917791	30917831		OTHER
ASYNC_2326\15\0.375	chr5	30971411	30971451		OTHER
ASYNC_2327\21\0.525	chr5	31205431	31205471		OTHER
ASYNC_2328\14\0.35	chr5	31209551	31209591		OTHER
ASYNC_2336\14\0.35	chr5	31673991	31674031		OTHER
ASYNC_2359\14\0.35	chr5	32944591	32944631		OTHER
ASYNC_2383\15\0.375	chr5	35506791	35506831		OTHER
ASYNC_2400\16\0.4	chr5	36772151	36772191		OTHER
ASYNC_2402\14\0.233	chr5	36890311	36890371		OTHER
ASYNC_2431\14\0.35	chr5	38025491	38025531		OTHER
ASYNC_2432\15\0.375	chr5	38147271	38147311		OTHER
ASYNC_2433\14\0.35	chr5	38154971	38155011		OTHER
ASYNC_2469\14\0.233	chr5	39502871	39502931		OTHER
ASYNC_2470\15\0.375	chr5	39542891	39542931		OTHER
ASYNC_2472\17\0.283	chr5	39679331	39679391		OTHER
ASYNC_2476\14\0.233	chr5	39743591	39743651		OTHER
ASYNC_2478\16\0.4	chr5	39916871	39916911		OTHER
ASYNC_2479\15\0.375	chr5	39924871	39924911		OTHER
ASYNC_2480\15\0.375	chr5	39963071	39963111		OTHER
ASYNC_2481\14\0.35	chr5	40023131	40023171		OTHER
ASYNC_2483\15\0.375	chr5	40071331	40071371		OTHER
ASYNC_2487\14\0.35	chr5	40469991	40470031		OTHER
ASYNC_2488\17\0.425	chr5	40534591	40534631		OTHER
ASYNC_2490\15\0.25	chr5	40608311	40608371		OTHER
ASYNC_2505\15\0.25	chr5	41682791	41682851		OTHER
ASYNC_2546\15\0.375	chr5	43932191	43932231		OTHER
ASYNC_2547\14\0.233	chr5	44124171	44124231		OTHER
ASYNC_2551\14\0.35	chr5	44481951	44481991		OTHER
ASYNC_2552\14\0.35	chr5	44487751	44487791		OTHER
ASYNC_2565\15\0.25	chr5	45848391	45848451		OTHER
ASYNC_2566\14\0.35	chr5	45936191	45936231		OTHER
ASYNC_2607\14\0.233	chr5	72762311	72762371		OTHER
ASYNC_2615\17\0.17	chr5	78323651	78323751		OTHER
ASYNC_2645\14\0.35	chr5	102827651	102827691		OTHER
ASYNC_2711\14\0.233	chr5	138877731	138877791		OTHER
ASYNC_2718\14\0.35	chr5	139954791	139954831		OTHER
ASYNC_2763\14\0.35	chr5	159524831	159524871		OTHER
ASYNC_2782\15\0.25	chr5	174963871	174963931		OTHER
ASYNC_2911\18\0.3	chr6	31696071	31696131		OTHER
ASYNC_2929\51\1.275	chr6	32204191	32204231		OTHER
ASYNC_2944\14\0.35	chr6	33467111	33467151		OTHER
ASYNC_3055\14\0.35	chr6	99535631	99535671		OTHER
ASYNC_3213\14\0.35	chr7	17968911	17968951		OTHER
ASYNC_3295\14\0.35	chr7	52955851	52955891		OTHER
ASYNC_3348\15\0.375	chr7	80541971	80542011		OTHER
ASYNC_3451\15\0.375	chr7	120852211	120852251		OTHER
ASYNC_3505\14\0.35	chr7	148270431	148270471		OTHER
ASYNC_3618\14\0.233	chr8	56048191	56048251		OTHER
ASYNC_3626\14\0.233	chr8	61727071	61727131		OTHER
ASYNC_3633\14\0.35	chr8	67026551	67026591		OTHER
ASYNC_3697\14\0.35	chr8	109612251	109612291		OTHER
ASYNC_3702\29\0.483	chr8	112317871	112317931		OTHER
ASYNC_3718\16\0.4	chr8	123644531	123644571		OTHER
ASYNC_3737\42\0.525	chr8	126645051	126645131		OTHER
ASYNC_3742\15\0.25	chr8	128646671	128646731		OTHER
ASYNC_3745\14\0.35	chr8	129583551	129583591		OTHER
ASYNC_3758\17\0.425	chr8	135913871	135913911		OTHER
ASYNC_3762\19\0.475	chr8	141543751	141543791		OTHER
ASYNC_3763\23\0.088	chr8	141543931	141544191		OTHER
ASYNC_3824\16\0.16	chr9	6671651	6671751		OTHER
ASYNC_3868\15\0.375	chr9	67911191	67911231		OTHER
ASYNC_3916\29\0.725	chr9	98678071	98678111		OTHER
ASYNC_3930\15\0.375	chr9	106770231	106770271		OTHER
ASYNC_3931\139\3.475	chr9	106770411	106770451		OTHER
ASYNC_3932\17\0.425	chr9	106770591	106770631		OTHER
ASYNC_3957\16\0.4	chr9	122139231	122139271		OTHER
ASYNC_4071\15\0.375	chr9	133238631	133238671		OTHER
ASYNC_4096\14\0.35	chr9	137158371	137158411		OTHER
ASYNC_4193\142\3.55	chr10	69279211	69279251		OTHER
ASYNC_4281\26\0.65	chr10	99476571	99476611		OTHER
ASYNC_4334\14\0.35	chr10	115862891	115862931		OTHER
ASYNC_4369\130\3.25	chr10	131799511	131799551		OTHER
ASYNC_4403\16\0.066	chr11	9342411	9342651		OTHER
ASYNC_4408\14\0.35	chr11	9592351	9592391		OTHER
ASYNC_4464\15\0.375	chr11	46221491	46221531		OTHER
ASYNC_4597\26\0.433	chr11	65001551	65001611		OTHER
ASYNC_4651\15\0.25	chr11	67812871	67812931		OTHER
ASYNC_4655\14\0.35	chr11	68495211	68495251		OTHER
ASYNC_4676\16\0.266	chr11	71946291	71946351		OTHER
ASYNC_4685\71\1.183	chr11	73168171	73168231		OTHER
ASYNC_4686\25\0.625	chr11	73168371	73168411		OTHER
ASYNC_4723\18\0.45	chr11	79613971	79614011		OTHER
ASYNC_4833\14\0.233	chr12	22639591	22639651		OTHER
ASYNC_4850\14\0.233	chr12	37692771	37692831		OTHER
ASYNC_4855\14\0.35	chr12	41745011	41745051		OTHER
ASYNC_4910\14\0.35	chr12	49899071	49899111		OTHER
ASYNC_4943\14\0.35	chr12	53918851	53918891		OTHER
ASYNC_5016\14\0.233	chr12	76032031	76032091		OTHER
ASYNC_5019\14\0.35	chr12	83902871	83902911		OTHER
ASYNC_5064\15\0.25	chr12	104335571	104335631		OTHER
ASYNC_5132\18\0.45	chr12	120609431	120609471		OTHER
ASYNC_5248\14\0.35	chr13	94794551	94794591		OTHER
ASYNC_5264\15\0.375	chr13	109125611	109125651		OTHER
ASYNC_5265\15\0.25	chr13	109397051	109397111		OTHER
ASYNC_5331\14\0.35	chr14	31421291	31421331		OTHER
ASYNC_5332\15\0.25	chr14	31471891	31471951		OTHER
ASYNC_5391\15\0.375	chr14	64233091	64233131		OTHER
ASYNC_5406\30\0.75	chr14	68361451	68361491		OTHER
ASYNC_5463\20\0.5	chr14	89919331	89919371		OTHER
ASYNC_5487\15\0.375	chr14	98674291	98674331		OTHER
ASYNC_5491\16\0.266	chr14	99728971	99729031		OTHER
ASYNC_5495\54\0.225	chr14	101484231	101484471		OTHER
ASYNC_5526\15\0.375	chr15	19385231	19385271		OTHER
ASYNC_5592\14\0.35	chr15	46435111	46435151		OTHER
ASYNC_5599\14\0.233	chr15	47742671	47742731		OTHER
ASYNC_5629\45\1.125	chr15	60469971	60470011		OTHER
ASYNC_5655\14\0.233	chr15	64775211	64775271		OTHER
ASYNC_5666\16\0.4	chr15	67824551	67824591		OTHER
ASYNC_5732\15\0.375	chr15	88482851	88482891		OTHER
ASYNC_5747\14\0.35	chr15	91176211	91176251		OTHER
ASYNC_5830\55\1.375	chr16	2858231	2858271		OTHER
ASYNC_5831\15\0.187	chr16	2858491	2858571		OTHER
ASYNC_5880\14\0.35	chr16	9740511	9740551		OTHER
ASYNC_5933\15\0.375	chr16	22602731	22602771		OTHER
ASYNC_6000\36\0.163	chr16	30553071	30553291		OTHER
ASYNC_6012\34\0.85	chr16	30724431	30724471		OTHER
ASYNC_6041\14\0.35	chr16	33859831	33859871		OTHER
ASYNC_6053\14\0.35	chr16	47651291	47651331		OTHER
ASYNC_6063\15\0.375	chr16	52785171	52785211		OTHER
ASYNC_6202\14\0.233	chr16	79494111	79494171		OTHER
ASYNC_6213\14\0.116	chr16	80831591	80831711		OTHER
ASYNC_6223\14\0.35	chr16	85016351	85016391		OTHER
ASYNC_6260\16\0.266	chr17	1118311	1118371		OTHER
ASYNC_6364\202\5.05	chr17	16379851	16379891		OTHER
ASYNC_6392\14\0.35	chr17	20943371	20943411		OTHER
ASYNC_6398\96\2.4	chr17	22807531	22807571		OTHER
ASYNC_6422\16\0.4	chr17	26900831	26900871		OTHER
ASYNC_6612\30\0.75	chr17	60549751	60549791		OTHER
ASYNC_6613\15\0.375	chr17	60549991	60550031		OTHER
ASYNC_6695\19\0.316	chr17	77412231	77412291		OTHER
ASYNC_6779\191\4.775	chr19	440011	440051		OTHER
ASYNC_6832\21\0.525	chr19	3295271	3295311		OTHER
ASYNC_6859\49\1.225	chr19	4528571	4528611		OTHER
ASYNC_6995\40\1	chr19	15808671	15808711		OTHER
ASYNC_7049\22\0.55	chr19	19338731	19338771		OTHER
ASYNC_7069\33\0.206	chr19	39317191	39317351		OTHER
ASYNC_7100\105\0.875	chr19	41114411	41114531		OTHER
ASYNC_7170\106\2.65	chr19	47464771	47464811		OTHER
ASYNC_7177\25\0.178	chr19	49131471	49131611		OTHER
ASYNC_7220\97\2.425	chr19	51122931	51122971		OTHER
ASYNC_7534\16\0.4	chr20	32387331	32387371		OTHER
ASYNC_7581\15\0.25	chr20	37467831	37467891		OTHER
ASYNC_7657\14\0.35	chr20	49336131	49336171		OTHER
ASYNC_7710\15\0.25	chr21	10162191	10162251		OTHER
ASYNC_7711\15\0.375	chr21	10167231	10167271		OTHER
ASYNC_7712\17\0.425	chr21	10167771	10167811		OTHER
ASYNC_7775\14\0.233	chr21	46321871	46321931		OTHER
ASYNC_7779\22\0.55	chr22	16032771	16032811		OTHER
ASYNC_7807\14\0.35	chr22	23676451	23676491		OTHER
ASYNC_7878\29\0.483	chr22	44810591	44810651		OTHER
ASYNC_7881\15\0.375	chr22	45336211	45336251		OTHER
ASYNC_7890\14\0.233	chrX	8039611	8039671		OTHER
ASYNC_7891\14\0.35	chrX	8946891	8946931		OTHER
ASYNC_7892\17\0.17	chrX	9333811	9333911		OTHER
ASYNC_7930\14\0.35	chrX	39656431	39656471		OTHER
ASYNC_7954\30\0.375	chrX	47765391	47765471		OTHER
ASYNC_7960\14\0.35	chrX	48419631	48419671		OTHER
ASYNC_7982\19\0.316	chrX	53041771	53041831		OTHER
ASYNC_8054\15\0.375	chrX	130792511	130792551		OTHER
ASYNC_8094\21\0.525	chrY	10641971	10642011		OTHER
ASYNC_8095\16\0.4	chrY	11947291	11947331		OTHER
ASYNC_8096\16\0.4	chrY	57387411	57387451		OTHER
ASYNC_8097\14\0.35	chrY	57411391	57411431		OTHER
	peaks in ensembl_ASYNC_no_gene_match_100.txt = 134 (Features = 112)
	peaks in tRNA_from_DB_ASYNC_no_gene_match_100.txt = 15 (Features = 16)
	peaks in tRNA_from_blat_ASYNC_no_gene_match_100.txt = 0 (Features = 0)
	peaks in RNA_ASYNC_no_gene_match_100.txt = 10 (Features = 9)
	peaks in RNA_only_from_blat_ASYNC_no_gene_match_100.txt = 2 (Features = 2)
	peaks in 5S_ASYNC_no_gene_match_100.txt = 0 (Features = 0)
	peaks in 5S_from_blat_ASYNC_no_gene_match_100.txt = 1 (Features = 1)
	peaks in miRNA_ASYNC_no_gene_match_100.txt = 1 (Features = 1)
	peaks in miRNA_from_blat_ASYNC_no_gene_match_100.txt = 0 (Features = 0)
	peaks in RefSeq_NR_genes_ASYNC_no_gene_match_100.txt = 10 (Features = 11)
	peaks in SIB_genes_ASYNC_no_gene_match_100.txt = 484 (Features = 465)
	peaks in SVA_ASYNC_no_gene_match_0.txt = 0 (Features = 0)
	peaks in Alus_ASYNC_no_gene_match_0.txt = 53 (Features = 53)
	peaks in mitochondrial_tRNAs_ASYNC_no_gene_match_100.txt = 0 (Features = 0)
	peaks in MIR_ASYNC_no_gene_match_0.txt = 8 (Features = 8)
	peaks in L1_repeats_ASYNC_no_gene_match_0.txt = 65 (Features = 65)
	peaks in Other_repeats_ASYNC_no_gene_match_0.txt = 269 (Features = 274)
	peaks in /data/ChIP_seq/Joelle/WHOLE/ASYNC/sissrs/ASYNC_no_gene_match.txt = 295
	Total peaks : 1347
