# Supplementary material for: HCFC1 is a common component of active human CpG-island promoters and coincides with ZNF143, THAP11, YY1, and GABP transcription factor occupancy
Source: HighWire-hosted journal article supplement (doi:10.1101/gr.150078.112), 2013-03-28
Supplement: Supplemental_Table3.xlsx [file Supplemental_Table3.xlsx]

## Sheet: Supp table 4.txt
RefSeq	Gene name	Gene description	-HCFC1 logFC	-HCFC1 Adj. P-value	S -HCFC1 logFC	S -HCFC1 adj.Pval	HCFC1 5P PROX peak	S-HCFC1 5P PROX peak	HCFC1 normalized counts	S-HCFC1 normalized counts	difference counts	Ratio of counts ((S+1)/(HCFC1+1))
NM_018081	WRAP53	WD repeat domain 79	0.187595	0.26488	0.362859	0.0116761	ASYNC_6336\98\2.45;ASYNC_6337\184\4.6	S_7668\76\1.9;S_7669\21\0.525;S_7670\167\4.175;S_7671\8\0.133	108	261	153	2.40367
NM_032207	C19orf44	hypothetical protein LOC84167	0.334109	0.0840586	0.388656	0.0491913	ASYNC_7001\243\6.075	S_8634\148\3.7;S_8635\205\5.125	128	281	153	2.18605
NM_015062	PPRC1	peroxisome proliferator-activated receptor	0.120486	0.46839	0.38267	0.00167016	ASYNC_4302\27\0.675;ASYNC_4303\306\7.65	S_4878\22\0.55;S_4879\221\5.525	123	273	150	2.20968
NM_016074	BOLA1	bolA-like 1	0.0913102	0.676228	0.303537	0.0353275	ASYNC_508\308\7.7	S_609\218\5.45	86	232	146	2.67816
NM_002819,NM_031990,NM_031991,NM_175847	PTBP1	polypyrimidine tract-binding protein 1 isoform	0.179203	0.111632	0.314195	0.0027323	ASYNC_6786\103\0.858;ASYNC_6787\17\0.283;ASYNC_6788\26\0.26	S_8335\153\3.825;S_8336\31\0.516;S_8337\9\0.225	50	182	132	3.58824
NM_001001716,NM_002503	NFKBIB	nuclear factor of kappa light polypeptide gene	0.266375	0.0869438	0.351793	0.0215274	ASYNC_7131\215\5.375;ASYNC_7132\36\0.9	S_8814\121\3.025;S_8815\45\1.125;S_8816\10\0.25	99	229	130	2.3
NM_138401	FAM125A	family with sequence similarity 125, member A	0.205127	0.138407	0.491507	0.000102328	ASYNC_7022\27\0.675;ASYNC_7023\110\1.833;ASYNC_7024\66\0.471	S_8665\117\2.925;S_8666\27\0.675;S_8667\76\1.9	86	214	128	2.47126
NM_014748	SNX17	sorting nexin 17	0.105322	0.570506	0.26983	0.0459651	ASYNC_962\326\8.15	S_1190\225\5.625	138	265	127	1.91367
NM_004697	PRPF4	PRP4 pre-mRNA processing factor 4 homolog	0.159573	0.1136	0.208187	0.0355354	ASYNC_3951\96\2.4	S_4419\8\0.133;S_4420\85\2.125;S_4421\80\2	51	175	124	3.38462
NM_015609	C1orf144	putative MAPK activating protein PM20,PM21	0.240554	0.312945	0.483773	0.0147878	ASYNC_82\79\1.975;ASYNC_83\18\0.45	S_107\17\0.425	31	153	122	4.8125
NM_021137	TNFAIP1	tumor necrosis factor, alpha-induced protein 1	0.044946	0.810189	-0.395639	8.15e-05	ASYNC_6400\203\1.268	S_7766\142\3.55;S_7767\96\2.4	110	227	117	2.05405
NM_032327,NM_198043,NM_198044,NM_198045	ZDHHC16	Abl-philin 2 isoform 1	-0.18442	0.0592141	-0.215142	0.0312893	ASYNC_4278\93\2.325	S_4839\106\2.65;S_4840\10\0.25	35	143	108	4
NM_198046	ZDHHC16_2	Abl-philin 2 isoform 1	-0.18442	0.0592141	-0.215142	0.0312893	ASYNC_4278\93\2.325	S_4839\106\2.65	35	143	108	4
NM_012099	CD3EAP	CD3E antigen, epsilon polypeptide associated	-0.115563	0.407816	0.243517	0.0296504	ASYNC_7207\130\3.25;ASYNC_7208\17\0.425	S_8941\161\4.025;S_8942\13\0.216	71	177	106	2.47222
NM_018467	USE1	uncharacterized hematopoietic stem/progenitor	0.134136	0.398211	0.343744	0.00522174	ASYNC_7009\100\2.5;ASYNC_7010\25\0.25	S_8645\109\2.725	51	155	104	3
NM_001211	BUB1B	budding uninhibited by benzimidazoles 1 beta	-0.0259152	0.916047	-0.254916	0.0340605	ASYNC_5550\250\6.25;ASYNC_5551\15\0.375	S_6630\208\5.2	85	189	104	2.2093
NM_000303	PMM2	phosphomannomutase 2	0.18584	0.0968735	0.438103	3.79e-05	ASYNC_5875\150\1.5	S_7054\110\2.75;S_7055\66\1.65	69	168	99	2.41429
NM_001039887	C19orf55	hypothetical protein LOC148137	0.239829	0.209181	0.433633	0.0102003	ASYNC_7096\15\0.375;ASYNC_7097\44\0.314;ASYNC_7098\68\1.7	S_8763\9\0.225;S_8764\20\0.5;S_8765\18\0.3;S_8766\26\0.65;S_8767\86\2.15	54	152	98	2.78182
NM_052936,NM_178270	ATG4A	autophagy-related cysteine endopeptidase 2	-0.209804	0.121993	-0.487871	0.000101417	ASYNC_8029\112\0.933	S_10101\77\1.925;S_10102\112\2.8	58	155	97	2.64407
NM_006331	EMG1	C2f protein	-0.0373971	0.836556	0.286568	0.00210227	ASYNC_4814\125\2.083;ASYNC_4815\22\0.366	S_5604\10\0.25;S_5605\104\2.6;S_5606\15\0.25	66	153	87	2.29851
NM_005105	RBM8A	RNA binding motif protein 8A	-0.232857	0.106011	-0.330982	0.0168969	ASYNC_490\50\0.833	S_583\67\1.675;S_584\17\0.283	25	107	82	4.15385
NM_012112	TPX2	TPX2, microtubule-associated protein homolog	-0.0582074	0.765156	-0.26085	0.023527	ASYNC_7511\103\2.575	S_9361\122\3.05;S_9362\8\0.2	46	125	79	2.68085
NM_033542	SYS1	SYS1 Golgi-localized integral membrane protein	0.172629	0.263434	0.440949	0.00704322	ASYNC_7605\56\1.4;ASYNC_7606\39\0.975;ASYNC_7607\16\0.266	S_9488\76\1.9;S_9489\27\0.675	29	103	74	3.46667
NM_173548	ZNF584	zinc finger protein 584	0.233398	0.0992153	0.380029	0.00445822	ASYNC_7429\123\3.075	S_9244\122\3.05	49	121	72	2.44
NM_014283	C1orf9	chromosome 1 open reading frame 9 protein	-0.00769416	0.986721	-0.4436	0.0340718	ASYNC_692\19\0.118;ASYNC_693\101\2.525	S_856\8\0.2;S_857\16\0.16;S_858\77\1.925	53	125	72	2.33333
NM_006621	AHCYL1	S-adenosylhomocysteine hydrolase-like 1	-0.0885593	0.599728	-0.606842	4.1e-07	ASYNC_391\116\2.9	S_524\109\2.725	30	101	71	3.29032
NM_014077	FAM32A	hypothetical protein LOC26017	0.149109	0.232254	0.24313	0.0300099	ASYNC_6999\69\1.15	S_8630\51\0.85	45	116	71	2.54348
NM_001037283,NM_003751	EIF3B	eukaryotic translation initiation factor 3,	0.0904788	0.619411	0.310677	0.0106175	ASYNC_3166\28\0.7;ASYNC_3167\43\1.075;ASYNC_3168\47\1.175	S_3410\11\0.11;S_3411\51\1.275	46	117	71	2.51064
NM_016227	C1orf9_2	chromosome 1 open reading frame 9 protein	-0.00769416	0.986721	-0.4436	0.0340718	ASYNC_692\19\0.118	S_856\8\0.2	53	123	70	2.2963
NM_012257	HBP1	HMG-box transcription factor 1	0.0753341	0.891842	-0.324675	0.00164957	ASYNC_3431\145\3.625;ASYNC_3432\25\0.625	S_3744\98\0.98	67	137	70	2.02941
NM_000414	HSD17B4	hydroxysteroid (17-beta) dehydrogenase 4	-0.124058	0.528049	-0.292024	0.0499139	ASYNC_2664\84\2.1	S_2731\110\2.75;S_2732\10\0.25	33	102	69	3.02941
NM_020412	CHMP1B	chromatin modifying protein 1B	-0.348778	0.0638687	-0.490243	0.00786788	ASYNC_6728\73\1.825	S_8239\80\2	24	91	67	3.68
NM_017667,NM_024553	CCDC132	coiled-coil domain containing 132 isoform a	-0.121573	0.486332	-0.336134	0.00897203	ASYNC_3364\146\1.46	S_3647\10\0.25;S_3648\66\1.65;S_3649\55\1.375	81	148	67	1.81707
NM_015710	GLTSCR2	glioma tumor suppressor candidate region gene 2	0.0395049	0.851614	0.333894	0.00174691	ASYNC_7232\41\1.025	S_8980\47\1.175;S_8981\12\0.15	15	79	64	5
NM_033088	FAM40A	hypothetical protein LOC85369	0.0978906	0.597286	0.270387	0.0397739	ASYNC_393\135\2.25	S_525\103\2.575	58	122	64	2.08475
NM_006368	CREB3	cAMP responsive element binding protein 3	0.214859	0.07741	0.259446	0.0347207	ASYNC_3849\45\0.562;ASYNC_3850\99\2.475	S_4285\15\0.375;S_4286\15\0.375;S_4287\94\2.35	61	124	63	2.01613
NM_017644	KLHL24	DRE1 protein	-0.353268	0.281314	-0.654959	0.01975	ASYNC_1689\112\2.8	S_2162\115\2.875	37	99	62	2.63158
NM_018074	CCDC94	coiled-coil domain containing 94	0.204958	0.222728	0.309672	0.0453945	ASYNC_6854\59\1.475;ASYNC_6855\14\0.35	S_8427\73\1.825;S_8428\14\0.35	32	93	61	2.84848
NM_014484	MOCS3	molybdenum cofactor synthesis 3	0.166862	0.37598	0.380742	0.0111322	ASYNC_7655\36\0.9;ASYNC_7656\29\0.725	S_9562\26\0.65;S_9563\37\0.925	27	87	60	3.14286
NM_001048197,NM_001048198,NM_001048199	SNHG3-RCC1	regulator of chromosome condensation 1	0.193573	0.132916	0.330028	0.00549441	ASYNC_170\21\0.525	S_228\22\0.366;S_229\30\0.75	12	71	59	5.53846
NM_014547	TMOD3	tropomodulin 3 (ubiquitous)	-0.368169	0.143521	-0.648924	0.004809	ASYNC_5607\117\2.925	S_6704\70\1.75;S_6705\8\0.133	25	83	58	3.23077
NM_003366	UQCRC2	ubiquinol-cytochrome c reductase core protein	-0.128909	0.320236	-0.230011	0.0388178	ASYNC_5926\29\0.725;ASYNC_5927\55\1.375	S_7125\9\0.112;S_7126\18\0.45;S_7127\40\1;S_7128\8\0.2	39	97	58	2.45
NM_181575	AUP1	ancient ubiquitous protein 1	0.152324	0.345656	0.309502	0.0198975	ASYNC_1083\203\5.075	S_1379\165\4.125	12	69	57	5.38462
NM_080822	OVCA2	candidate tumor suppressor in ovarian cancer 2	0.188268	0.300021	0.356021	0.0209161	ASYNC_6270\95\2.375	S_7579\70\1.75;S_7580\10\0.25;S_7581\13\0.216	28	85	57	2.96552
NM_006101	NDC80	kinetochore associated 2	-0.332893	0.0581861	-0.471577	0.00629101	ASYNC_6713\16\0.4;ASYNC_6714\70\1.75	S_8216\9\0.225;S_8217\10\0.166;S_8218\57\1.425	39	95	56	2.4
NM_013300	C12orf24	hypothetical protein LOC29902	-0.0261041	0.889179	0.272801	0.00293677	ASYNC_5087\27\0.675	S_5985\10\0.25;S_5986\46\1.15	14	69	55	4.66667
NM_000123	ERCC5	XPG-complementing protein	-0.204017	0.226547	-0.36883	0.012721	ASYNC_5256\54\0.9	S_6224\62\1.55;S_6225\20\0.5	28	83	55	2.89655
NM_052879,NM_199188,NM_199190	LARP4	c-Mpl binding protein isoform a	-0.259056	0.104787	-0.490465	0.000973698	ASYNC_4900\38\0.633	S_5725\56\1.4;S_5726\9\0.225	25	79	54	3.07692
NM_002815	PSMD11	proteasome 26S non-ATPase subunit 11	0.205148	0.226277	0.422635	0.00383174	ASYNC_6427\260\6.5	S_7804\131\3.275	81	135	54	1.65854
NM_005412	SHMT2	serine hydroxymethyltransferase 2	0.241593	0.0674015	0.332931	0.0102391	ASYNC_4972\75\1.875	S_5844\67\1.675	26	79	53	2.96296
NM_033025	SYDE1	synapse defective 1, Rho GTPase, homolog 1	0.26288	0.22073	0.413302	0.0341766	ASYNC_6986\100\2.5	S_8613\109\2.725	48	101	53	2.08163
NM_144689	ZNF420	zinc finger protein 420	-0.541823	0.064646	-0.703345	0.01576	ASYNC_7113\15\0.375;ASYNC_7114\159\3.975	S_8785\154\3.85;S_8786\8\0.2	69	122	53	1.75714
NM_006090	CEPT1_2	choline/ethanolaminephosphotransferase	-0.134141	0.484971	-0.360122	0.0112853	ASYNC_399\48\0.8	S_532\48\1.2;S_533\8\0.2;S_534\8\0.133	39	91	52	2.3
NM_018051	WDR60	WD repeat domain 60	0.149557	0.271892	0.314142	0.00614079	ASYNC_3540\49\1.225	S_3886\14\0.35;S_3887\52\1.3	12	63	51	4.92308
NM_006666	RUVBL2	RuvB-like 2	0.0154294	0.956992	0.322615	0.00888713	ASYNC_7278\40\0.4	S_9051\50\1.25	16	66	50	3.94118
NM_002707	PPM1G	protein phosphatase 1G	0.163482	0.250534	0.29962	0.0152509	ASYNC_964\14\0.35	S_1194\16\0.4;S_1195\10\0.166	33	83	50	2.47059
NM_173627	FLJ35220	hypothetical protein LOC284131	0.129028	0.502179	0.396645	0.00416065	ASYNC_6678\49\0.816;ASYNC_6679\44\1.1	S_8170\50\1.25;S_8171\40\1	39	89	50	2.25
NM_031488	L3MBTL2	l(3)mbt-like 2	0.0487319	0.846513	0.370034	0.0239323	ASYNC_7860\94\1.566	S_9840\76\1.9	47	97	50	2.04167
NM_030938	TMEM49	transmembrane protein 49	-0.107629	0.533123	-0.280269	0.0268737	ASYNC_6586\17\0.425;ASYNC_6587\18\0.3	S_8036\30\0.75;S_8037\21\0.525	6	55	49	8
NM_145206	VTI1A	SNARE Vti1a-beta protein	0.0919866	0.725933	0.41962	0.00822119	ASYNC_4331\25\0.416;ASYNC_4332\38\0.95	S_4924\14\0.35;S_4925\48\1.2	24	73	49	2.96
NM_014708	KNTC1	Rough Deal homolog, centromere/kinetochore	-0.000326952	0.998907	-0.289984	0.0169691	ASYNC_5140\22\0.55;ASYNC_5141\17\0.425	S_6063\20\0.5;S_6064\13\0.325;S_6065\26\0.65;S_6066\14\0.35	30	79	49	2.58065
NM_153358	ZNF791	zinc finger protein 791	-0.0418451	0.871857	0.291814	0.030605	ASYNC_6940\29\0.725	S_8547\49\1.225;S_8548\16\0.266	10	57	47	5.27273
NM_014607	UBXN4	UBX domain containing 2	-0.158652	0.514748	-0.421875	0.0181114	ASYNC_1199\72\1.8	S_1516\66\1.65	20	66	46	3.19048
NM_018975	TERF2IP	telomeric repeat binding factor 2, interacting	-0.188526	0.156239	-0.318673	0.00875382	ASYNC_6194\37\0.925;ASYNC_6195\17\0.283;ASYNC_6196\14\0.35	S_7467\39\0.975	29	75	46	2.53333
NM_130897	DYNLRB2	dynein, light chain, roadblock-type 2	-0.0229733	0.962721	0.452307	0.0402074	ASYNC_6201\39\0.65	S_7472\10\0.25;S_7473\10\0.25;S_7474\31\0.775	15	60	45	3.8125
NM_014347	ZNF324	zinc finger protein 324	0.205687	0.184146	0.28941	0.0490994	ASYNC_7431\89\2.225	S_9246\74\1.85;S_9247\13\0.216	36	81	45	2.21622
NM_001081559,NM_006693	CPSF4	cleavage and polyadenylation specific factor 4,	0.196448	0.0990316	0.478376	2.51e-05	ASYNC_3377\64\1.066	S_3664\10\0.25;S_3665\39\0.975	23	67	44	2.83333
NM_198486	RPL7L1	ribosomal protein L7-like 1	0.0738608	0.632971	0.269662	0.00787564	ASYNC_2983\47\0.783;ASYNC_2984\19\0.475	S_3183\35\0.875;S_3184\15\0.375	29	73	44	2.46667
NM_005831	CALCOCO2	calcium binding and coiled-coil domain 2	-0.116629	0.468524	-0.294447	0.0151071	ASYNC_6550\100\2.5	S_7982\118\2.95	33	77	44	2.29412
NM_006012	CLPP	endopeptidase Clp precursor	0.171562	0.317629	0.346083	0.0152349	ASYNC_6877\85\2.125	S_8457\48\1.2	25	68	43	2.65385
NM_178336,NM_180982,NM_181304,NM_181305,NM_181306,NM_181307	MRPL52	mitochondrial ribosomal protein L52 isoform a	0.12652	0.43999	0.268846	0.0392233	ASYNC_5300\37\0.925	S_6286\32\0.8	13	55	42	4
NM_001970	EIF5A	eukaryotic translation initiation factor 5A	0.206941	0.106613	0.262911	0.0387139	ASYNC_6322\14\0.175	S_7647\18\0.45	16	58	42	3.47059
NM_032492	JAGN1	jagunal homolog 1	0.044575	0.835369	0.281595	0.0127308	ASYNC_1329\36\0.6	S_1712\28\0.7;S_1713\13\0.325	12	53	41	4.15385
NM_152442	RAD9B	RAD9 homolog B	-0.35197	0.0690505	-0.438844	0.0237522	ASYNC_5088\25\0.625	S_5988\33\0.55	22	63	41	2.78261
NM_017841	C11orf79	hypothetical protein LOC54949	0.214392	0.0618433	0.306207	0.00646201	ASYNC_4522\60\1	S_5186\27\0.27	32	73	41	2.24242
NM_207115	ZNF580	zinc finger protein 580	0.176756	0.334693	0.342011	0.0254492	ASYNC_7384\35\0.875	S_9188\31\0.775;S_9189\12\0.12	15	55	40	3.5
NM_138473	SP1	Sp1 transcription factor isoform a	-0.048854	0.829652	-0.272403	0.0271947	ASYNC_4926\14\0.35	S_5758\10\0.25;S_5759\11\0.275;S_5760\9\0.225	15	53	38	3.375
NM_005444	RQCD1	RCD1 required for cell differentiation1 homolog	0.168403	0.170988	0.245772	0.0336664	ASYNC_1272\25\0.625	S_1624\21\0.525	16	54	38	3.23529
NM_016034	MRPS2	mitochondrial ribosomal protein S2	0.179121	0.283351	0.356651	0.0113066	ASYNC_4098\63\1.575	S_4604\33\0.33	21	59	38	2.72727
NM_001127397,NM_001127398,NM_015701	C2orf30	erlectin isoform 2	-0.0852885	0.659721	-0.277094	0.0319533	ASYNC_1015\59\0.983	S_1284\47\1.175	23	61	38	2.58333
NM_014346	TBC1D22A	TBC1 domain family, member 22A	0.309163	0.118773	0.2832	0.00187764	ASYNC_7882\54\1.35	S_9872\31\0.775;S_9873\12\0.3	23	60	37	2.54167
NM_016183	MRTO4	ribosomal protein P0-like protein	-0.0379871	0.906469	0.412785	0.00793272	ASYNC_103\54\1.35;ASYNC_104\47\1.175	S_135\21\0.525;S_136\26\0.65	46	83	37	1.78723
NM_024653	PRKRIP1	PRKR interacting protein 1 (IL11 inducible)	0.27942	0.0542007	0.316271	0.0343831	ASYNC_3415\26\0.433	S_3723\19\0.475	13	47	34	3.42857
NM_016640	MRPS30	mitochondrial ribosomal protein S30	0.0128224	0.951318	0.211479	0.0229538	ASYNC_2560\20\0.2;ASYNC_2561\46\1.15	S_2609\26\0.433;S_2610\27\0.675	36	70	34	1.91892
NM_012423	RPL13A	ribosomal protein L13a	-0.0316101	0.85717	0.218634	0.0160407	ASYNC_7289\59\0.368;ASYNC_7290\32\0.4	S_9068\20\0.5;S_9069\14\0.35	37	71	34	1.89474
NM_133452	RAVER1	RAVER1	0.236372	0.275158	0.407066	0.0319152	ASYNC_6923\16\0.4;ASYNC_6924\16\0.266	S_8513\8\0.2	18	51	33	2.73684
NM_001383	DPH1	diptheria toxin resistance protein required for	0.188268	0.300021	0.356021	0.0209161	ASYNC_6269\71\1.775	S_7578\65\1.625	26	59	33	2.22222
NM_004453	ETFDH	electron-transferring-flavoprotein dehydrogenase	-0.344394	0.0587498	-0.492609	0.00582674	ASYNC_1870\54\0.675;ASYNC_1871\16\0.4	S_2402\46\1.15;S_2403\16\0.4	26	58	32	2.18519
NM_003824	FADD	Fas-associated via death domain	0.114648	0.403213	0.25345	0.0198463	ASYNC_4661\55\1.375	S_5392\37\0.925	27	59	32	2.14286
NM_017752,NM_198881	TBC1D8B	TBC1 domain family, member 8B (with GRAM domain)	-0.426633	0.0754796	-0.885376	0.000119545	ASYNC_8027\65\1.625	S_10096\48\1.2	24	55	31	2.24
NM_004939	DDX1	DEAD (Asp-Glu-Ala-Asp) box polypeptide 1	-0.158096	0.167395	-0.259028	0.0134351	ASYNC_922\81\2.025	S_1141\52\1.3;S_1142\12\0.3	26	57	31	2.14815
NM_005109	OXSR1	oxidative-stress responsive 1	-0.135799	0.292132	-0.242762	0.029077	ASYNC_1372\19\0.118;ASYNC_1373\52\1.3;ASYNC_1374\28\0.7	S_1770\19\0.475;S_1771\26\0.325;S_1772\13\0.325	41	72	31	1.7381
NM_152835	PDIK1L	PDLIM1 interacting kinase 1 like	-0.271792	0.19766	-0.498122	0.00772274	ASYNC_141\16\0.08	S_187\11\0.183;S_188\11\0.275	9	39	30	4
NM_018229	MUDENG	Mu-2 related death-inducing protein	-0.0825212	0.727373	-0.360697	0.0123109	ASYNC_5374\21\0.35	S_6409\10\0.166;S_6410\26\0.65	12	42	30	3.30769
NM_016133	INSIG2	insulin induced protein 2	-0.23409	0.293624	-0.501147	0.00684643	ASYNC_1171\72\1.8	S_1474\42\1.05	25	55	30	2.15385
NM_152856,NM_005676	RBM10	RNA binding motif protein 10 isoform 2	0.259217	0.0759733	0.375475	0.00807946	ASYNC_7945\15\0.25	S_9968\11\0.275;S_9969\9\0.15;S_9970\11\0.275	16	45	29	2.70588
NM_003420	ZNF35	zinc finger protein 35	0.225605	0.12614	0.312017	0.0282613	ASYNC_1394\59\1.475	S_1797\46\1.15	26	55	29	2.07407
NM_003435	ZNF134	zinc finger protein 134	0.173887	0.41115	0.384058	0.0217294	ASYNC_7410\56\1.4	S_9223\51\1.275	26	55	29	2.07407
NM_017914	C19orf24	hypothetical protein LOC55009	0.0376333	0.883408	0.349101	0.0060706	ASYNC_6799\14\0.35;ASYNC_6800\33\0.825	S_8351\28\0.7	18	45	27	2.42105
NM_005370	RAB8A	mel transforming oncogene	0.147065	0.165712	0.218714	0.0278415	ASYNC_6997\16\0.4;ASYNC_6998\15\0.15	S_8628\9\0.225;S_8629\10\0.25	15	40	25	2.5625
NM_174899	FBXO36	F-box protein 36	-0.0160831	0.973287	0.427369	0.0199838	ASYNC_1283\15\0.25	S_1650\16\0.2;S_1651\10\0.25	23	48	25	2.04167
NM_018983,NM_032993	GAR1	nucleolar protein family A, member 1	0.0371525	0.842677	0.210706	0.0365338	ASYNC_1840\18\0.45	S_2360\32\0.8;S_2361\8\0.133	13	36	23	2.64286
NM_016647	C8orf55	mesenchymal stem cell protein DSCD75	-0.073496	0.743285	0.29741	0.0312511	ASYNC_3771\15\0.375;ASYNC_3772\22\0.366	S_4175\8\0.133	14	37	23	2.53333
NM_014041	SPCS1	signal peptidase complex subunit 1 homolog	0.0757584	0.520372	0.19824	0.0220102	ASYNC_1472\30\0.75;ASYNC_1473\48\1.2	S_1897\20\0.5;S_1898\23\0.575;S_1899\21\0.35;S_1900\10\0.25	45	68	23	1.5
NM_024757,NM_001145527	EHMT1	euchromatic histone-lysine N-methyltransferase	0.0707103	0.747501	0.294454	0.0277423	ASYNC_4129\32\0.8;ASYNC_4130\22\0.366	S_4646\12\0.2;S_4647\24\0.6;S_4648\10\0.166;S_4649\15\0.375	39	61	22	1.55
NM_198935	SS18L1	SS18-like protein 1	-0.172422	0.416033	-0.40813	0.0134073	ASYNC_7681\23\0.575	S_9594\8\0.1	7	27	20	3.5
NM_177967	UBAC2	UBA domain containing 2 isoform 2	0.206722	0.0762352	0.314706	0.00511465	ASYNC_5249\22\0.183	S_6210\12\0.3	10	29	19	2.72727
NM_032309	CHCHD5	coiled-coil-helix-coiled-coil-helix domain	0.114194	0.604656	0.371378	0.0131374	ASYNC_1168\34\0.566	S_1471\21\0.35	15	34	19	2.1875
NM_019109	ALG1	beta-1,4-mannosyltransferase	0.232896	0.186186	0.365806	0.0237833	ASYNC_5873\26\0.433	S_7052\14\0.35	9	27	18	2.8
NM_012310	KIF4A	kinesin family member 4	-0.112938	0.438256	-0.255167	0.0250741	ASYNC_8001\17\0.425	S_10055\16\0.4	12	30	18	2.38462
NM_170692	RASAL2	RAS protein activator like 2 isoform 2	0.216114	0.172373	0.304346	0.0435491	ASYNC_714\22\0.55	S_878\24\0.6	12	30	18	2.38462
NM_005765	ATP6AP2	ATPase, H+ transporting, lysosomal accessory	-0.261512	0.195264	-0.379763	0.0446821	ASYNC_7932\22\0.55	S_9945\12\0.3	15	33	18	2.125
NM_017825	ADPRHL2	ADP-ribosylhydrolase like 2	0.155626	0.267161	0.283268	0.0195396	ASYNC_210\77\0.641	S_287\26\0.65	48	66	18	1.36735
NM_138575	PGAM5	phosphoglycerate mutase family member 5	0.0773904	0.779317	0.435143	0.00032008	ASYNC_5167\27\0.192	S_6106\11\0.275	10	27	17	2.54545
NM_003276	TMPO_2	thymopoietin isoform alpha	-0.155923	0.466271	-0.378142	0.0202947	ASYNC_5046\17\0.425	S_5930\8\0.2	14	31	17	2.13333
NM_000244,NM_130799	MEN1_1	menin isoform 1	-0.0564236	0.815005	0.357946	0.0054784	ASYNC_4578\128\3.2	S_5283\98\2.45	6	22	16	3.28571
NM_130800,NM_130801	MEN1	menin isoform 1	-0.0564236	0.815005	0.357946	0.0054784	ASYNC_4578\128\3.2;ASYNC_4579\135\3.375	S_5283\98\2.45;S_5284\167\4.175	6	22	16	3.28571
NM_130802	MEN1_2	menin isoform 1	-0.0564236	0.815005	0.357946	0.0054784	ASYNC_4578\128\3.2	S_5283\98\2.45	6	22	16	3.28571
NM_024854	PYROXD1	pyridine nucleotide-disulphide oxidoreductase	-0.146003	0.63154	-0.425671	0.0435491	ASYNC_4830\29\0.725	S_5638\19\0.316	12	28	16	2.23077
NM_001025238,NM_001025239,NM_003271	TSPAN4	tetraspanin 4 isoform a	0.122613	0.376955	0.296254	0.00684682	ASYNC_4385\32\0.8	S_5007\9\0.225;S_5008\28\0.7	18	34	16	1.84211
NM_001025235,NM_001025236	TSPAN4_2	tetraspanin 4 isoform a	0.122613	0.376955	0.296254	0.00684682	ASYNC_4385\32\0.8	S_5007\9\0.225	18	33	15	1.78947
NM_015971	MRPS7	mitochondrial ribosomal protein S7	0.172793	0.16227	0.239993	0.042529	ASYNC_6638\26\0.65;ASYNC_6639\47\1.175	S_8106\23\0.575;S_8107\27\0.675	40	55	15	1.36585
NM_007359	CASC3	metastatic lymph node 51	-0.284701	0.0655012	-0.373351	0.014795	ASYNC_6469\15\0.375;ASYNC_6470\27\0.45	S_7857\10\0.25	15	28	13	1.8125
NM_001098209,NM_001098210,NM_001904	CTNNB1	catenin (cadherin-associated protein), beta 1,	-0.0575636	0.840794	-0.352216	0.0197589	ASYNC_1385\21\0.35	S_1785\13\0.216	8	20	12	2.33333
NM_025077	TOE1	target of EGR1, member 1 (nuclear)	0.148434	0.293316	0.403044	0.00049156	ASYNC_272\22\0.122	S_371\12\0.2	21	33	12	1.54545
NM_000293,NM_001031835	PHKB	phosphorylase kinase, beta isoform a	-0.207931	0.0947313	-0.365023	0.00181346	ASYNC_6047\37\0.231;ASYNC_6048\33\0.825	S_7288\13\0.216;S_7289\15\0.375	31	43	12	1.375
NM_001098625,NM_016475	C14orf100	JNK1-associated membrane protein isoform 2	-0.326836	0.103851	-0.398996	0.0480949	ASYNC_5381\14\0.35	S_6420\8\0.2	15	26	11	1.6875
NM_006218	PIK3CA	phosphoinositide-3-kinase, catalytic, alpha	0.132816	0.565517	-0.345425	0.039412	ASYNC_1677\63\1.575	S_2151\41\1.025	36	47	11	1.2973
NM_001004127	ALG11	asparagine-linked glycosylation 11,	-0.166962	0.326802	-0.318556	0.0260443	ASYNC_5233\14\0.35	S_6184\8\0.133	3	13	10	3.5
NM_002398	MEIS1	Meis homeobox 1	-0.284076	0.149845	-0.397581	0.0348541	ASYNC_1042\16\0.266	S_1321\13\0.325	12	22	10	1.76923
NM_016544	DNAJC27	DnaJ (Hsp40) homolog, subfamily C, member 27	-0.173024	0.679503	-0.557423	0.0457106	ASYNC_938\24\0.24	S_1165\19\0.475	1	9	8	5
NM_000754	COMT	catechol-O-methyltransferase isoform MB-COMT	0.196717	0.116214	0.350128	0.00258397	ASYNC_7790\19\0.475	S_9729\13\0.325	9	16	7	1.7
NM_152581	MOSPD2	motile sperm domain containing 2	-0.265427	0.0760837	-0.62371	1.89e-05	ASYNC_7901\19\0.19	S_9898\8\0.2	9	16	7	1.7
NM_001025778,NM_016440	VRK3	vaccinia related kinase 3 isoform 2	0.147859	0.291421	0.303328	0.00972156	ASYNC_7316\18\0.45	S_9104\87\2.175	0	6	6	7
NM_019118	C1orf91	hypothetical protein LOC56063	0.0839821	0.655018	0.337453	0.00498657	ASYNC_192\32\0.266	S_260\15\0.375	1	7	6	4
NM_001080501	TMEM223	transmembrane protein 223	0.0923869	0.623991	0.28294	0.0282613	ASYNC_4547\35\0.875	S_5222\8\0.1;S_5223\9\0.225	8	14	6	1.66667
NM_138350	THAP3	THAP domain containing, apoptosis associated	0.153379	0.308201	0.4428	0.000290662	ASYNC_40\26\0.65	S_50\14\0.35	15	21	6	1.375
NM_013248	NXT1	NTF2-like export factor 1	0.158897	0.187341	0.409185	0.00011938	ASYNC_7498\31\0.775	S_9344\19\0.237	22	28	6	1.26087
NM_015026	MON2	MON2 homolog	-0.225224	0.134885	-0.357404	0.0108657	ASYNC_4986\37\0.616	S_5864\25\0.625	29	35	6	1.2
NM_002074	GNB1	guanine nucleotide-binding protein, beta-1	0.103057	0.45325	0.293103	0.00421757	ASYNC_22\26\0.26	S_27\37\0.925	0	5	5	6
NM_005717	ARPC5	actin related protein 2/3 complex subunit 5	-0.0931925	0.454683	-0.301739	0.00104953	ASYNC_732\16\0.1	S_900\19\0.316	0	5	5	6
NM_015412	C3orf17	hypothetical protein LOC25871 isoform a	-0.298751	0.226589	-0.535838	0.0136058	ASYNC_1519\17\0.283;ASYNC_1520\16\0.266	S_1971\16\0.266;S_1972\13\0.325	0	5	5	6
NM_024038	C19orf43	hypothetical protein MGC2803	0.067873	0.718273	0.270305	0.0212098	ASYNC_6947\35\0.875	S_8553\46\1.15	0	5	5	6
NM_022731	NUCKS1	nuclear casein kinase and cyclin-dependent	-0.166221	0.255646	-0.320139	0.0107874	ASYNC_795\17\0.425;ASYNC_796\32\0.8	S_975\19\0.475;S_976\24\0.6	1	6	5	3.5
NM_015229	KIAA0664	hypothetical protein LOC23277	0.258471	0.0720215	0.33444	0.0190033	ASYNC_6274\42\1.05	S_7584\19\0.475	4	9	5	2
NM_012414	RAB3GAP2	rab3 GTPase-activating protein, non-catalytic	-0.196168	0.234941	-0.375379	0.00872444	ASYNC_827\16\0.4	S_1017\13\0.325;S_1018\8\0.133	0	4	4	5
NM_019030	DHX29	DEAH (Asp-Glu-Ala-His) box polypeptide 29	-0.185047	0.203489	-0.27402	0.0430247	ASYNC_2573\43\1.075	S_2616\44\1.1	0	4	4	5
NM_001126121,NM_001126122,NM_021734	SLC25A19	solute carrier family 25, member 19	0.0185069	0.948739	0.280086	0.0323102	ASYNC_6641\231\5.775	S_8110\181\4.525	3	7	4	2
NM_019852	METTL3	methyltransferase like 3	-0.0573346	0.784436	-0.298497	0.0119448	ASYNC_5297\156\3.9	S_6284\111\2.775	3	7	4	2
NM_032478	MRPL38	mitochondrial ribosomal protein L38	0.192518	0.328528	0.349349	0.0374991	ASYNC_6653\40\1;ASYNC_6654\19\0.475	S_8126\12\0.3;S_8127\10\0.25	3	7	4	2
NM_152925,NM_152926,NM_152927,NM_152928,NM_152929,NM_152930,NM_152931	CPNE1_1	copine I isoform a	0.175404	0.217367	0.333153	0.00731482	ASYNC_7547\28\0.2	S_9410\15\0.375	3	7	4	2
NM_001014445,NM_018096	NLE1	Notchless gene homolog isoform b	-0.154936	0.315446	0.29855	0.0213443	ASYNC_6433\30\0.375	S_7807\37\0.925	7	11	4	1.5
NM_022451	NOC3L	nucleolar complex associated 3 homolog	-0.27189	0.0589949	-0.348317	0.0152997	ASYNC_4266\47\1.175	S_4827\24\0.6	0	3	3	4
NM_014018	MRPS28	mitochondrial ribosomal protein S28	0.137132	0.312902	0.272837	0.0161271	ASYNC_3652\20\0.333;ASYNC_3653\53\1.325	S_4046\45\1.125	1	4	3	2.5
NM_005868	BET1	blocked early in transport 1	-0.248584	0.0946789	-0.40638	0.00387123	ASYNC_3365\163\4.075	S_3650\175\4.375	2	5	3	2
NM_030934	C1orf25	N2,N2-dimethylguanosine tRNA	-0.230196	0.369489	-0.459475	0.029486	ASYNC_737\218\5.45	S_904\99\2.475	3	6	3	1.75
NM_003150,NM_139276	STAT3_1	signal transducer and activator of transcription	-0.13045	0.365347	-0.396549	0.000442327	ASYNC_6488\20\0.5	S_7889\18\0.3	6	9	3	1.42857
NM_018285	IMP3	U3 snoRNP protein 3 homolog	0.213124	0.151724	0.435285	0.00114874	ASYNC_5694\19\0.475	S_6826\10\0.25	6	9	3	1.42857
NM_213662	STAT3	signal transducer and activator of transcription	-0.13045	0.365347	-0.396549	0.000442327	ASYNC_6488\20\0.5	S_7889\18\0.3	6	9	3	1.42857
NM_007080	LSM6	Sm protein F	0.171895	0.259389	0.315745	0.0166831	ASYNC_1863\37\0.925	S_2392\18\0.45	18	21	3	1.15789
NM_001010983,NM_018446	GLT8D1_1	glycosyltransferase 8 domain containing 1	0.157607	0.133922	0.230919	0.0204518	ASYNC_1472\30\0.75	S_1897\20\0.5	0	2	2	3
NM_006644	HSPH1	heat shock 105kD	0.0468129	0.893811	-0.403608	0.0224146	ASYNC_5199\191\4.775	S_6140\27\0.675;S_6141\174\4.35	0	2	2	3
NM_012086	GTF3C3	general transcription factor IIIC, polypeptide	-0.180589	0.118007	-0.313221	0.00350047	ASYNC_1240\76\1.9	S_1578\60\1.5	1	3	2	2
NM_030790	ITFG1	integrin alpha FG-GAP repeat containing 1	-0.136849	0.252138	-0.353478	0.00044317	ASYNC_6047\37\0.231	S_7288\13\0.216	1	3	2	2
NM_015497,NM_001110503	TMEM87A	transmembrane protein 87A isoform 1	-0.229939	0.0760313	-0.405578	0.00103738	ASYNC_5571\18\0.45	S_6658\29\0.725	3	5	2	1.5
NM_017743,NM_130434,NM_197961	DPP8_1	dipeptidyl peptidase 8 isoform 2	-0.134563	0.301299	-0.270049	0.0131859	ASYNC_5644\19\0.086	S_6760\9\0.15	3	5	2	1.5
NM_033661,NM_018669	WDR4	WD repeat domain 4 protein	0.143426	0.41917	0.463527	0.000549292	ASYNC_7761\79\1.975	S_9693\8\0.133;S_9694\72\1.8	3	5	2	1.5
NM_197960	DPP8	dipeptidyl peptidase 8 isoform 3	-0.134563	0.301299	-0.270049	0.0131859	ASYNC_5644\19\0.086;ASYNC_5645\69\1.725	S_6760\9\0.15;S_6761\44\1.1	3	5	2	1.5
NM_005348	HSP90AA1	heat shock protein 90kDa alpha (cytosolic),	-0.0813809	0.666359	-0.322137	0.00737565	ASYNC_5497\17\0.425	S_6571\8\0.133;S_6572\8\0.2;S_6573\10\0.25	4	6	2	1.4
NM_012164	FBXW2	F-box and WD repeat domain containing 2	-0.295227	0.10299	-0.452225	0.0085425	ASYNC_3961\15\0.187;ASYNC_3962\87\2.175	S_4437\15\0.375;S_4438\37\0.925	9	11	2	1.2
NM_002814,NM_170750	PSMD10	proteasome 26S non-ATPase subunit 10 isoform 1	-0.0564247	0.740994	-0.218835	0.0398618	ASYNC_8029\112\0.933	S_10101\77\1.925	0	1	1	2
NM_012260	HACL1	2-hydroxyphytanoyl-CoA lyase	-0.208211	0.0629053	-0.252466	0.0256303	ASYNC_1353\15\0.25	S_1744\9\0.15	0	1	1	2
NM_012458	TIMM13	translocase of inner mitochondrial membrane 13	0.0449401	0.851542	0.330642	0.00703187	ASYNC_6818\213\5.325;ASYNC_6819\19\0.475;ASYNC_6820\36\0.9	S_8377\111\2.775;S_8378\13\0.325	0	1	1	2
NM_017873,NM_177999	ASB6	ankyrin repeat and SOCS box-containing 6 isoform	0.15017	0.381119	0.290522	0.0407767	ASYNC_4051\45\1.125;ASYNC_4052\14\0.35	S_4552\41\1.025	0	1	1	2
NM_080476	PIGU	phosphatidylinositol glycan anchor biosynthesis,	0.192864	0.142084	0.445657	0.000191456	ASYNC_7536\17\0.283;ASYNC_7537\275\6.875	S_9391\121\3.025	1	2	1	1.5
NM_001100880	ST20_1	cervical cancer suppressor-1	0.28023	0.0530475	0.302394	0.0459181	ASYNC_5710\15\0.375;ASYNC_5711\19\0.475	S_6848\9\0.225	2	3	1	1.33333
NM_003930	SKAP2	src kinase associated phosphoprotein 2	-0.133739	0.54301	-0.426048	0.00570712	ASYNC_3234\15\0.25	S_3492\8\0.2	2	3	1	1.33333
NM_030940	ISCA1	HESB like domain containing 2	0.0866848	0.574869	0.285776	0.00705779	ASYNC_3889\77\0.77	S_4327\34\0.85	2	3	1	1.33333
NM_144716	CCDC12	coiled-coil domain containing 12	0.181081	0.283006	0.360073	0.0113761	ASYNC_1405\31\0.258	S_1804\26\0.65;S_1805\13\0.216	2	3	1	1.33333
NM_181708	BCDIN3D	BCDIN3 domain containing	-0.163256	0.229771	-0.276138	0.0223536	ASYNC_4890\26\0.433	S_5713\18\0.3	3	4	1	1.25
NM_001099645	RPL22L1	ribosomal protein L22-like 1	0.0448804	0.771569	0.261444	0.00268419	ASYNC_1666\26\0.162	S_2145\16\0.4;S_2146\15\0.375	4	5	1	1.2
NM_020166	MCCC1	methylcrotonoyl-Coenzyme A carboxylase 1 (alpha)	0.052474	0.823204	-0.274958	0.0340718	ASYNC_1687\14\0.35;ASYNC_1688\14\0.35	S_2159\15\0.375	4	5	1	1.2
NM_152912	MTIF3	mitochondrial translational initiation factor 3	-0.247413	0.087626	-0.340936	0.0303756	ASYNC_5192\14\0.35;ASYNC_5193\14\0.35	S_6132\8\0.2	4	5	1	1.2
NM_030782	CLPTM1L	CLPTM1-like	0.0802539	0.528505	0.214693	0.0207365	ASYNC_1916\250\4.166;ASYNC_1917\14\0.233	S_2443\64\1.6	5	6	1	1.16667
NM_032856	WDR73	WD repeat domain 73	0.203304	0.082424	0.541869	2.88e-06	ASYNC_5721\33\0.825	S_6862\20\0.5	5	6	1	1.16667
NM_015308	FNBP4	formin binding protein 4	-0.229913	0.100136	-0.287559	0.0390649	ASYNC_4491\14\0.233;ASYNC_4492\19\0.475	S_5141\8\0.133;S_5142\12\0.2;S_5143\26\0.65	6	7	1	1.14286
NM_199249	C19orf48_1	multidrug resistance-related protein	0.102232	0.587233	0.349591	0.00622911	ASYNC_7332\22\0.55	S_9116\25\0.625	9	10	1	1.1
NM_199250	C19orf48	multidrug resistance-related protein	0.102232	0.587233	0.349591	0.00622911	ASYNC_7332\22\0.55;ASYNC_7333\26\0.65	S_9116\25\0.625;S_9117\16\0.4	9	10	1	1.1
NM_001184	ATR	ataxia telangiectasia and Rad3 related protein	-0.123209	0.556857	-0.334565	0.026342	ASYNC_1596\38\0.633	S_2095\19\0.475;S_2096\12\0.2	3	3	0	1
NM_004239	TRIP11	thyroid hormone receptor interactor 11	-0.147954	0.510875	-0.521642	0.00110728	ASYNC_5470\64\1.6	S_6533\20\0.5;S_6534\27\0.675	1	1	0	1
NM_004414	RCAN1_2	calcipressin 1 isoform a	-0.162779	0.383131	-0.776645	4.84e-07	ASYNC_7748\17\0.106	S_9671\14\0.35	1	1	0	1
NM_004818	DDX23	DEAD (Asp-Glu-Ala-Asp) box polypeptide 23	0.197686	0.177878	0.333593	0.0121281	ASYNC_4875\396\9.9	S_5697\184\4.6	6	6	0	1
NM_007065	CDC37	cell division cycle 37 protein	0.126846	0.446234	0.354855	0.00449672	ASYNC_6926\16\0.4	S_8516\8\0.2;S_8517\15\0.25;S_8518\9\0.15	8	8	0	1
NM_012479	YWHAG	tyrosine 3-monooxygenase/tryptophan	-0.207233	0.0966585	-0.356752	0.00236668	ASYNC_3342\20\0.5;ASYNC_3343\132\0.942	S_3624\8\0.133;S_3625\106\2.65	3	3	0	1
NM_014462	LSM1	Lsm1 protein	0.178567	0.0806152	0.214991	0.0374495	ASYNC_3597\26\0.65	S_3977\9\0.15	3	3	0	1
NM_014507,NM_173467	MCAT	mitochondrial malonyltransferase isoform b	0.0968997	0.596172	0.445797	0.000254898	ASYNC_7873\64\1.6	S_9858\63\1.575	5	5	0	1
NM_016222	DDX41	DEAD-box protein abstrakt	0.151873	0.325672	0.263948	0.0482878	ASYNC_2795\33\0.15	S_2916\94\2.35	3	3	0	1
NM_018353	C14orf106	chromosome 14 open reading frame 106	-0.0566478	0.880164	-0.407277	0.037769	ASYNC_5351\28\0.7	S_6365\11\0.183;S_6366\36\0.9	3	3	0	1
NM_022341	PDF	peptide deformylase	0.162901	0.269155	0.303044	0.0168466	ASYNC_6138\45\1.125	S_7404\18\0.45	6	6	0	1
NM_030798	WBSCR16	Williams-Beuren syndrome chromosome region 16	0.27232	0.0555097	0.37251	0.00802014	ASYNC_3335\45\0.75	S_3614\30\0.75	0	0	0	1
NM_032382	COG8	component of oligomeric golgi complex 8	0.162901	0.269155	0.303044	0.0168466	ASYNC_6140\64\1.6	S_7405\64\1.066	6	6	0	1
NM_138364	LOC90826	hypothetical protein LOC90826	-0.305239	0.0761923	-0.494222	0.00273556	ASYNC_1864\34\0.85;ASYNC_1865\19\0.475	S_2394\16\0.4	3	3	0	1
NM_203417	RCAN1_1	calcipressin 1 isoform b	-0.162779	0.383131	-0.776645	4.84e-07	ASYNC_7748\17\0.106;ASYNC_7749\109\2.725	S_9671\14\0.35;S_9672\8\0.133;S_9673\89\2.225	1	1	0	1
NM_207356	C1orf174	hypothetical protein LOC339448	0.249888	0.065339	0.328646	0.0144153	ASYNC_32\21\0.21;ASYNC_33\41\0.341;ASYNC_34\89\2.225	S_35\15\0.375;S_36\14\0.35;S_37\32\0.8;S_38\19\0.475;S_39\62\1.55	1	1	0	1
NM_058167,NM_194315,NM_194457,NM_194458	UBE2J2	ubiquitin conjugating enzyme E2, J2 isoform 2	0.191743	0.11086	0.313443	0.00544497	ASYNC_6\78\1.3	S_8\50\1.25	6	5	-1	0.857143
NM_172195	EIF2B4	eukaryotic translation initiation factor 2B,	0.10478	0.501302	0.253458	0.0308588	ASYNC_962\326\8.15	S_1190\225\5.625	6	5	-1	0.857143
NM_001983	ERCC1_1	excision repair cross-complementing 1 isofrom 2	0.0707907	0.727685	0.255519	0.0499438	ASYNC_7209\21\0.525	S_8943\33\0.825	3	2	-1	0.75
NM_005455,NM_203350	ZRANB2	zinc finger protein 265 isoform 2	-0.100621	0.721259	-0.383452	0.0312107	ASYNC_320\28\0.7	S_452\15\0.25;S_453\31\0.775	3	2	-1	0.75
NM_015012	TMEM41B	transmembrane protein 41B	-0.136776	0.413444	-0.31079	0.0180324	ASYNC_4402\17\0.425	S_5034\19\0.475	3	2	-1	0.75
NM_018163	DNAJC17	DnaJ (Hsp40) homolog, subfamily C, member 17	0.139062	0.395602	0.336803	0.00851919	ASYNC_5560\22\0.55;ASYNC_5562\257\6.425	S_6638\12\0.2;S_6640\112\2.8	3	2	-1	0.75
NM_018451	CENPJ	centromere protein J	-0.0644943	0.82418	-0.343432	0.0314137	ASYNC_5186\143\3.575	S_6125\81\2.025	3	2	-1	0.75
NM_178832	MORN4	MORN repeat containing 4	-0.0765273	0.811428	-0.436555	0.012545	ASYNC_4279\69\0.862	S_4842\45\1.125	3	2	-1	0.75
NM_194460	RNF126	ring finger protein 126	0.248328	0.130957	0.435457	0.00405362	ASYNC_6785\53\1.325	S_8333\21\0.35	3	2	-1	0.75
NM_015703	RRP7A	ribosomal RNA processing 7 homolog A	0.00819504	0.977974	0.355778	0.00813804	ASYNC_7868\30\0.75	S_9851\21\0.525	2	1	-1	0.666667
NM_015590,NM_182679	GPATCH4	G patch domain containing 4 isoform 1	0.0905956	0.791161	0.408686	0.0416897	ASYNC_609\68\1.7;ASYNC_610\15\0.375	S_762\81\2.025	13	11	-2	0.857143
NM_001013663	C2orf79	hypothetical protein LOC391356	0.217216	0.0812151	0.314062	0.00923235	ASYNC_937\83\2.075	S_1164\70\1.75	7	5	-2	0.75
NM_001007527	LMBRD2	LMBR1 domain containing 2	-0.0428401	0.939674	-0.548194	0.0383056	ASYNC_2393\318\7.95	S_2547\198\4.95	6	4	-2	0.714286
NM_006965	ZNF24	zinc finger protein 24	0.249182	0.264495	-0.293005	0.0282613	ASYNC_6745\68\1.7	S_8270\54\1.35	5	3	-2	0.666667
NM_015496,NM_183009	KIAA1429	hypothetical protein LOC25962 isoform 1	-0.161428	0.18091	-0.275144	0.0115734	ASYNC_3664\34\0.85;ASYNC_3665\35\0.35	S_4060\23\0.575;S_4061\15\0.375;S_4062\40\1	5	3	-2	0.666667
NM_031954	KCTD10	potassium channel tetramerisation domain	0.0662827	0.678574	0.222144	0.0348165	ASYNC_5077\61\1.525	S_5970\20\0.5	5	3	-2	0.666667
NM_032846	RAB2B	RAB2B protein	-0.14136	0.504675	-0.327453	0.0432087	ASYNC_5296\44\1.1	S_6282\19\0.475	5	3	-2	0.666667
NM_016059	PPIL1	peptidylprolyl isomerase-like 1	0.308022	0.0759527	0.383327	0.0275456	ASYNC_2960\41\1.025	S_3155\52\1.3	4	2	-2	0.6
NM_202001	ERCC1	excision repair cross-complementing 1 isoform 1	0.0707907	0.727685	0.255519	0.0499438	ASYNC_7209\21\0.525	S_8943\33\0.825	4	2	-2	0.6
NM_001048265,NM_144654	C9orf116	hypothetical protein LOC138162 isoform 1	0.252688	0.0940636	0.581595	4.94e-05	ASYNC_4098\63\1.575	S_4604\33\0.33	3	1	-2	0.5
NM_002109	HARS	histidyl-tRNA synthetase	0.0566365	0.754095	0.223721	0.0446164	ASYNC_2722\41\0.292	S_2825\46\0.766	3	1	-2	0.5
NM_017848	FAM120C	hypothetical protein LOC54954	-2.8e-05	0.99994	0.302564	0.0340972	ASYNC_7990\36\0.3	S_10038\30\0.75	3	1	-2	0.5
NM_023012,NM_198261	RSRC2	arginine/serine-rich coiled-coil 2 isoform a	-0.0598988	0.800145	-0.277084	0.0433234	ASYNC_5140\22\0.55	S_6063\20\0.5	3	1	-2	0.5
NM_198262	RSRC2_1	arginine/serine-rich coiled-coil 2 isoform c	-0.0598988	0.800145	-0.277084	0.0433234	ASYNC_5140\22\0.55	S_6063\20\0.5	3	1	-2	0.5
NM_020317	C1orf63	hypothetical protein LOC57035	0.128539	0.583611	-0.336051	0.0477643	ASYNC_137\15\0.375	S_180\12\0.3	2	0	-2	0.333333
NM_014949	KIAA0907	hypothetical protein LOC22889	0.157554	0.227456	-0.321145	0.0043378	ASYNC_591\77\1.925;ASYNC_592\30\0.75	S_733\15\0.375;S_734\59\1.475;S_735\24\0.6	12	9	-3	0.769231
NM_018198	DNAJC11	DnaJ (Hsp40) homolog, subfamily C, member 11	0.229035	0.0632209	0.331967	0.00582524	ASYNC_41\139\3.475	S_51\85\2.125	9	6	-3	0.7
NM_030809	CSRNP2	TGF-beta induced apoptosis protein 12	-0.19217	0.365251	-0.577578	0.00050455	ASYNC_4907\192\4.8	S_5732\77\0.77	9	6	-3	0.7
NM_032881	LSM10	LSM10, U7 small nuclear RNA associated	0.0790449	0.676333	0.301912	0.0123744	ASYNC_215\119\2.975	S_293\13\0.325;S_294\84\2.1	7	4	-3	0.625
NM_003941	WASL	Wiskott-Aldrich syndrome gene-like protein	-0.236884	0.150043	-0.320938	0.0434857	ASYNC_3453\20\0.333	S_3766\18\0.3	6	3	-3	0.571429
NM_005858	AKAP8	A-kinase anchor protein 8	0.122795	0.421394	0.267834	0.0269546	ASYNC_6988\16\0.266;ASYNC_6989\126\3.15;ASYNC_6990\23\0.191	S_8617\14\0.35;S_8618\106\2.65;S_8619\12\0.2	6	3	-3	0.571429
NM_017566	KLHDC4	kelch domain containing 4	0.0944527	0.620432	0.433981	0.000488497	ASYNC_6231\78\1.95	S_7521\40\1	6	3	-3	0.571429
NM_145691	ATPAF2	ATP synthase mitochondrial F1 complex assembly	-0.0348528	0.901535	0.286678	0.0473794	ASYNC_6376\154\3.85	S_7728\61\1.525	6	3	-3	0.571429
NM_173475	DCUN1D3	DCN1, defective in cullin neddylation 1, domain	0.271895	0.0660187	0.376678	0.00947948	ASYNC_5921\42\1.05	S_7117\37\0.925	5	2	-3	0.5
NM_001040610,NM_024580	EFTUD1	elongation factor Tu GTP binding domain	-0.159024	0.194455	-0.356864	0.000843469	ASYNC_5714\35\0.875	S_6851\14\0.14	4	1	-3	0.4
NM_006753	SURF6	surfeit 6	-0.0808019	0.651312	0.284453	0.0150093	ASYNC_4084\117\2.925	S_4590\38\0.95	4	1	-3	0.4
NM_016050,NM_170738,NM_170739	MRPL11	mitochondrial ribosomal protein L11 isoform a	0.159952	0.15312	0.326549	0.00119105	ASYNC_4622\53\1.325;ASYNC_4623\166\4.15	S_5345\61\1.525;S_5346\153\3.825	3	0	-3	0.25
NM_004630,NM_201995,NM_201998,NM_201997	SF1	splicing factor 1 isoform 1	-0.24845	0.0674852	-0.28032	0.0457171	ASYNC_4576\14\0.35;ASYNC_4577\14\0.233	S_5280\13\0.216;S_5281\17\0.425;S_5282\8\0.2	9	5	-4	0.6
NM_012394	PFDN2	prefoldin subunit 2	0.0843699	0.538512	0.236098	0.0165687	ASYNC_637\31\0.775	S_795\15\0.375	9	5	-4	0.6
NM_014042	C11orf51	hypothetical protein LOC25906	0.182762	0.235079	0.280747	0.0460783	ASYNC_4672\33\0.126	S_5409\22\0.366;S_5410\47\1.175;S_5411\8\0.133	9	5	-4	0.6
NM_004330	BNIP2	BCL2/adenovirus E1B 19kD interacting protein 2	-0.224005	0.238469	-0.499716	0.00200171	ASYNC_5626\25\0.416	S_6725\17\0.425	7	3	-4	0.5
NM_005793	NME6	nucleoside diphosphate kinase type 6	0.122316	0.517252	0.327533	0.0177196	ASYNC_1416\40\0.285	S_1823\48\1.2;S_1824\8\0.133	6	2	-4	0.428571
NM_018266	TMEM39A	transmembrane protein 39A	-0.161148	0.324804	-0.28056	0.0474435	ASYNC_1526\51\1.275	S_1986\29\0.725	6	2	-4	0.428571
NM_000368,NM_001162426,NM_001162427	TSC1	tuberous sclerosis 1 protein isoform 1	-0.0363616	0.879891	-0.310889	0.00972156	ASYNC_4081\45\1.125;ASYNC_4082\17\0.425	S_4586\16\0.4;S_4587\11\0.275	4	0	-4	0.2
NM_031287	SF3B5	SF3b10	0.174084	0.155613	0.26851	0.0185908	ASYNC_3116\49\0.816;ASYNC_3117\62\1.033	S_3349\37\0.925;S_3350\66\1.65	9	4	-5	0.5
NM_001033025,NM_001439	EXTL2	multiple exostoses-like 2	0.0998078	0.487666	-0.23874	0.028862	ASYNC_363\22\0.183	S_494\11\0.275	6	1	-5	0.285714
NM_001040181,NM_001040182,NM_001040183,NM_001040199,NM_001040200,NM_019895	CLDND1	claudin domain containing 1 protein isoform a	-0.121431	0.578404	-0.394791	0.0085425	ASYNC_1498\94\2.35	S_1937\20\0.5;S_1938\62\1.55	6	1	-5	0.285714
NM_001040424,NM_022115	PRDM15	PR domain containing 15 isoform 2	0.13182	0.37139	0.330503	0.0044332	ASYNC_7758\82\2.05	S_9687\75\1.875	6	1	-5	0.285714
NM_005642	TAF7	TATA box-binding protein-associated factor 2F	-0.19992	0.116924	-0.344284	0.00370043	ASYNC_2727\19\0.475	S_2830\8\0.2	6	1	-5	0.285714
NM_152417	TMEM68	transmembrane protein 68	0.22043	0.0832258	0.63025	8.02e-07	ASYNC_3619\48\1.2	S_4008\18\0.45	6	1	-5	0.285714
NM_178454	TMEM77	transmembrane protein 77	0.0565761	0.869783	-0.368825	0.0441127	ASYNC_399\48\0.8	S_532\48\1.2	13	7	-6	0.571429
NM_025090	USP36	ubiquitin specific protease 36	0.102898	0.653816	0.318224	0.0404296	ASYNC_6673\38\0.633;ASYNC_6674\20\0.5	S_8158\43\1.075;S_8159\14\0.35	9	3	-6	0.4
NM_016536	ZNF571	zinc finger protein 571	-0.335648	0.136393	-0.576777	0.00542312	ASYNC_7121\98\2.45	S_8795\77\1.925	6	0	-6	0.142857
NM_032479	MRPL36	mitochondrial ribosomal protein L36	0.212184	0.110143	0.331896	0.00808578	ASYNC_1923\86\0.537	S_2445\47\1.175;S_2446\20\0.5	12	5	-7	0.461538
NM_001002913	PTRH1	peptidyl-tRNA hydrolase 1 homolog	0.254126	0.10125	0.389894	0.00813804	ASYNC_4003\109\2.725	S_4482\40\1	9	2	-7	0.3
NM_005399	PRKAB2	AMP-activated protein kinase beta 2	-0.18472	0.332765	-0.476521	0.0146781	ASYNC_496\37\0.231	S_594\17\0.425	9	1	-8	0.2
NM_017907	C11orf59	hypothetical protein LOC55004	0.195066	0.0548102	0.290497	0.00345827	ASYNC_4671\32\0.145	S_5406\8\0.2;S_5407\19\0.316;S_5408\22\0.366	12	3	-9	0.307692
NM_001014283	DCUN1D2	DCN1, defective in cullin neddylation 1, domain	0.220831	0.0803056	0.344649	0.00441811	ASYNC_5278\83\2.075	S_6253\53\1.325	11	1	-10	0.166667
NM_001009877	BRD9	bromodomain containing 9 isoform 2	0.20904	0.132949	0.333088	0.0102003	ASYNC_1907\78\0.325	S_2437\10\0.25	22	11	-11	0.521739
NM_023924	BRD9_1	bromodomain containing 9 isoform 1	0.20904	0.132949	0.333088	0.0102003	ASYNC_1907\78\0.325	S_2437\10\0.25	22	11	-11	0.521739
