# Supplementary figures and images for: HCFC1 is a common component of active human CpG-island promoters and coincides with ZNF143, THAP11, YY1, and GABP transcription factor occupancy
Source: HighWire-hosted journal article supplement (doi:10.1101/gr.150078.112), 2013-03-28

A

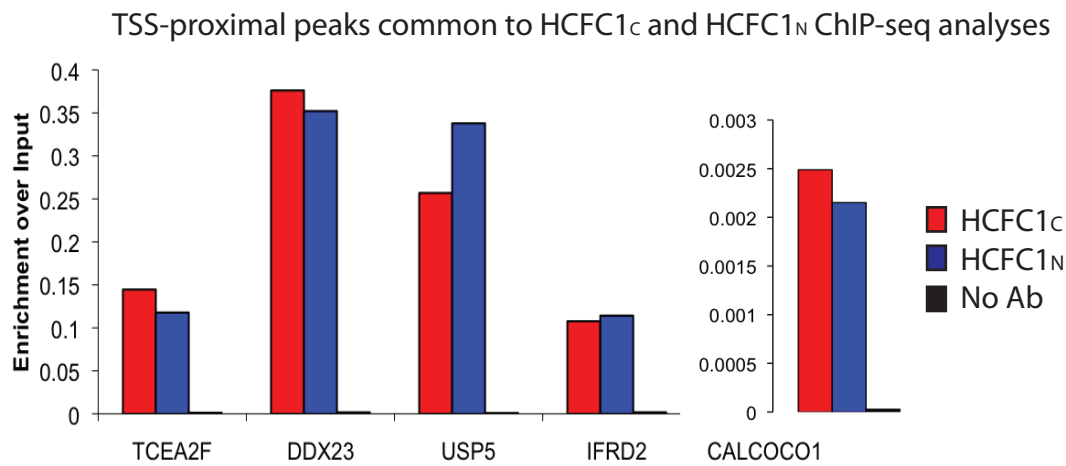

B

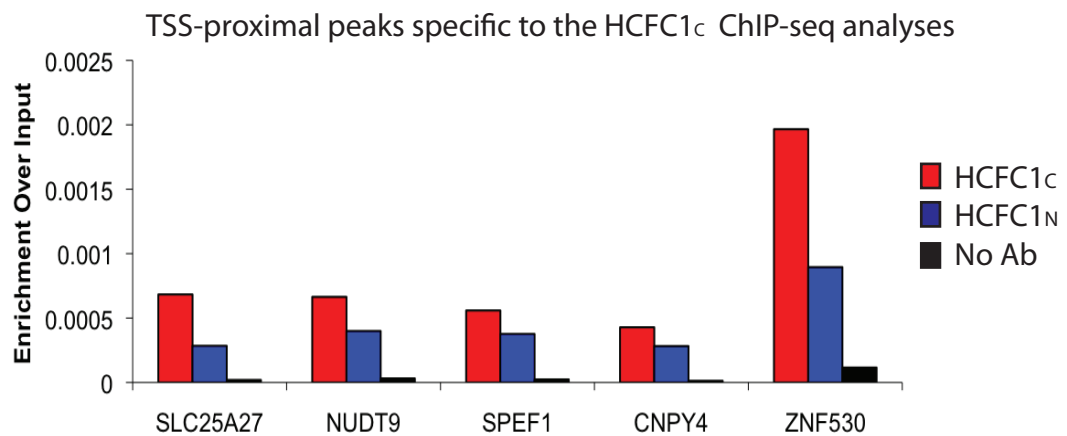

C

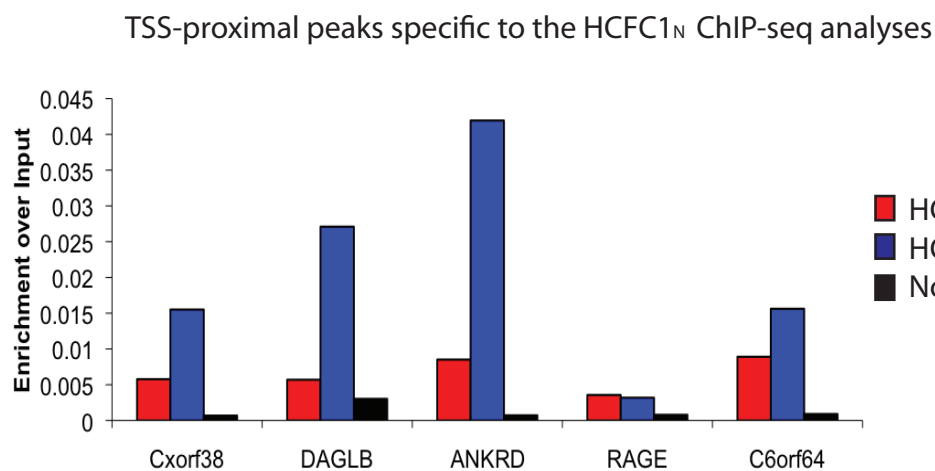

D

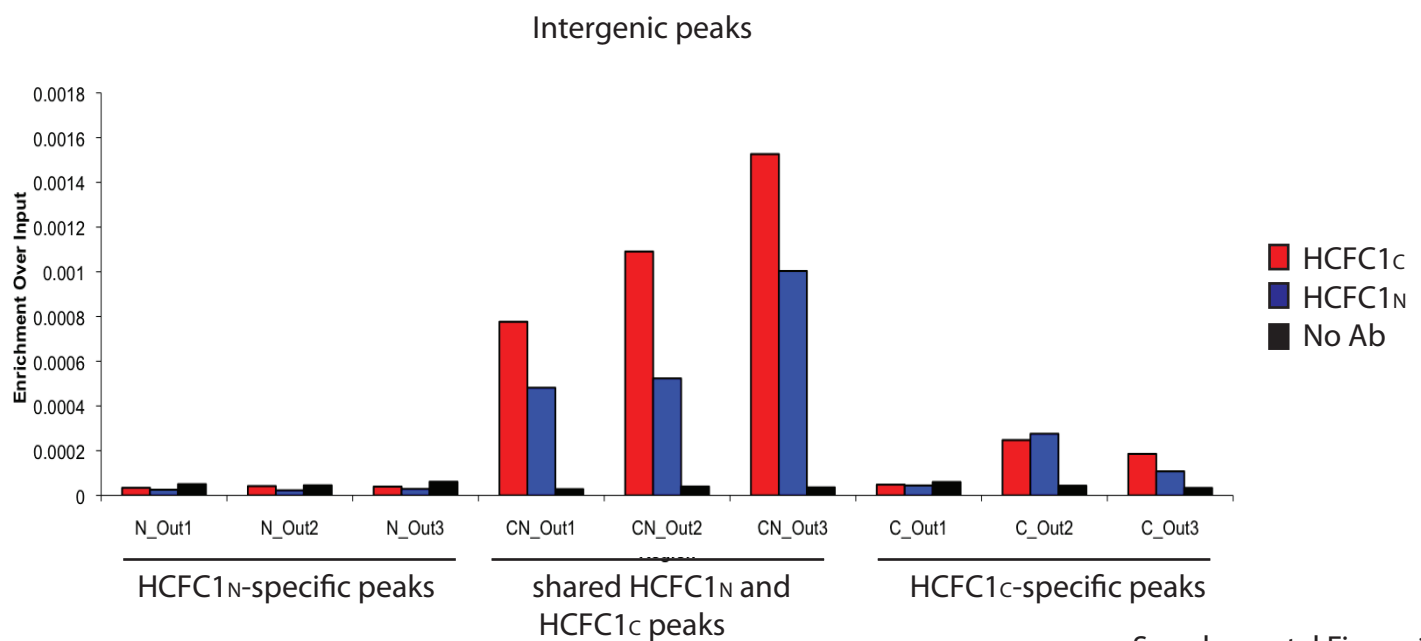

Supplement: Supplemental_DataFigure2.pdf [file Supplemental_DataFigure2.pdf]
